# Supplementary material for: No Alteration Between Intrinsic Connectivity Networks by a Pilot Study on Localized Exposure to the Fourth-Generation Wireless Communication Signals
Source: Front Public Health. 2022 Jan 13;9:734370. doi: 10.3389/fpubh.2021.734370 (PMC8793026; doi:10.3389/fpubh.2021.734370)
Supplement: Supplementary file 1 [file Table_1.XLSX]

## Sheet: State 3
neam of ICN	name of IC	Correlations
ASN	' 68'	0	0.154207	0.0355361	0.00450783	0.303657	-0.0765055	-0.0157191	0.0156445	-0.152998	0.111274	0.226385	-0.194128	0.050561	0.410685	0.204773	0.21153	-0.135039	-0.0616474	0.265261	0.162244	0.0763663	0.221354	-0.0799963	-0.199058	0.0224602	-0.0788876	-0.102905	-0.177743	0.0673604	0.0849959	0.0561758	0.00464374	0.037524	0.164975	0.332779	0.215912	0.432698	0.125951	-0.148108	0.231343	-0.281945	-0.0367512	-0.19674	0.173304	-0.280954	-0.201463	0.111314	-0.215499
	' 26'	0.154207	0	0.709448	0.251376	0.66284	0.346616	-0.0587881	-0.174716	0.243132	0.706772	0.450226	0.371982	0.699786	0.363048	-0.00774343	0.215475	0.180676	0.13556	0.40774	-0.127166	-0.339682	-0.105923	-0.100211	0.525647	-0.177152	0.638862	0.17176	-0.0196899	0.186328	-0.0565677	-0.00140117	-0.490899	-0.176555	0.14735	0.393895	-0.227219	0.534853	-0.109573	0.330057	-0.0589137	0.0312405	-0.189931	0.0491225	0.173785	0.259444	-0.0150521	-0.732766	-0.264362
	' 64'	0.0355361	0.709448	0	0.409311	0.786359	0.699943	0.705315	-0.161132	0.216925	0.38383	0.592668	0.316738	0.66309	0.680236	-0.273543	0.519566	0.115546	0.266987	0.377772	-0.6713	-0.393818	-0.536483	-0.409254	0.366048	-0.394355	0.319171	0.237458	-0.479739	-0.275603	-0.170052	-0.501519	-0.574036	-0.824872	0.417592	0.678724	-0.225886	0.469101	-0.174704	0.172051	-0.44136	-0.230658	-0.6012	-0.404043	0.611013	0.607603	0.0712066	-0.689311	0.0257444
	' 66'	0.00450783	0.251376	0.409311	0	0.280735	0.157369	0.583926	-0.0600471	0.0182658	-0.101414	0.354748	0.0170871	0.340033	0.525075	-0.218152	0.310531	0.111282	0.187623	0.177844	-0.553913	-0.295469	-0.521293	-0.381269	-0.0676706	-0.34988	0.0797097	0.157704	-0.518838	-0.484046	-0.131081	-0.271792	-0.284958	-0.483825	0.42653	0.443567	-0.100888	0.277182	-0.133835	-0.26344	-0.496459	-0.446768	-0.67002	-0.361748	0.0683706	0.00926754	-0.218152	-0.407732	-0.186743
BGN	' 91'	0.303657	0.66284	0.786359	0.280735	0	0.615477	0.365244	-0.134973	-0.00918508	0.29001	0.486832	0.0272864	0.753431	0.675895	-0.238986	0.556187	0.0446582	0.123485	0.670806	-0.231198	-0.209202	-0.347942	-0.2455	0.433247	-0.27417	0.326673	0.130266	-0.51398	-0.138305	-0.112824	-0.298216	-0.449911	-0.505199	0.430115	0.843002	0.186465	0.828402	0.0508477	0.0875084	-0.180147	-0.354169	-0.396801	-0.295044	0.592789	0.355159	-0.0410126	-0.634277	0.0147525
	' 7'	-0.0765055	0.346616	0.699943	0.157369	0.615477	0	0.423358	0.0269627	0.0985034	0.171607	0.228343	0.122144	0.35273	0.403834	-0.233202	0.340535	0.0384982	0.275549	0.400755	-0.386135	-0.190057	-0.460799	-0.297342	0.145033	-0.241335	0.0642726	0.208547	-0.292588	-0.310141	-0.145436	-0.437334	-0.264541	-0.425792	0.335155	0.585155	-0.0500338	0.332731	-0.178203	0.152779	-0.226667	-0.231471	-0.50679	-0.301991	0.631502	0.2437	0.162778	-0.432823	-0.0103458
	' 23'	-0.0157191	-0.0587881	0.705315	0.583926	0.365244	0.423358	0	-0.0675457	0.16707	-0.247877	0.743211	0.29212	0.616798	0.724773	-0.414634	0.578275	0.0760852	0.226394	0.298358	-1.13611	-0.379681	-0.687662	-0.564127	-0.0972801	-0.548238	0.00918605	0.0546436	-0.844915	-0.802331	-0.350904	-0.635695	-0.376672	-1.09479	0.629113	0.818382	0.00733809	0.219564	0.0520901	-0.315789	-0.771989	-0.56246	-1.07139	-0.795535	0.71614	0.438223	0.0375857	-0.701244	0.0407845
AUN	' 29'	0.0156445	-0.174716	-0.161132	-0.0600471	-0.134973	0.0269627	-0.0675457	0	-0.25678	-0.214979	-0.137111	-0.458698	-0.376162	-0.00600656	-0.187611	0.0809842	-0.695268	-0.373057	-0.332234	0.0236305	0.149807	0.0510527	-0.0051223	-0.283103	0.308488	-0.535583	-0.426309	-0.0165603	-0.184445	-0.0790823	-0.104922	0.10816	0.0305687	0.0648065	-0.167518	0.244639	-0.00430946	0.100144	-0.00568646	0.144427	-0.143351	0.176505	-0.0711764	0.157419	-0.328565	0.0579736	0.491185	0.228288
	' 25'	-0.152998	0.243132	0.216925	0.0182658	-0.00918508	0.0985034	0.16707	-0.25678	0	0.673268	0.463552	0.367081	0.225915	0.184372	-0.166054	0.130527	0.614338	0.12513	0.0687764	-0.343567	-0.021491	-0.0458634	-0.0954759	0.141384	0.0483064	0.327904	0.503082	0.238133	0.039275	-0.132453	-0.265561	-0.43025	-0.079404	0.0524467	0.0376207	-0.31488	-0.0261995	-0.163547	0.00880785	-0.0327306	0.402202	-0.129262	-0.144451	0.232567	0.276849	0.292164	-0.274878	-0.0389941
	' 44'	0.111274	0.706772	0.38383	-0.101414	0.29001	0.171607	-0.247877	-0.214979	0.673268	0	0.442611	0.384579	0.373466	0.241017	0.0270861	0.145666	0.551712	0.143199	0.196619	0.0868919	-0.201211	0.13219	-0.041213	0.256822	0.300864	0.516216	0.21975	0.190041	0.268054	-0.00264929	-0.195599	-0.323592	0.101148	-0.194999	0.105875	-0.294539	0.292482	-0.275845	0.316853	0.248513	0.359256	0.138135	0.178372	0.118846	0.168221	0.188998	-0.33662	-0.0178024
LGN	' 86'	0.226385	0.450226	0.592668	0.354748	0.486832	0.228343	0.743211	-0.137111	0.463552	0.442611	0	0.266715	0.698651	0.791811	-0.217341	0.725215	0.460336	0.0080715	0.375413	-0.638884	-0.300669	-0.394039	-0.25106	0.376081	-0.508902	0.479395	0.344184	-0.44435	-0.068339	-0.41676	-0.513608	-0.757891	-0.646254	0.50517	0.66486	-0.145918	0.547301	-0.0540766	-0.345547	-0.466407	-0.345849	-0.52456	-0.611268	0.502508	0.279467	-0.173281	-0.662077	-0.211631
	' 21'	-0.194128	0.371982	0.316738	0.0170871	0.0272864	0.122144	0.29212	-0.458698	0.367081	0.384579	0.266715	0	0.581767	0.179278	0.228375	0.254696	0.510299	0.73139	0.242261	-0.475206	-0.342701	-0.100711	-0.0327516	0.538332	-0.126114	0.512425	0.328911	-0.0280062	0.0771852	0.0552873	0.0527779	-0.0903266	-0.189831	0.158376	0.27445	-0.208664	0.102641	-0.0812645	0.223875	-0.106671	0.195295	-0.308894	0.106685	-0.0189025	0.701399	0.228517	-0.594529	0.032803
	' 34'	0.050561	0.699786	0.66309	0.340033	0.753431	0.35273	0.616798	-0.376162	0.225915	0.373466	0.698651	0.581767	0	0.626164	-0.0508337	0.561015	0.236677	0.433468	0.810823	-0.496241	-0.393297	-0.412383	-0.233969	0.546371	-0.393259	0.480156	0.30758	-0.266625	-0.0822557	-0.0307996	-0.304848	-0.610602	-0.482706	0.55557	0.76254	0.131237	0.525875	0.00998092	-0.0438608	-0.382684	-0.334468	-0.594758	-0.44861	0.313084	0.739521	0.0217834	-1.05151	-0.0754575
	' 35'	0.410685	0.363048	0.680236	0.525075	0.675895	0.403834	0.724773	-0.00600656	0.184372	0.241017	0.791811	0.179278	0.626164	0	-0.319994	0.641925	0.16624	0.141892	0.329602	-0.81783	-0.37799	-0.613382	-0.424572	0.0529779	-0.483891	0.0356572	0.217829	-0.634611	-0.375488	-0.344762	-0.539358	-0.927824	-0.978879	0.749374	0.983078	0.0606706	0.471326	0.0916321	-0.25672	-0.726478	-0.609941	-0.911499	-0.677331	0.721914	0.0994466	-0.225508	-0.67666	-0.27586
	' 46'	0.204773	-0.00774343	-0.273543	-0.218152	-0.238986	-0.233202	-0.414634	-0.187611	-0.166054	0.0270861	-0.217341	0.228375	-0.0508337	-0.319994	0	-0.020293	0.0126251	-0.0471926	-0.261763	0.260459	0.192792	0.326127	0.458651	-0.122652	0.12485	-0.100874	0.0104188	0.149083	0.323254	0.173663	0.211393	0.537615	0.429523	0.0167627	-0.312225	0.213084	-0.200516	0.0226541	-0.0857179	0.312643	0.172321	0.396208	0.32351	-0.22764	0.0620961	-0.109669	0.356163	0.0236599
VSN	' 57'	0.21153	0.215475	0.519566	0.310531	0.556187	0.340535	0.578275	0.0809842	0.130527	0.145666	0.725215	0.254696	0.561015	0.641925	-0.020293	0	-0.132506	0.0970275	0.213249	-0.783465	-0.167492	-0.451956	-0.279149	0.0203376	-0.450705	0.231584	0.145817	-0.53779	-0.2943	-0.449274	-0.777124	-0.485571	-0.641024	0.56333	0.607139	0.14115	0.363586	0.0706103	-0.276394	-0.256465	-0.287445	-0.561626	-0.591619	0.580948	0.510253	-0.287878	-0.381418	0.133143
	' 5'	-0.135039	0.180676	0.115546	0.111282	0.0446582	0.0384982	0.0760852	-0.695268	0.614338	0.551712	0.460336	0.510299	0.236677	0.16624	0.0126251	-0.132506	0	0.304855	0.285318	-0.201746	-0.161189	-0.0976013	0.144657	0.390688	-0.15943	0.530685	0.638723	0.0863801	0.321246	0.0318065	0.0227211	-0.279546	-0.204559	-0.0659198	0.169865	-0.211771	-0.00574936	-0.0177915	-0.144281	-0.175918	0.303399	-0.0987659	-0.0395768	0.0437058	0.23835	0.08875	-0.353598	-0.0421706
	' 33'	-0.0616474	0.13556	0.266987	0.187623	0.123485	0.275549	0.226394	-0.373057	0.12513	0.143199	0.0080715	0.73139	0.433468	0.141892	-0.0471926	0.0970275	0.304855	0	0.556922	-0.12728	-0.23513	-0.295011	-0.057765	0.368555	-0.302031	0.315661	0.344349	0.0184835	-0.123275	0.433161	0.0628591	0.0492235	-0.113261	0.400921	0.515621	-0.235866	0.0493526	0.0353974	0.178209	-0.262178	0.127552	-0.197691	0.206765	-0.197245	0.317204	0.0436926	-0.354291	0.0202215
	' 49'	0.265261	0.40774	0.377772	0.177844	0.670806	0.400755	0.298358	-0.332234	0.0687764	0.196619	0.375413	0.242261	0.810823	0.329602	-0.261763	0.213249	0.285318	0.556922	0	-0.0479957	-0.0861809	-0.369192	-0.187517	0.373505	-0.205033	0.488866	0.266738	-0.0793288	-0.0497906	0.450302	-0.123756	-0.372318	-0.244228	0.205672	0.705828	-0.0124411	0.246664	0.129632	0.0885136	-0.17488	-0.0756197	-0.37164	-0.141359	0.0845581	0.25156	0.0421911	-0.664083	0.0566893
PCN	' 70'	0.162244	-0.127166	-0.6713	-0.553913	-0.231198	-0.386135	-1.13611	0.0236305	-0.343567	0.0868919	-0.638884	-0.475206	-0.496241	-0.81783	0.260459	-0.783465	-0.201746	-0.12728	-0.0479957	0	0.469376	0.772177	0.56811	0.0894772	0.48832	0.0897558	-0.140724	0.642011	0.626076	0.619507	0.786412	0.719156	1.10341	-0.45206	-0.530147	0.0304259	-0.218103	0.0230796	0.334652	0.811079	0.329543	1.18831	0.811272	-0.650579	-0.467129	-0.0301377	0.751884	0.188532
	' 43'	0.0763663	-0.339682	-0.393818	-0.295469	-0.209202	-0.190057	-0.379681	0.149807	-0.021491	-0.201211	-0.300669	-0.342701	-0.393297	-0.37799	0.192792	-0.167492	-0.161189	-0.23513	-0.0861809	0.469376	0	0.0958794	0.330078	-0.173699	-0.0422443	-0.149127	-0.139814	0.161443	0.094016	0.332865	0.164894	0.55021	0.184078	-0.241435	-0.275574	0.381397	-0.163366	0.257678	-0.0745802	0.57982	0.271286	0.432945	0.17898	-0.0132868	-0.02312	-0.126594	0.596214	0.340767
HVN	' 82'	0.221354	-0.105923	-0.536483	-0.521293	-0.347942	-0.460799	-0.687662	0.0510527	-0.0458634	0.13219	-0.394039	-0.100711	-0.412383	-0.613382	0.326127	-0.451956	-0.0976013	-0.295011	-0.369192	0.772177	0.0958794	0	0.317935	-0.0755595	0.561761	-0.00448225	-0.489589	0.39457	0.675748	0.219844	0.502577	0.500008	0.676461	-0.409874	-0.623482	0.0954286	-0.0719282	-0.0582041	0.365985	0.71654	0.492058	1.06173	0.790809	-0.391347	-0.170288	0.100308	0.611959	0.116752
	' 40'	-0.0799963	-0.100211	-0.409254	-0.381269	-0.2455	-0.297342	-0.564127	-0.0051223	-0.0954759	-0.041213	-0.25106	-0.0327516	-0.233969	-0.424572	0.458651	-0.279149	0.144657	-0.057765	-0.187517	0.56811	0.330078	0.317935	0	0.532329	0.0667069	0.0670301	-0.0207104	0.285269	0.558549	0.175499	0.417244	0.290783	0.541646	-0.437323	-0.581696	0.0824894	-0.187951	0.355602	-0.0502298	0.426445	0.376237	0.582395	0.448604	-0.34409	-0.0368726	-0.156767	0.330495	0.0570952
SMN	' 60'	-0.199058	0.525647	0.366048	-0.0676706	0.433247	0.145033	-0.0972801	-0.283103	0.141384	0.256822	0.376081	0.538332	0.546371	0.0529779	-0.122652	0.0203376	0.390688	0.368555	0.373505	0.0894772	-0.173699	-0.0755595	0.532329	0	-0.29756	0.675107	0.246502	0.144854	0.519282	0.104074	0.148865	-0.273438	0.0250228	-0.245835	-0.0233752	-0.0752449	0.437333	0.317365	0.127742	-0.153316	0.223519	-0.121572	0.126389	-0.0673043	0.386611	-0.173512	-0.467336	0.00645746
	' 12'	0.0224602	-0.177152	-0.394355	-0.34988	-0.27417	-0.241335	-0.548238	0.308488	0.0483064	0.300864	-0.508902	-0.126114	-0.393259	-0.483891	0.12485	-0.450705	-0.15943	-0.302031	-0.205033	0.48832	-0.0422443	0.561761	0.0667069	-0.29756	0	-0.0973569	-0.377657	0.61288	0.289716	0.137654	0.290064	0.358922	0.733191	-0.450602	-0.590207	-0.0832018	-0.336779	-0.365331	0.565157	0.690913	0.501537	0.45171	0.464556	-0.266807	-0.25421	0.705756	0.355548	0.0139758
	' 14'	-0.0788876	0.638862	0.319171	0.0797097	0.326673	0.0642726	0.00918605	-0.535583	0.327904	0.516216	0.479395	0.512425	0.480156	0.0356572	-0.100874	0.231584	0.530685	0.315661	0.488866	0.0897558	-0.149127	-0.00448225	0.0670301	0.675107	-0.0973569	0	0.625517	0.153665	0.399351	0.110487	-0.101169	-0.370586	-0.11031	-0.0615712	0.327776	-0.292279	0.19915	0.0622446	0.0975358	-0.0742186	0.319454	0.065628	0.178348	-0.0295668	0.366124	0.0451793	-0.546281	-0.134531
	' 50'	-0.102905	0.17176	0.237458	0.157704	0.130266	0.208547	0.0546436	-0.426309	0.503082	0.21975	0.344184	0.328911	0.30758	0.217829	0.0104188	0.145817	0.638723	0.344349	0.266738	-0.140724	-0.139814	-0.489589	-0.0207104	0.246502	-0.377657	0.625517	0	-0.0281962	-0.0774667	-0.168863	-0.339569	-0.317935	-0.239177	-0.0610513	0.315139	-0.496331	0.101446	-0.0378873	-0.0626962	-0.422058	-0.0265747	-0.191159	-0.136612	0.0954505	0.295685	0.145443	-0.430108	-0.200266
PVN	' 51'	-0.177743	-0.0196899	-0.479739	-0.518838	-0.51398	-0.292588	-0.844915	-0.0165603	0.238133	0.190041	-0.44435	-0.0280062	-0.266625	-0.634611	0.149083	-0.53779	0.0863801	0.0184835	-0.0793288	0.642011	0.161443	0.39457	0.285269	0.144854	0.61288	0.153665	-0.0281962	0	0.704619	0.381536	0.432362	0.295246	0.930007	-0.530151	-0.580126	-0.0478883	-0.415268	-0.028301	0.28467	0.412224	0.808543	0.580981	0.572346	-0.443633	-0.172182	0.516553	0.31969	-0.00574805
LECN	' 78'	0.0673604	0.186328	-0.275603	-0.484046	-0.138305	-0.310141	-0.802331	-0.184445	0.039275	0.268054	-0.068339	0.0771852	-0.0822557	-0.375488	0.323254	-0.2943	0.321246	-0.123275	-0.0497906	0.626076	0.094016	0.675748	0.558549	0.519282	0.289716	0.399351	-0.0774667	0.704619	0	0.226603	0.464973	0.039142	0.843309	-0.41694	-0.418702	0.0587543	0.115768	0.139094	0.150856	0.345388	0.755396	0.657959	0.558572	-0.391779	-0.0174719	-0.13218	0.228573	-0.124769
	' 59'	0.0849959	-0.0565677	-0.170052	-0.131081	-0.112824	-0.145436	-0.350904	-0.0790823	-0.132453	-0.00264929	-0.41676	0.0552873	-0.0307996	-0.344762	0.173663	-0.449274	0.0318065	0.433161	0.450302	0.619507	0.332865	0.219844	0.175499	0.104074	0.137654	0.110487	-0.168863	0.381536	0.226603	0	0.488646	0.623637	0.377324	-0.103211	-0.0866946	0.0901714	-0.346605	0.0392854	0.252468	0.316194	0.323945	0.417682	0.538483	-0.396106	-0.186832	-0.00296317	0.0854832	0.240474
	' 79'	0.0561758	-0.00140117	-0.501519	-0.271792	-0.298216	-0.437334	-0.635695	-0.104922	-0.265561	-0.195599	-0.513608	0.0527779	-0.304848	-0.539358	0.211393	-0.777124	0.0227211	0.0628591	-0.123756	0.786412	0.164894	0.502577	0.417244	0.148865	0.290064	-0.101169	-0.339569	0.432362	0.464973	0.488646	0	0.569632	0.803281	-0.407443	-0.546499	0.0497194	-0.214068	-0.0462035	0.229259	0.451083	0.379684	0.553504	0.867714	-0.71412	-0.229909	0.0753721	0.440686	-0.0535364
RECN	' 87'	0.00464374	-0.490899	-0.574036	-0.284958	-0.449911	-0.264541	-0.376672	0.10816	-0.43025	-0.323592	-0.757891	-0.0903266	-0.610602	-0.927824	0.537615	-0.485571	-0.279546	0.0492235	-0.372318	0.719156	0.55021	0.500008	0.290783	-0.273438	0.358922	-0.370586	-0.317935	0.295246	0.039142	0.623637	0.569632	0	0.632883	-0.172394	-0.592261	0.45685	-0.498935	0.00327355	0.162908	0.877502	0.132031	0.862742	0.706878	-0.315379	-0.069091	0.190836	0.877773	0.51673
	' 30'	0.037524	-0.176555	-0.824872	-0.483825	-0.505199	-0.425792	-1.09479	0.0305687	-0.079404	0.101148	-0.646254	-0.189831	-0.482706	-0.978879	0.429523	-0.641024	-0.204559	-0.113261	-0.244228	1.10341	0.184078	0.676461	0.541646	0.0250228	0.733191	-0.11031	-0.239177	0.930007	0.843309	0.377324	0.803281	0.632883	0	-0.761154	-0.849607	-0.0523742	-0.291184	-0.291172	0.364759	0.885586	0.489263	0.928517	0.662686	-0.72422	-0.212698	0.249397	0.731227	0.0921846
	' 32'	0.164975	0.14735	0.417592	0.42653	0.430115	0.335155	0.629113	0.0648065	0.0524467	-0.194999	0.50517	0.158376	0.55557	0.749374	0.0167627	0.56333	-0.0659198	0.400921	0.205672	-0.45206	-0.241435	-0.409874	-0.437323	-0.245835	-0.450602	-0.0615712	-0.0610513	-0.530151	-0.41694	-0.103211	-0.407443	-0.172394	-0.761154	0	0.984703	0.161933	0.212312	0.00966044	-0.177263	-0.427879	-0.434743	-0.524749	-0.33546	0.373297	0.217562	-0.101743	-0.231388	0.124196
	' 37'	0.332779	0.393895	0.678724	0.443567	0.843002	0.585155	0.818382	-0.167518	0.0376207	0.105875	0.66486	0.27445	0.76254	0.983078	-0.312225	0.607139	0.169865	0.515621	0.705828	-0.530147	-0.275574	-0.623482	-0.581696	-0.0233752	-0.590207	0.327776	0.315139	-0.580126	-0.418702	-0.0866946	-0.546499	-0.592261	-0.849607	0.984703	0	0.0804258	0.522786	-0.05998	-0.138008	-0.630875	-0.410353	-0.756587	-0.546705	0.457027	0.422717	-0.0942924	-0.798311	-0.00151257
	' 67'	0.215912	-0.227219	-0.225886	-0.100888	0.186465	-0.0500338	0.00733809	0.244639	-0.31488	-0.294539	-0.145918	-0.208664	0.131237	0.0606706	0.213084	0.14115	-0.211771	-0.235866	-0.0124411	0.0304259	0.381397	0.0954286	0.0824894	-0.0752449	-0.0832018	-0.292279	-0.496331	-0.0478883	0.0587543	0.0901714	0.0497194	0.45685	-0.0523742	0.161933	0.0804258	0	0.0330662	0.212096	-0.233656	0.2685	-0.256527	0.0756358	-0.0859784	0.278954	0.0770479	-0.174781	0.369985	0.322342
VDMN	' 88'	0.432698	0.534853	0.469101	0.277182	0.828402	0.332731	0.219564	-0.00430946	-0.0261995	0.292482	0.547301	0.102641	0.525875	0.471326	-0.200516	0.363586	-0.00574936	0.0493526	0.246664	-0.218103	-0.163366	-0.0719282	-0.187951	0.437333	-0.336779	0.19915	0.101446	-0.415268	0.115768	-0.346605	-0.214068	-0.498935	-0.291184	0.212312	0.522786	0.0330662	0	0.0349406	-0.175706	-0.326569	-0.458713	-0.298727	-0.327874	0.325246	0.0278275	-0.360934	-0.4113	-0.416297
	' 17'	0.125951	-0.109573	-0.174704	-0.133835	0.0508477	-0.178203	0.0520901	0.100144	-0.163547	-0.275845	-0.0540766	-0.0812645	0.00998092	0.0916321	0.0226541	0.0706103	-0.0177915	0.0353974	0.129632	0.0230796	0.257678	-0.0582041	0.355602	0.317365	-0.365331	0.0622446	-0.0378873	-0.028301	0.139094	0.0392854	-0.0462035	0.00327355	-0.291172	0.00966044	-0.05998	0.212096	0.0349406	0	-0.0562802	-0.127179	0.022933	0.0643535	0.0776384	0.100227	0.06094	-0.367453	0.335422	0.0847425
	' 53'	-0.148108	0.330057	0.172051	-0.26344	0.0875084	0.152779	-0.315789	-0.00568646	0.00880785	0.316853	-0.345547	0.223875	-0.0438608	-0.25672	-0.0857179	-0.276394	-0.144281	0.178209	0.0885136	0.334652	-0.0745802	0.365985	-0.0502298	0.127742	0.565157	0.0975358	-0.0626962	0.28467	0.150856	0.252468	0.229259	0.162908	0.364759	-0.177263	-0.138008	-0.233656	-0.175706	-0.0562802	0	0.372139	0.381639	0.194077	0.479597	-0.263817	-0.00991715	0.556994	-0.0341313	0.137074
	' 58'	0.231343	-0.0589137	-0.44136	-0.496459	-0.180147	-0.226667	-0.771989	0.144427	-0.0327306	0.248513	-0.466407	-0.106671	-0.382684	-0.726478	0.312643	-0.256465	-0.175918	-0.262178	-0.17488	0.811079	0.57982	0.71654	0.426445	-0.153316	0.690913	-0.0742186	-0.422058	0.412224	0.345388	0.316194	0.451083	0.877502	0.885586	-0.427879	-0.630875	0.2685	-0.326569	-0.127179	0.372139	0	0.334936	0.914199	0.449758	-0.220655	-0.169919	0.176107	0.846001	0.211009
	' 65'	-0.281945	0.0312405	-0.230658	-0.446768	-0.354169	-0.231471	-0.56246	-0.143351	0.402202	0.359256	-0.345849	0.195295	-0.334468	-0.609941	0.172321	-0.287445	0.303399	0.127552	-0.0756197	0.329543	0.271286	0.492058	0.376237	0.223519	0.501537	0.319454	-0.0265747	0.808543	0.755396	0.323945	0.379684	0.132031	0.489263	-0.434743	-0.410353	-0.256527	-0.458713	0.022933	0.381639	0.334936	0	0.65007	0.649438	-0.299473	0.184203	0.417488	0.420966	0.281215
	' 71'	-0.0367512	-0.189931	-0.6012	-0.67002	-0.396801	-0.50679	-1.07139	0.176505	-0.129262	0.138135	-0.52456	-0.308894	-0.594758	-0.911499	0.396208	-0.561626	-0.0987659	-0.197691	-0.37164	1.18831	0.432945	1.06173	0.582395	-0.121572	0.45171	0.065628	-0.191159	0.580981	0.657959	0.417682	0.553504	0.862742	0.928517	-0.524749	-0.756587	0.0756358	-0.298727	0.0643535	0.194077	0.914199	0.65007	0	0.914197	-0.50132	-0.186805	0.0352162	1.10578	0.330069
DDMN	' 76'	-0.19674	0.0491225	-0.404043	-0.361748	-0.295044	-0.301991	-0.795535	-0.0711764	-0.144451	0.178372	-0.611268	0.106685	-0.44861	-0.677331	0.32351	-0.591619	-0.0395768	0.206765	-0.141359	0.811272	0.17898	0.790809	0.448604	0.126389	0.464556	0.178348	-0.136612	0.572346	0.558572	0.538483	0.867714	0.706878	0.662686	-0.33546	-0.546705	-0.0859784	-0.327874	0.0776384	0.479597	0.449758	0.649438	0.914197	0	-0.69906	-0.0527212	0.15065	0.62722	0.278289
	' 20'	0.173304	0.173785	0.611013	0.0683706	0.592789	0.631502	0.71614	0.157419	0.232567	0.118846	0.502508	-0.0189025	0.313084	0.721914	-0.22764	0.580948	0.0437058	-0.197245	0.0845581	-0.650579	-0.0132868	-0.391347	-0.34409	-0.0673043	-0.266807	-0.0295668	0.0954505	-0.443633	-0.391779	-0.396106	-0.71412	-0.315379	-0.72422	0.373297	0.457027	0.278954	0.325246	0.100227	-0.263817	-0.220655	-0.299473	-0.50132	-0.69906	0	0.645846	0.0489866	-0.25158	0.309731
	' 22'	-0.280954	0.259444	0.607603	0.00926754	0.355159	0.2437	0.438223	-0.328565	0.276849	0.168221	0.279467	0.701399	0.739521	0.0994466	0.0620961	0.510253	0.23835	0.317204	0.25156	-0.467129	-0.02312	-0.170288	-0.0368726	0.386611	-0.25421	0.366124	0.295685	-0.172182	-0.0174719	-0.186832	-0.229909	-0.069091	-0.212698	0.217562	0.422717	0.0770479	0.0278275	0.06094	-0.00991715	-0.169919	0.184203	-0.186805	-0.0527212	0.645846	0	0.284889	-0.32227	0.44089
	' 31'	-0.201463	-0.0150521	0.0712066	-0.218152	-0.0410126	0.162778	0.0375857	0.0579736	0.292164	0.188998	-0.173281	0.228517	0.0217834	-0.225508	-0.109669	-0.287878	0.08875	0.0436926	0.0421911	-0.0301377	-0.126594	0.100308	-0.156767	-0.173512	0.705756	0.0451793	0.145443	0.516553	-0.13218	-0.00296317	0.0753721	0.190836	0.249397	-0.101743	-0.0942924	-0.174781	-0.360934	-0.367453	0.556994	0.176107	0.417488	0.0352162	0.15065	0.0489866	0.284889	0	-0.0376071	0.220385
	' 42'	0.111314	-0.732766	-0.689311	-0.407732	-0.634277	-0.432823	-0.701244	0.491185	-0.274878	-0.33662	-0.662077	-0.594529	-1.05151	-0.67666	0.356163	-0.381418	-0.353598	-0.354291	-0.664083	0.751884	0.596214	0.611959	0.330495	-0.467336	0.355548	-0.546281	-0.430108	0.31969	0.228573	0.0854832	0.440686	0.877773	0.731227	-0.231388	-0.798311	0.369985	-0.4113	0.335422	-0.0341313	0.846001	0.420966	1.10578	0.62722	-0.25158	-0.32227	-0.0376071	0	0.400383
	' 72'	-0.215499	-0.264362	0.0257444	-0.186743	0.0147525	-0.0103458	0.0407845	0.228288	-0.0389941	-0.0178024	-0.211631	0.032803	-0.0754575	-0.27586	0.0236599	0.133143	-0.0421706	0.0202215	0.0566893	0.188532	0.340767	0.116752	0.0570952	0.00645746	0.0139758	-0.134531	-0.200266	-0.00574805	-0.124769	0.240474	-0.0535364	0.51673	0.0921846	0.124196	-0.00151257	0.322342	-0.416297	0.0847425	0.137074	0.211009	0.281215	0.330069	0.278289	0.309731	0.44089	0.220385	0.400383	0
	' 73'	-0.127447	-0.0612076	0.429162	0.259062	0.2928	0.437217	0.646222	-0.0856725	-0.00338461	-0.348858	0.104032	0.186478	0.444956	0.342297	-0.122208	0.320501	-0.0884959	0.473117	0.308732	-0.518912	-0.0950511	-0.555493	-0.446148	-0.190702	-0.530575	-0.0579144	0.114384	-0.424178	-0.504145	0.097919	-0.247536	0.122193	-0.568346	0.724197	0.641543	0.235546	-0.00243363	-0.00381828	0.0444977	-0.457114	-0.322237	-0.482673	-0.250052	0.442751	0.611267	0.021959	-0.157229	0.278055
	' 80'	0.382939	-0.161709	-0.318163	-0.27988	-0.148446	-0.267746	-0.638795	0.556758	-0.260934	-0.16512	-0.368104	-0.46697	-0.499436	-0.336534	0.187127	-0.221851	-0.347731	-0.342927	-0.296254	0.765021	0.614751	0.590893	0.365533	-0.396654	0.215504	-0.323113	-0.511088	0.0759513	0.191478	0.152425	0.373773	0.450218	0.539895	-0.225573	-0.485827	0.353731	-0.132115	0.302566	-0.0384758	0.743938	0.18468	0.896378	0.440544	-0.161844	-0.482961	-0.249654	0.951512	0.239618
	'100'	-0.137293	0.287754	0.360416	-0.393588	0.285538	0.157305	0.169116	-0.279682	0.198318	0.428646	0.0977263	0.63601	0.583644	0.165313	0.226405	0.205675	0.139756	0.135263	0.0830819	-0.09055	-0.274453	0.00408463	0.1281	0.39651	0.168335	0.422041	0.0828459	0.169847	0.205346	-0.102171	-0.197748	-0.100759	0.123229	0.183199	0.223241	0.0576113	0.0494936	-0.0282804	0.228318	0.0893297	0.305352	-0.00994198	0.00453882	0.198769	0.846293	0.165142	-0.409472	0.199448
neam of ICN		PSN	ASN				BGN			AUN			LGN					VSN				PCN		HVN		SMN				PVN	LECN			RECN					VDMN						DDMN
name of IC		' 68'	' 26'	' 64'	' 66'	' 91'	' 7'	' 23'	' 29'	' 25'	' 44'	' 86'	' 21'	' 34'	' 35'	' 46'	' 57'	' 5'	' 33'	' 49'	' 70'	' 43'	' 82'	' 40'	' 60'	' 12'	' 14'	' 50'	' 51'	' 78'	' 59'	' 79'	' 87'	' 30'	' 32'	' 37'	' 67'	' 88'	' 17'	' 53'	' 58'	' 65'	' 71'	' 76'	' 20'	' 22'	' 31'	' 42'	' 72'
[truncated: 3 more columns]

## Sheet: State 2
neam of ICN	name of IC	Correlations
ASN	' 68'	0	0.0934364	0.255113	0.0236216	0.240249	-0.0730602	-0.117389	-0.0184967	-0.0171927	0.0527655	0.128111	0.154102	0.112953	0.337215	0.151739	0.210508	0.0158773	-0.0791785	0.0790962	0.0320136	0.0794592	-0.0070796	-0.0314805	-0.0782187	0.0710782	-0.0440647	0.266355	-0.16287	0.101868	-0.0675033	-0.233363	-0.211104	-0.118805	-0.0419101	0.120875	-0.158726	0.212587	0.0403276	-0.0561367	-0.182647	-0.211605	-0.135463	0.0415372	0.0467946	-0.110076	-0.201737	-0.304194	-0.311404
	' 26'	0.0934364	0	0.411566	0.248332	0.414341	0.319341	-0.226775	0.242874	-0.0741278	0.600773	0.39791	0.168951	0.0414272	0.268588	0.0477842	0.233057	0.16533	-0.0617382	-0.0266639	0.137842	0.118634	0.115785	0.0481935	0.164482	-0.0791576	0.249257	0.291527	0.235788	0.124147	-0.257579	0.0617964	-0.256871	-0.0135829	0.102022	0.135381	-0.386882	0.283806	0.245117	0.188004	-0.0815307	0.16347	0.125624	0.130702	0.21579	0.0249676	0.0798979	-0.100093	-0.0839446
	' 64'	0.255113	0.411566	0	0.206468	0.228665	0.280158	-0.0902157	0.147867	-0.120556	0.193851	0.0575086	0.399586	-0.00154287	0.502249	0.363904	0.137531	-0.0673087	0.120563	-0.121956	0.103489	-0.0904179	0.0531115	0.0300587	0.177531	-0.115199	0.000356611	0.00330743	0.109506	0.0261487	0.00519777	-0.16993	0.00703023	-0.201852	0.238752	0.0025028	-0.269556	-0.0543754	0.07292	0.220878	0.109591	0.0149649	0.0933717	0.172924	0.354676	0.113187	0.039284	-0.0921835	0.00172321
	' 66'	0.0236216	0.248332	0.206468	0	-0.0720017	0.104904	-0.12587	-0.0199471	-0.055343	0.0673647	-0.0310969	0.141928	0.0182216	0.0697556	0.0165483	0.0235307	0.312089	0.0600003	-0.174682	-0.0663318	-0.223388	-0.0400063	-0.0272787	0.0196084	0.0332863	0.0795641	-0.0660998	0.188706	0.0306356	-0.162413	-0.0289515	-0.119918	0.0876644	0.341842	-0.0339326	-0.0914052	-0.0259381	-0.101986	-0.104671	-0.169624	0.0534979	-0.0956349	-0.0238522	-0.154822	0.0205902	-0.0065322	-0.15741	0.0358356
BGN	' 91'	0.240249	0.414341	0.228665	-0.0720017	0	0.181661	-0.110601	0.155255	-0.0428768	0.182356	0.116694	-0.154825	0.0688267	0.394109	-0.252816	0.312623	-0.168537	-0.0942195	0.566254	0.41322	0.304539	0.0921312	0.110298	-0.045066	-0.103011	0.157672	0.0720974	0.018291	0.00458785	-0.107068	-0.0228101	-0.275807	-0.0336632	0.143009	0.486262	0.106543	0.262095	0.46406	0.374537	0.195631	-0.0511419	0.0790236	0.0392067	0.200561	-0.132941	-0.0310875	-0.102001	-0.152789
	' 7'	-0.0730602	0.319341	0.280158	0.104904	0.181661	0	0.0356627	0.296274	-0.0443047	0.201928	0.00680515	0.173645	0.110499	0.0525377	0.0519274	0.108944	-0.1091	0.00840427	0.0117978	0.0299107	0.0842497	0.100853	-0.04181	0.208634	-0.129677	-0.0429213	-0.135542	0.325036	0.0553382	0.0361392	-0.0432499	0.0943052	0.0482485	0.144023	0.0743613	0.00525423	0.0229712	0.0710484	0.154387	0.11529	0.0827833	0.188965	0.0360384	0.235975	0.216742	0.260549	-0.103576	0.173274
	' 23'	-0.117389	-0.226775	-0.0902157	-0.12587	-0.110601	0.0356627	0	-0.167917	0.0842639	-0.269837	-0.163912	-0.0494802	-0.00654728	0.036121	-0.13539	-0.155719	-0.00978823	0.0148422	0.0417188	-0.16745	-0.147482	-0.146543	-0.0864322	-0.194618	-0.027839	-0.204458	-0.109394	-0.0731333	-0.135429	0.0941167	-0.0374182	0.0270881	-0.0281834	-0.053153	0.0316261	0.121699	0.0724246	-0.263054	-0.169768	-0.169152	-0.176723	-0.0460532	-0.219317	0.150952	0.101763	-0.0346966	-0.0949743	0.0342108
AUN	' 29'	-0.0184967	0.242874	0.147867	-0.0199471	0.155255	0.296274	-0.167917	0	0.000870514	0.191608	0.125119	0.067325	-0.0349457	0.0220497	-0.0381923	0.0361138	-0.14823	-0.0161866	0.00538437	0.0214166	0.0779575	-0.0119946	0.116794	0.24571	0.116644	-0.0687662	-0.158228	0.275913	0.00639723	-0.0105724	-0.0433973	-0.0238942	0.110234	0.0204815	-0.0518141	-0.084153	0.0110127	0.0735732	0.124586	0.0874326	0.106351	0.0400378	0.0085426	0.00307796	-0.0700374	0.279432	0.0849024	0.143369
	' 25'	-0.0171927	-0.0741278	-0.120556	-0.055343	-0.0428768	-0.0443047	0.0842639	0.000870514	0	0.340745	0.193135	0.0623711	0.148651	0.11202	-0.0948556	-0.0359933	0.235363	0.0012478	-0.0366989	-0.263317	0.0430489	-0.0262708	0.00536144	-0.0888511	0.0883595	0.0186967	-0.0350979	0.205526	-0.0479698	-0.131131	0.000895025	-0.0588345	-0.0121909	-0.00333582	-0.0451585	-0.0173108	-0.10364	-0.0887332	-0.0848824	-0.0158529	0.19128	-0.0656702	-0.0265985	0.105805	0.0661419	0.085083	0.0751959	0.00772032
	' 44'	0.0527655	0.600773	0.193851	0.0673647	0.182356	0.201928	-0.269837	0.191608	0.340745	0	0.524797	0.241476	0.268297	0.215748	0.159442	0.147129	0.345408	0.0163968	0.0409656	0.0677104	0.187417	0.158969	0.244538	0.26604	-0.188974	0.344235	0.122535	0.345655	0.186229	-0.0843917	0.0331001	-0.129617	4.65904e-05	0.120343	0.0414776	-0.199279	0.0583761	0.238374	0.210775	0.055614	0.397778	0.184038	0.139765	0.0941169	0.0810668	0.232869	-0.0644337	-0.00941498
LGN	' 86'	0.128111	0.39791	0.0575086	-0.0310969	0.116694	0.00680515	-0.163912	0.125119	0.193135	0.524797	0	0.143312	0.0433061	0.19295	0.0665972	0.10011	0.312315	-0.139336	-0.0772533	0.0516306	0.0700546	-0.0104708	0.0940499	0.0581809	-0.0234567	0.359315	0.454994	0.171054	0.154245	-0.200977	-0.152415	-0.199771	-0.12711	-0.0309666	0.119459	-0.507299	0.286237	0.190417	-0.0249974	-0.184828	-0.00225489	0.0494541	-0.0290308	-0.0101059	-0.186944	0.0327579	-0.221622	-0.262655
	' 21'	0.154102	0.168951	0.399586	0.141928	-0.154825	0.173645	-0.0494802	0.067325	0.0623711	0.241476	0.143312	0	0.396256	0.227486	0.717139	0.13434	0.0507555	0.25984	-0.157086	-0.285746	-0.178157	0.130642	-0.0286413	0.27029	-0.0632214	-0.0980957	-0.0716573	0.183752	0.158395	0.144518	-0.00386724	0.145618	-0.0591998	0.275283	-0.0140686	-0.0875895	0.0740833	-0.0434323	-0.0690052	0.0228368	0.160896	0.0493174	0.112516	0.163549	0.398865	0.0780558	-0.176869	-0.0375817
	' 34'	0.112953	0.0414272	-0.00154287	0.0182216	0.0688267	0.110499	-0.00654728	-0.0349457	0.148651	0.268297	0.0433061	0.396256	0	0.100956	0.537606	0.222643	0.0254854	0.117297	0.23992	-0.010648	0.154292	0.137885	0.0458127	0.178512	-0.0528931	0.176138	-0.266455	0.0963598	-0.0239736	0.260778	0.0157047	0.141041	0.0987436	0.354363	0.173638	0.379117	-0.121957	0.024164	-0.123178	0.14443	0.141794	-0.0664897	-0.142448	0.0664231	0.420175	0.0325875	-0.0739549	0.186635
	' 35'	0.337215	0.268588	0.502249	0.0697556	0.394109	0.0525377	0.036121	0.0220497	0.11202	0.215748	0.19295	0.227486	0.100956	0	0.0910857	0.161636	-0.0574974	0.113688	0.156687	-0.0341514	-0.0734533	-0.00101908	-0.0256738	-0.084565	0.0250546	0.0776923	0.254662	0.0988256	0.0678689	-0.139256	-0.428101	-0.378922	-0.156245	0.281023	0.357134	-0.260732	0.341565	-0.0195555	0.10171	-0.209671	-0.0902476	-0.025988	-0.133714	0.241851	-0.169959	-0.0459075	-0.226113	-0.256475
	' 46'	0.151739	0.0477842	0.363904	0.0165483	-0.252816	0.0519274	-0.13539	-0.0381923	-0.0948556	0.159442	0.0665972	0.717139	0.537606	0.0910857	0	0.358467	-0.00509077	0.154932	-0.213115	-0.198976	-0.174647	0.229549	-0.0872231	0.151178	-0.126336	-0.0127028	-0.0335916	0.0625764	0.152382	0.164777	-0.0574141	0.297857	-0.0779339	0.329511	-0.100443	0.0503113	-0.15131	-0.124379	-0.120663	0.151933	0.0600901	0.077459	0.114192	0.0599921	0.372929	0.033933	0.00969553	0.185455
VSN	' 57'	0.210508	0.233057	0.137531	0.0235307	0.312623	0.108944	-0.155719	0.0361138	-0.0359933	0.147129	0.10011	0.13434	0.222643	0.161636	0.358467	0	-0.135239	-0.134279	-0.184071	-0.0883408	0.0165353	0.220352	-0.0223533	0.0117746	-0.098522	0.119381	0.0462571	-0.0449041	0.0399051	-0.287565	0.149805	0.108632	-0.206038	0.0704703	0.160216	0.105946	-0.0786227	0.100303	-0.0416065	0.351271	0.059049	0.198832	0.185228	0.134409	0.280507	0.0952594	0.173744	0.150205
	' 5'	0.0158773	0.16533	-0.0673087	0.312089	-0.168537	-0.1091	-0.00978823	-0.14823	0.235363	0.345408	0.312315	0.0507555	0.0254854	-0.0574974	-0.00509077	-0.135239	0	0.0405055	-0.125065	-0.139742	-0.101756	-0.035718	0.0850752	-0.00778672	-0.0501848	0.316391	0.109074	0.172233	0.15135	-0.0290651	0.0528117	-0.0796757	0.0656841	0.193805	0.0163443	-0.12642	0.0337329	-0.159172	-0.177895	-0.247354	0.159017	-0.112646	-0.0495909	-0.0758694	0.0927785	0.0566158	-0.0637921	-0.024962
	' 33'	-0.0791785	-0.0617382	0.120563	0.0600003	-0.0942195	0.00840427	0.0148422	-0.0161866	0.0012478	0.0163968	-0.139336	0.25984	0.117297	0.113688	0.154932	-0.134279	0.0405055	0	0.408545	0.37707	-0.0428651	-0.214843	-0.157054	0.164613	-0.186725	-0.092688	-0.0193898	0.101267	-0.122141	0.536872	0.145563	0.33559	0.0352067	0.535526	0.308237	0.1027	0.259559	-0.0295988	0.260875	-0.166687	0.110086	0.0615527	0.096554	-0.394981	-0.216308	0.153962	0.00881737	0.0303676
	' 49'	0.0790962	-0.0266639	-0.121956	-0.174682	0.566254	0.0117978	0.0417188	0.00538437	-0.0366989	0.0409656	-0.0772533	-0.157086	0.23992	0.156687	-0.213115	-0.184071	-0.125065	0.408545	0	0.550286	0.34443	-0.124257	-0.0216086	0.0594798	-0.125213	0.0121521	-0.0210646	-0.0516653	-0.132113	0.494803	-0.0201712	0.0313625	0.190643	0.278653	0.632834	0.293304	0.424119	0.332355	0.448807	0.0196029	0.0127133	0.0039128	-0.0817307	-0.25079	-0.3092	0.0252942	-0.0702756	-0.0165662
PCN	' 70'	0.0320136	0.137842	0.103489	-0.0663318	0.41322	0.0299107	-0.16745	0.0214166	-0.263317	0.0677104	0.0516306	-0.285746	-0.010648	-0.0341514	-0.198976	-0.0883408	-0.139742	0.37707	0.550286	0	0.165086	0.0240951	0.154694	0.0989088	-0.272566	0.212065	0.100932	-0.152555	0.0188534	0.241581	0.0192074	0.00919822	-0.0985428	0.172854	0.467509	0.0401709	0.142501	0.568479	0.62085	0.14126	-0.0704008	0.242137	0.11857	-0.333791	-0.49454	-0.0152943	0.0146865	-0.0516161
	' 43'	0.0794592	0.118634	-0.0904179	-0.223388	0.304539	0.0842497	-0.147482	0.0779575	0.0430489	0.187417	0.0700546	-0.178157	0.154292	-0.0734533	-0.174647	0.0165353	-0.101756	-0.0428651	0.34443	0.165086	0	0.0628502	0.0119288	0.0747918	-0.136681	-0.0158823	-0.0555127	0.0342756	-0.136414	0.187645	0.171338	0.179238	0.0940564	-0.117527	0.159416	0.17826	0.0010488	0.0738693	0.340189	0.316729	0.165387	0.110368	0.00435778	0.160941	0.00466222	0.204583	0.25409	0.248268
HVN	' 82'	-0.0070796	0.115785	0.0531115	-0.0400063	0.0921312	0.100853	-0.146543	-0.0119946	-0.0262708	0.158969	-0.0104708	0.130642	0.137885	-0.00101908	0.229549	0.220352	-0.035718	-0.214843	-0.124257	0.0240951	0.0628502	0	0.0198177	-0.0972847	0.0547424	0.14122	-0.26878	0.0952965	0.204492	-0.113926	0.0362123	0.0364456	-0.011681	0.101412	-0.0897496	0.220879	-0.023942	0.165542	0.117916	0.298814	0.35839	0.369074	0.193217	0.16646	0.272118	0.037596	0.106608	0.265703
	' 40'	-0.0314805	0.0481935	0.0300587	-0.0272787	0.110298	-0.04181	-0.0864322	0.116794	0.00536144	0.244538	0.0940499	-0.0286413	0.0458127	-0.0256738	-0.0872231	-0.0223533	0.0850752	-0.157054	-0.0216086	0.154694	0.0119288	0.0198177	0	0.600454	-0.0931929	0.194793	0.0413845	0.161061	0.233902	7.07976e-05	-0.0787277	-0.144749	-0.271421	-0.0115313	0.0336526	-0.0185538	-0.0279875	0.120714	0.0138576	0.0103567	0.239129	0.171535	0.221051	0.104114	0.0441235	-0.0234878	0.0296525	0.194714
SMN	' 60'	-0.0782187	0.164482	0.177531	0.0196084	-0.045066	0.208634	-0.194618	0.24571	-0.0888511	0.26604	0.0581809	0.27029	0.178512	-0.084565	0.151178	0.0117746	-0.00778672	0.164613	0.0594798	0.0989088	0.0747918	-0.0972847	0.600454	0	-0.149295	0.141065	0.0069931	0.26531	0.223676	0.195694	-0.0431868	0.146277	-0.167879	0.109804	-0.126742	-0.0399925	-0.0928802	0.195205	0.0721602	0.110407	0.302749	0.283013	0.361341	0.10152	0.160531	0.0828808	0.0195505	0.240551
	' 12'	0.0710782	-0.0791576	-0.115199	0.0332863	-0.103011	-0.129677	-0.027839	0.116644	0.0883595	-0.188974	-0.0234567	-0.0632214	-0.0528931	0.0250546	-0.126336	-0.098522	-0.0501848	-0.186725	-0.125213	-0.272566	-0.136681	0.0547424	-0.0931929	-0.149295	0	0.0267257	-0.0397669	0.141349	-0.170694	-0.185176	-0.222242	-0.244555	0.171349	-0.0371116	-0.0557614	-0.155292	-0.0537669	-0.174193	-0.179836	-0.0999945	-0.035108	-0.273365	-0.114316	0.0153668	-0.0260001	-0.0150967	-0.139318	-0.192771
	' 14'	-0.0440647	0.249257	0.000356611	0.0795641	0.157672	-0.0429213	-0.204458	-0.0687662	0.0186967	0.344235	0.359315	-0.0980957	0.176138	0.0776923	-0.0127028	0.119381	0.316391	-0.092688	0.0121521	0.212065	-0.0158823	0.14122	0.194793	0.141065	0.0267257	0	0.278274	0.15246	0.0579239	-0.119306	-0.18012	-0.218522	-0.0378665	0.0798455	0.212392	-0.167166	0.0885006	0.240989	0.0647197	-0.0896578	0.177808	0.131666	0.0186891	-0.0522374	-0.0231334	-0.0345798	-0.0551605	-0.0779163
	' 50'	0.266355	0.291527	0.00330743	-0.0660998	0.0720974	-0.135542	-0.109394	-0.158228	-0.0350979	0.122535	0.454994	-0.0716573	-0.266455	0.254662	-0.0335916	0.0462571	0.109074	-0.0193898	-0.0210646	0.100932	-0.0555127	-0.26878	0.0413845	0.0069931	-0.0397669	0.278274	0	-0.133476	0.0635362	-0.26183	-0.250927	-0.392651	-0.16973	-0.238144	0.233316	-0.612451	0.364768	0.116275	-0.0159996	-0.387774	-0.231534	-0.112032	-0.013789	-0.0457229	-0.301163	-0.174621	-0.276108	-0.415964
PVN	' 51'	-0.16287	0.235788	0.109506	0.188706	0.018291	0.325036	-0.0731333	0.275913	0.205526	0.345655	0.171054	0.183752	0.0963598	0.0988256	0.0625764	-0.0449041	0.172233	0.101267	-0.0516653	-0.152555	0.0342756	0.0952965	0.161061	0.26531	0.141349	0.15246	-0.133476	0	0.157405	-0.0459173	0.0310793	0.0262721	0.231932	0.249897	-0.0741403	-0.0873598	-0.0424861	-0.122563	0.0113014	-0.0144348	0.565349	0.213178	0.0110332	0.0416087	0.141418	0.457167	0.0376815	0.15555
LECN	' 78'	0.101868	0.124147	0.0261487	0.0306356	0.00458785	0.0553382	-0.135429	0.00639723	-0.0479698	0.186229	0.154245	0.158395	-0.0239736	0.0678689	0.152382	0.0399051	0.15135	-0.122141	-0.132113	0.0188534	-0.136414	0.204492	0.233902	0.223676	-0.170694	0.0579239	0.0635362	0.157405	0	-0.023245	-0.00272129	-0.114457	0.105406	0.00714455	-0.0906199	0.00114576	0.061339	0.177879	-0.069979	-0.062614	0.371013	0.281204	0.238414	0.0959202	0.0621229	0.0405188	-0.0537604	-0.0130027
	' 59'	-0.0675033	-0.257579	0.00519777	-0.162413	-0.107068	0.0361392	0.0941167	-0.0105724	-0.131131	-0.0843917	-0.200977	0.144518	0.260778	-0.139256	0.164777	-0.287565	-0.0290651	0.536872	0.494803	0.241581	0.187645	-0.113926	7.07976e-05	0.195694	-0.185176	-0.119306	-0.26183	-0.0459173	-0.023245	0	0.0908118	0.577382	0.167481	0.248621	0.0936468	0.565192	0.0180834	-0.0823896	0.130654	0.185676	0.0775353	0.0845151	-0.0775853	-0.183566	0.0832597	0.0138597	0.0157013	0.378713
	' 79'	-0.233363	0.0617964	-0.16993	-0.0289515	-0.0228101	-0.0432499	-0.0374182	-0.0433973	0.000895025	0.0331001	-0.152415	-0.00386724	0.0157047	-0.428101	-0.0574141	0.149805	0.0528117	0.145563	-0.0201712	0.0192074	0.171338	0.0362123	-0.0787277	-0.0431868	-0.222242	-0.18012	-0.250927	0.0310793	-0.00272129	0.0908118	0	0.324612	0.1466	-0.0195205	-0.0623474	0.269758	-0.0644194	0.0452582	0.0644792	0.228644	0.299042	0.108946	0.273148	-0.186513	0.123838	0.217881	0.404404	0.261044
RECN	' 87'	-0.211104	-0.256871	0.00703023	-0.119918	-0.275807	0.0943052	0.0270881	-0.0238942	-0.0588345	-0.129617	-0.199771	0.145618	0.141041	-0.378922	0.297857	0.108632	-0.0796757	0.33559	0.0313625	0.00919822	0.179238	0.0364456	-0.144749	0.146277	-0.244555	-0.218522	-0.392651	0.0262721	-0.114457	0.577382	0.324612	0	0.0731455	0.0228202	-0.13628	0.591136	-0.363848	-0.0887364	0.104539	0.534344	0.153976	0.375631	0.0678312	0.0285606	0.440315	0.235902	0.386162	0.675913
	' 30'	-0.118805	-0.0135829	-0.201852	0.0876644	-0.0336632	0.0482485	-0.0281834	0.110234	-0.0121909	4.65904e-05	-0.12711	-0.0591998	0.0987436	-0.156245	-0.0779339	-0.206038	0.0656841	0.0352067	0.190643	-0.0985428	0.0940564	-0.011681	-0.271421	-0.167879	0.171349	-0.0378665	-0.16973	0.231932	0.105406	0.167481	0.1466	0.0731455	0	0.137812	0.0547228	0.14043	-0.0718693	-0.00121388	-0.12479	-0.00392873	0.198615	-0.0600897	-0.158586	-0.114429	0.0553466	0.0983948	0.0224566	0.10545
	' 32'	-0.0419101	0.102022	0.238752	0.341842	0.143009	0.144023	-0.053153	0.0204815	-0.00333582	0.120343	-0.0309666	0.275283	0.354363	0.281023	0.329511	0.0704703	0.193805	0.535526	0.278653	0.172854	-0.117527	0.101412	-0.0115313	0.109804	-0.0371116	0.0798455	-0.238144	0.249897	0.00714455	0.248621	-0.0195205	0.0228202	0.137812	0	0.305501	0.123852	0.186346	0.0559423	0.15019	-0.0547447	0.126148	-0.0471563	-0.018321	-0.228007	-0.0587982	0.0324765	-0.141506	0.0108471
	' 37'	0.120875	0.135381	0.0025028	-0.0339326	0.486262	0.0743613	0.0316261	-0.0518141	-0.0451585	0.0414776	0.119459	-0.0140686	0.173638	0.357134	-0.100443	0.160216	0.0163443	0.308237	0.632834	0.467509	0.159416	-0.0897496	0.0336526	-0.126742	-0.0557614	0.212392	0.233316	-0.0741403	-0.0906199	0.0936468	-0.0623474	-0.13628	0.0547228	0.305501	0	0.0890385	0.385582	0.229522	0.235494	-0.0574977	-0.118046	-0.0193779	-0.148349	-0.157758	-0.127448	0.0335341	-0.138687	-0.191807
	' 67'	-0.158726	-0.386882	-0.269556	-0.0914052	0.106543	0.00525423	0.121699	-0.084153	-0.0173108	-0.199279	-0.507299	-0.0875895	0.379117	-0.260732	0.0503113	0.105946	-0.12642	0.1027	0.293304	0.0401709	0.17826	0.220879	-0.0185538	-0.0399925	-0.155292	-0.167166	-0.612451	-0.0873598	0.00114576	0.565192	0.269758	0.591136	0.14043	0.123852	0.0890385	0	-0.173306	0.0508267	-0.00442594	0.5223	0.1178	0.157847	-0.0766469	0.0909642	0.538855	0.0751818	0.251391	0.648002
VDMN	' 88'	0.212587	0.283806	-0.0543754	-0.0259381	0.262095	0.0229712	0.0724246	0.0110127	-0.10364	0.0583761	0.286237	0.0740833	-0.121957	0.341565	-0.15131	-0.0786227	0.0337329	0.259559	0.424119	0.142501	0.0010488	-0.023942	-0.0279875	-0.0928802	-0.0537669	0.0885006	0.364768	-0.0424861	0.061339	0.0180834	-0.0644194	-0.363848	-0.0718693	0.186346	0.385582	-0.173306	0	0.0731156	0.109488	-0.540895	-0.132017	-0.0820159	-0.0313302	-0.233	-0.356721	-0.0931469	-0.394717	-0.439157
	' 17'	0.0403276	0.245117	0.07292	-0.101986	0.46406	0.0710484	-0.263054	0.0735732	-0.0887332	0.238374	0.190417	-0.0434323	0.024164	-0.0195555	-0.124379	0.100303	-0.159172	-0.0295988	0.332355	0.568479	0.0738693	0.165542	0.120714	0.195205	-0.174193	0.240989	0.116275	-0.122563	0.177879	-0.0823896	0.0452582	-0.0887364	-0.00121388	0.0559423	0.229522	0.0508267	0.0731156	0	0.457359	0.210474	0.122462	0.176673	0.278939	0.0465029	-0.129801	0.0434765	0.0221352	-0.0671106
	' 53'	-0.0561367	0.188004	0.220878	-0.104671	0.374537	0.154387	-0.169768	0.124586	-0.0848824	0.210775	-0.0249974	-0.0690052	-0.123178	0.10171	-0.120663	-0.0416065	-0.177895	0.260875	0.448807	0.62085	0.340189	0.117916	0.0138576	0.0721602	-0.179836	0.0647197	-0.0159996	0.0113014	-0.069979	0.130654	0.0644792	0.104539	-0.12479	0.15019	0.235494	-0.00442594	0.109488	0.457359	0	0.383264	0.142973	0.306506	0.227806	-0.180444	-0.305165	0.198758	0.191841	0.032895
	' 58'	-0.182647	-0.0815307	0.109591	-0.169624	0.195631	0.11529	-0.169152	0.0874326	-0.0158529	0.055614	-0.184828	0.0228368	0.14443	-0.209671	0.151933	0.351271	-0.247354	-0.166687	0.0196029	0.14126	0.316729	0.298814	0.0103567	0.110407	-0.0999945	-0.0896578	-0.387774	-0.0144348	-0.062614	0.185676	0.228644	0.534344	-0.00392873	-0.0547447	-0.0574977	0.5223	-0.540895	0.210474	0.383264	0	0.183538	0.314801	0.0885608	0.214729	0.352604	0.193844	0.502063	0.604412
	' 65'	-0.211605	0.16347	0.0149649	0.0534979	-0.0511419	0.0827833	-0.176723	0.106351	0.19128	0.397778	-0.00225489	0.160896	0.141794	-0.0902476	0.0600901	0.059049	0.159017	0.110086	0.0127133	-0.0704008	0.165387	0.35839	0.239129	0.302749	-0.035108	0.177808	-0.231534	0.565349	0.371013	0.0775353	0.299042	0.153976	0.198615	0.126148	-0.118046	0.1178	-0.132017	0.122462	0.142973	0.183538	0	0.438216	0.362299	0.148133	0.313096	0.482969	0.322868	0.315975
	' 71'	-0.135463	0.125624	0.0933717	-0.0956349	0.0790236	0.188965	-0.0460532	0.0400378	-0.0656702	0.184038	0.0494541	0.0493174	-0.0664897	-0.025988	0.077459	0.198832	-0.112646	0.0615527	0.0039128	0.242137	0.110368	0.369074	0.171535	0.283013	-0.273365	0.131666	-0.112032	0.213178	0.281204	0.0845151	0.108946	0.375631	-0.0600897	-0.0471563	-0.0193779	0.157847	-0.0820159	0.176673	0.306506	0.314801	0.438216	0	0.336816	0.170763	0.176048	0.269727	0.39787	0.37608
DDMN	' 76'	0.0415372	0.130702	0.172924	-0.0238522	0.0392067	0.0360384	-0.219317	0.0085426	-0.0265985	0.139765	-0.0290308	0.112516	-0.142448	-0.133714	0.114192	0.185228	-0.0495909	0.096554	-0.0817307	0.11857	0.00435778	0.193217	0.221051	0.361341	-0.114316	0.0186891	-0.013789	0.0110332	0.238414	-0.0775853	0.273148	0.0678312	-0.158586	-0.018321	-0.148349	-0.0766469	-0.0313302	0.278939	0.227806	0.0885608	0.362299	0.336816	0	-0.0576998	0.0323088	0.10669	0.142249	0.0482366
	' 20'	0.0467946	0.21579	0.354676	-0.154822	0.200561	0.235975	0.150952	0.00307796	0.105805	0.0941169	-0.0101059	0.163549	0.0664231	0.241851	0.0599921	0.134409	-0.0758694	-0.394981	-0.25079	-0.333791	0.160941	0.16646	0.104114	0.10152	0.0153668	-0.0522374	-0.0457229	0.0416087	0.0959202	-0.183566	-0.186513	0.0285606	-0.114429	-0.228007	-0.157758	0.0909642	-0.233	0.0465029	-0.180444	0.214729	0.148133	0.170763	-0.0576998	0	0.560511	0.0710401	0.0680488	0.33747
	' 22'	-0.110076	0.0249676	0.113187	0.0205902	-0.132941	0.216742	0.101763	-0.0700374	0.0661419	0.0810668	-0.186944	0.398865	0.420175	-0.169959	0.372929	0.280507	0.0927785	-0.216308	-0.3092	-0.49454	0.00466222	0.272118	0.0441235	0.160531	-0.0260001	-0.0231334	-0.301163	0.141418	0.0621229	0.0832597	0.123838	0.440315	0.0553466	-0.0587982	-0.127448	0.538855	-0.356721	-0.129801	-0.305165	0.352604	0.313096	0.176048	0.0323088	0.560511	0	0.0909971	0.139559	0.582412
	' 31'	-0.201737	0.0798979	0.039284	-0.0065322	-0.0310875	0.260549	-0.0346966	0.279432	0.085083	0.232869	0.0327579	0.0780558	0.0325875	-0.0459075	0.033933	0.0952594	0.0566158	0.153962	0.0252942	-0.0152943	0.204583	0.037596	-0.0234878	0.0828808	-0.0150967	-0.0345798	-0.174621	0.457167	0.0405188	0.0138597	0.217881	0.235902	0.0983948	0.0324765	0.0335341	0.0751818	-0.0931469	0.0434765	0.198758	0.193844	0.482969	0.269727	0.10669	0.0710401	0.0909971	0	0.353429	0.268841
	' 42'	-0.304194	-0.100093	-0.0921835	-0.15741	-0.102001	-0.103576	-0.0949743	0.0849024	0.0751959	-0.0644337	-0.221622	-0.176869	-0.0739549	-0.226113	0.00969553	0.173744	-0.0637921	0.00881737	-0.0702756	0.0146865	0.25409	0.106608	0.0296525	0.0195505	-0.139318	-0.0551605	-0.276108	0.0376815	-0.0537604	0.0157013	0.404404	0.386162	0.0224566	-0.141506	-0.138687	0.251391	-0.394717	0.0221352	0.191841	0.502063	0.322868	0.39787	0.142249	0.0680488	0.139559	0.353429	0	0.415346
	' 72'	-0.311404	-0.0839446	0.00172321	0.0358356	-0.152789	0.173274	0.0342108	0.143369	0.00772032	-0.00941498	-0.262655	-0.0375817	0.186635	-0.256475	0.185455	0.150205	-0.024962	0.0303676	-0.0165662	-0.0516161	0.248268	0.265703	0.194714	0.240551	-0.192771	-0.0779163	-0.415964	0.15555	-0.0130027	0.378713	0.261044	0.675913	0.10545	0.0108471	-0.191807	0.648002	-0.439157	-0.0671106	0.032895	0.604412	0.315975	0.37608	0.0482366	0.33747	0.582412	0.268841	0.415346	0
	' 73'	-0.202676	-0.345364	0.115227	-0.0356924	-0.0631161	0.0955737	0.18272	-0.144837	-0.000609508	-0.33298	-0.492814	0.0684558	0.176197	-0.0891306	0.143201	-0.0942205	-0.163796	0.402734	0.300841	-0.0268718	0.0509813	-0.0693773	-0.0983025	0.0553581	-0.10823	-0.144462	-0.4228	-0.00230734	-0.17378	0.611088	0.214669	0.697805	0.127984	0.215263	0.102689	0.613754	-0.0843256	-0.21797	0.136247	0.252549	0.0772106	0.123821	-0.0476567	0.0195527	0.386771	0.0557748	0.202632	0.407331
	' 80'	0.0898357	0.0994085	0.168727	-0.193748	0.20188	-0.0429629	-0.258946	-0.0664275	-0.16181	0.00107488	0.0883778	-0.0829707	-0.0166271	0.100352	0.138473	0.341357	-0.201418	-0.0562592	0.0416656	0.289941	0.357774	0.254278	0.00363715	0.0453232	-0.166127	0.0784578	0.0963309	-0.163376	-0.00237557	0.0129471	0.105728	0.246545	-0.246215	-0.177865	0.0891218	0.0707296	-0.121356	0.193234	0.339703	0.48171	0.0120049	0.417591	0.191403	0.224296	-0.019513	0.017708	0.31594	0.310171
	'100'	-0.00427198	-0.0560685	0.0132981	-0.0323883	-0.0287858	0.118646	0.0881164	-0.0171675	0.00880809	0.102542	-0.03254	0.403295	0.48766	0.196821	0.400833	0.17673	0.067444	-0.0510974	-0.0629036	-0.307152	-0.110691	0.309887	0.0710295	0.0987946	0.081992	0.0103069	-0.228885	0.139328	0.170074	0.0365859	-0.144994	0.0649742	0.0431697	0.311811	0.12306	0.308903	-0.0480123	-0.0329254	-0.343765	0.0939807	0.145123	-0.030294	-0.191429	0.303219	0.621053	-0.129328	-0.10551	0.253023
neam of ICN		ICN	PSN	ASN				BGN			AUN			LGN					VSN				PCN		HVN		SMN				PVN	LECN			RECN					VDMN						DDMN
name of IC		' 68'	' 26'	' 64'	' 66'	' 91'	' 7'	' 23'	' 29'	' 25'	' 44'	' 86'	' 21'	' 34'	' 35'	' 46'	' 57'	' 5'	' 33'	' 49'	' 70'	' 43'	' 82'	' 40'	' 60'	' 12'	' 14'	' 50'	' 51'	' 78'	' 59'	' 79'	' 87'	' 30'	' 32'	' 37'	' 67'	' 88'	' 17'	' 53'	' 58'	' 65'	' 71'	' 76'	' 20'	' 22'	' 31'	' 42'	' 72'
[truncated: 3 more columns]

## Sheet: State 1
neam of ICN	name of IC	Correlations
ASN	' 68'	0	0.181049	0.197799	0.0849623	0.381609	-0.0827901	0.0701568	0.123889	0.0731608	0.0562361	-0.00386758	0.0952232	0.0947142	0.384972	0.035176	0.260068	-0.16729	-0.204866	0.147543	-0.257299	-0.0458988	-0.0794881	-0.0562557	-0.218935	0.247047	-0.129094	0.157609	0.0311805	-0.0880579	-0.0760163	-0.15701	-0.0900473	0.0799774	0.0111527	0.13312	0.0817992	0.0668079	-0.147479	-0.0574636	0.0322043	-0.121994	-0.129765	-0.162135	0.248778	0.200592	-0.0118838	-0.253767	-0.0228302
	' 26'	0.181049	0	0.507168	0.114638	0.455189	0.354004	-0.283745	0.386775	0.0411145	0.260895	0.382741	0.217239	0.0728726	0.505357	0.0481467	0.201113	-0.0358607	0.140363	0.28911	0.0944464	0.308487	-0.0904889	0.295648	0.326617	-0.102782	0.0276389	0.214511	0.350297	-0.0818638	0.0671646	0.00430463	0.0568512	-0.194569	0.352097	0.224144	-0.174296	0.413603	0.043893	0.34624	0.152612	0.213562	0.0142269	0.074874	0.368093	0.119715	0.0549016	-0.0951329	0.289134
	' 64'	0.197799	0.507168	0	0.0410539	0.378097	0.443637	-0.109182	0.253527	-0.0654547	0.178437	-0.0259982	0.454312	0.197813	0.416011	0.137308	-0.0255934	-0.069377	0.161504	0.148154	0.0442291	0.418917	-0.0538414	0.294481	0.344424	-0.0167635	-0.225006	-0.238353	0.220711	-0.111504	0.484212	-0.166776	0.301306	-0.0394073	0.277052	0.0811245	0.151401	-0.0107696	-0.014777	0.38317	0.448861	0.105818	0.0177003	0.0437927	0.649585	0.36311	-0.00946276	-0.0491084	0.451472
	' 66'	0.0849623	0.114638	0.0410539	0	-0.203703	-0.0899365	-0.0486361	-0.0867475	0.137642	0.0166377	0.239074	0.0398058	-0.261533	0.101932	-0.00796941	-0.00155681	0.411686	-0.0249204	-0.216641	-0.210479	-0.384288	0.113665	-0.17071	-0.0347648	0.0936362	0.190724	0.193148	0.0509377	-0.0262225	-0.288348	-0.0653465	-0.289171	0.0182774	0.161286	-0.0333218	-0.375649	-0.0285263	-0.228424	-0.265284	-0.301083	-0.00386407	-0.010955	0.0314353	-0.187982	-0.157385	0.0167848	-0.241071	-0.265359
BGN	' 91'	0.381609	0.455189	0.378097	-0.203703	0	0.190057	-0.196421	0.222877	-0.116507	0.284345	-0.0235222	-0.0780496	0.376972	0.34929	-0.12729	0.423055	-0.328348	0.0939205	0.861958	0.427622	0.455685	-0.0720388	0.482171	0.15789	-0.0441779	0.0803913	0.0521836	0.191472	-0.127685	0.186821	-0.0800493	0.065957	-0.0742925	0.419925	0.546769	0.445013	0.390308	0.287238	0.494821	0.479896	0.14087	0.0784906	-0.0187521	0.309253	0.326711	-0.106277	0.00122564	0.31389
	' 7'	-0.0827901	0.354004	0.443637	-0.0899365	0.190057	0	-0.0564502	0.311159	0.0115627	0.0687604	-0.00432476	0.120445	0.141086	0.0721295	-0.00874672	-0.0532778	-0.124537	0.0228171	0.14603	0.0195275	0.327559	0.017887	0.122002	0.0496683	0.0150954	-0.0636686	-0.088487	0.207219	-0.0826923	0.207573	-0.14014	0.20278	0.110962	0.108754	0.109507	0.187194	0.0483876	-0.0271372	0.209444	0.240494	0.00897528	0.0863956	-0.0901803	0.295138	0.21588	0.0405075	-0.000233361	0.301615
	' 23'	0.0701568	-0.283745	-0.109182	-0.0486361	-0.196421	-0.0564502	0	-0.0635559	0.144361	-0.293672	-0.120855	0.0149594	0.0317313	0.0707014	0.0557907	-0.114218	-0.103181	0.0592488	-0.0447721	-0.265716	-0.320765	-0.375388	-0.368414	-0.421658	0.0501357	-0.205675	0.0860193	-0.102483	-0.238686	0.054761	0.0637473	-0.0121114	0.213687	-0.169659	0.0694594	-0.0501167	-0.140369	-0.342469	-0.450712	-0.34105	-0.297378	-0.212838	-0.27419	-0.0416782	-0.0127175	0.178477	-0.268257	-0.250856
AUN	' 29'	0.123889	0.386775	0.253527	-0.0867475	0.222877	0.311159	-0.0635559	0	-0.0569555	-0.0751385	0.0428179	0.0266672	-0.019825	0.054344	-0.149143	0.0162562	-0.460863	-0.198361	0.196295	-0.0629598	0.321314	-0.255083	0.245653	0.140531	0.268831	-0.38661	-0.256603	0.405634	-0.223017	0.136758	-0.120778	0.161849	0.0641023	0.0447387	0.0885359	0.0945222	-0.0091414	-0.0742544	0.1755	0.3106	-0.102265	-0.1267	-0.129099	0.23499	0.0998201	0.182347	0.120501	0.304589
	' 25'	0.0731608	0.0411145	-0.0654547	0.137642	-0.116507	0.0115627	0.144361	-0.0569555	0	0.364403	0.407129	0.0390355	-0.0270002	0.0692817	0.0951311	0.0856164	0.426693	0.0359959	-0.113454	-0.162179	0.00527847	0.0443886	-0.0572151	-0.241433	-0.125068	0.135579	0.0620513	0.110154	0.0912525	-0.087416	0.0958901	0.0427989	-0.0454687	0.0481016	-0.0556254	-0.0363279	-0.161756	-0.172039	-0.0652086	-0.0152304	0.257498	0.275933	-0.0369731	0.142859	0.101053	0.181978	0.187571	-0.071367
	' 44'	0.0562361	0.260895	0.178437	0.0166377	0.284345	0.0687604	-0.293672	-0.0751385	0.364403	0	0.397713	0.31927	0.325567	0.143752	0.395922	0.414494	0.320173	0.299399	0.174906	0.228307	0.0916159	0.309499	0.468419	0.414227	-0.325797	0.30258	0.0295698	0.198496	0.343027	0.0473648	0.0283293	0.0808002	-0.365395	0.348423	0.266069	0.0779207	0.132389	0.395769	0.37124	0.240033	0.561855	0.351717	0.294657	0.0370588	0.117155	0.0327034	0.303389	0.287671
LGN	' 86'	-0.00386758	0.382741	-0.0259982	0.239074	-0.0235222	-0.00432476	-0.120855	0.0428179	0.407129	0.397713	0	0.162237	-0.147599	0.170303	0.0633406	0.191188	0.466446	0.124956	0.0557571	-0.0212266	-0.0388185	0.111343	0.161676	0.151518	-0.276828	0.396734	0.2335	0.141463	0.177343	-0.012991	0.0575485	-0.066818	-0.269427	0.242961	0.108173	-0.269444	0.317775	-0.031613	-0.0206956	-0.184807	0.271392	0.202817	0.147047	-0.0647357	-0.136423	-0.00137035	-0.0136658	-0.120872
	' 21'	0.0952232	0.217239	0.454312	0.0398058	-0.0780496	0.120445	0.0149594	0.0266672	0.0390355	0.31927	0.162237	0	0.423853	0.195928	0.698343	0.08259	0.0389608	0.540024	0.0634798	0.00707348	-0.0391348	0.0291548	0.177144	0.405534	-0.108383	-0.0426474	-0.0975341	0.181797	-0.046308	0.436494	-0.078315	0.349375	-0.134013	0.392003	0.259205	0.0427088	-0.0248663	0.057887	0.232955	0.00533453	0.234755	0.0916907	0.123222	0.0480653	0.23531	0.000408393	-0.0390215	0.147574
	' 34'	0.0947142	0.0728726	0.197813	-0.261533	0.376972	0.141086	0.0317313	-0.019825	-0.0270002	0.325567	-0.147599	0.423853	0	-0.0059752	0.395464	0.158104	-0.0877025	0.37713	0.537441	0.192897	0.321215	-0.054396	0.393081	0.252012	-0.0488368	0.0153031	-0.301745	0.0877077	-0.132711	0.664813	-0.101581	0.352015	0.111258	0.254228	0.459533	0.740127	0.0256586	0.198533	0.147701	0.457433	0.0487158	-0.0816608	-0.146133	0.273278	0.692481	-0.0947718	-0.0317458	0.433846
	' 35'	0.384972	0.505357	0.416011	0.101932	0.34929	0.0721295	0.0707014	0.054344	0.0692817	0.143752	0.170303	0.195928	-0.0059752	0	-0.0774866	0.0332904	-0.128841	0.123446	0.38022	-0.0521083	-0.0241117	-0.305675	-0.128618	-0.0939969	0.0890879	-0.08395	0.304914	0.066611	-0.310928	0.0278678	-0.159352	-0.247147	-0.00100439	0.315945	0.270036	-0.17637	0.366431	-0.263014	0.121922	-0.178733	-0.100282	-0.189766	-0.207868	0.249893	-0.10737	0.203264	-0.318067	-0.165745
	' 46'	0.035176	0.0481467	0.137308	-0.00796941	-0.12729	-0.00874672	0.0557907	-0.149143	0.0951311	0.395922	0.0633406	0.698343	0.395464	-0.0774866	0	0.381914	0.0335053	0.510053	-0.0380215	0.142826	-0.0127319	0.073496	0.119493	0.232869	-0.122032	0.00578114	-0.0473127	0.182551	0.115875	0.310221	-0.0666571	0.362171	-0.142398	0.213993	0.120998	-0.00411338	-0.135621	0.137026	0.193805	0.138409	0.276743	0.0348711	0.125626	-0.173339	0.164222	0.117599	0.109039	0.115001
VSN	' 57'	0.260068	0.201113	-0.0255934	-0.00155681	0.423055	-0.0532778	-0.114218	0.0162562	0.0856164	0.414494	0.191188	0.08259	0.158104	0.0332904	0.381914	0	-0.0885144	0.0587684	0.225468	0.132676	-0.00985799	0.0716283	0.153295	0.0338161	-0.191122	0.18436	0.170569	0.0496235	0.0174181	-0.109107	0.202338	0.238764	-0.228408	0.203834	0.421362	0.175664	0.0923882	0.200812	0.204885	0.36133	0.106875	0.0157613	0.190646	-0.0647488	0.214447	0.0568988	0.0902657	0.247802
	' 5'	-0.16729	-0.0358607	-0.069377	0.411686	-0.328348	-0.124537	-0.103181	-0.460863	0.426693	0.320173	0.466446	0.0389608	-0.0877025	-0.128841	0.0335053	-0.0885144	0	0.0744488	-0.275438	0.00105628	-0.189688	0.326224	0.0614931	0.0688373	-0.325496	0.504722	0.202727	-0.0704495	0.306894	-0.138526	0.07901	-0.156203	-0.191885	0.193245	-0.153251	-0.162897	-0.00193267	0.0151534	-0.0847021	-0.205099	0.31591	0.294011	0.144367	-0.151119	-0.127708	-0.121473	0.16864	-0.224127
	' 33'	-0.204866	0.140363	0.161504	-0.0249204	0.0939205	0.0228171	0.0592488	-0.198361	0.0359959	0.299399	0.124956	0.540024	0.37713	0.123446	0.510053	0.0587684	0.0744488	0	0.360365	0.548236	0.00164022	-0.257726	0.1451	0.324824	-0.27283	0.089611	0.180883	0.108914	0.0296638	0.451996	0.052593	0.368483	-0.0677285	0.54578	0.58011	0.0246244	0.151006	0.205191	0.297033	-0.061194	0.217577	0.200414	0.0401927	-0.260534	-0.0390156	-0.0994683	0.0134691	0.0444821
	' 49'	0.147543	0.28911	0.148154	-0.216641	0.861958	0.14603	-0.0447721	0.196295	-0.113454	0.174906	0.0557571	0.0634798	0.537441	0.38022	-0.0380215	0.225468	-0.275438	0.360365	0	0.521936	0.270885	-0.295431	0.315293	0.139897	-0.0629663	0.00762829	0.200284	0.197825	-0.279326	0.454339	-0.101232	0.096974	0.0846822	0.399613	0.863967	0.363214	0.58997	0.167696	0.337715	0.181759	-0.00836693	-0.0871939	-0.202817	0.102155	0.0545566	0.0189882	-0.174687	0.157046
PCN	' 70'	-0.257299	0.0944464	0.0442291	-0.210479	0.427622	0.0195275	-0.265716	-0.0629598	-0.162179	0.228307	-0.0212266	0.00707348	0.192897	-0.0521083	0.142826	0.132676	0.00105628	0.548236	0.521936	0	0.197874	0.0556572	0.463239	0.469275	-0.303837	0.181171	0.0177416	0.0162566	0.151508	0.232669	0.0831618	0.247232	-0.139525	0.390704	0.446824	0.198266	0.267046	0.658547	0.68975	0.312631	0.272962	0.355895	0.21215	-0.197086	-0.152913	-0.251216	0.235132	0.246835
	' 43'	-0.0458988	0.308487	0.418917	-0.384288	0.455685	0.327559	-0.320765	0.321314	0.00527847	0.0916159	-0.0388185	-0.0391348	0.321215	-0.0241117	-0.0127319	-0.00985799	-0.189688	0.00164022	0.270885	0.197874	0	-0.0524409	0.276904	0.138334	-0.0282013	-0.207955	-0.402645	0.135132	-0.0708523	0.60863	-0.00854439	0.374597	0.0962646	0.0999845	0.0917802	0.492385	-0.000629549	0.155547	0.5482	0.836516	0.072334	0.0406247	-0.0528264	0.506885	0.455984	0.036203	0.314371	0.722137
HVN	' 82'	-0.0794881	-0.0904889	-0.0538414	0.113665	-0.0720388	0.017887	-0.375388	-0.255083	0.0443886	0.309499	0.111343	0.0291548	-0.054396	-0.305675	0.073496	0.0716283	0.326224	-0.257726	-0.295431	0.0556572	-0.0524409	0	0.230999	0.0885988	-0.147686	0.3701	-0.184824	0.0139239	0.597029	-0.173239	-0.162591	-0.290612	-0.32428	-0.00121838	-0.300986	-0.0770083	0.104323	0.353185	0.242341	-0.00538964	0.708723	0.547593	0.503052	-0.100372	-0.0241901	-0.242408	0.386231	-0.0529522
	' 40'	-0.0562557	0.295648	0.294481	-0.17071	0.482171	0.122002	-0.368414	0.245653	-0.0572151	0.468419	0.161676	0.177144	0.393081	-0.128618	0.119493	0.153295	0.0614931	0.1451	0.315293	0.463239	0.276904	0.230999	0	0.934421	-0.139412	0.167767	-0.155501	0.135586	0.300556	0.208469	-0.118737	0.184479	-0.352209	0.31769	0.227935	0.316204	0.165807	0.492608	0.621823	0.398363	0.440204	0.297359	0.304489	0.190045	0.258961	-0.166011	0.304563	0.444917
SMN	' 60'	-0.218935	0.326617	0.344424	-0.0347648	0.15789	0.0496683	-0.421658	0.140531	-0.241433	0.414227	0.151518	0.405534	0.252012	-0.0939969	0.232869	0.0338161	0.0688373	0.324824	0.139897	0.469275	0.138334	0.0885988	0.934421	0	-0.247114	0.144498	-0.152666	0.15646	0.370623	0.303137	-0.123093	0.174458	-0.391006	0.357029	0.0966324	-0.0105046	0.137163	0.503621	0.503767	0.214969	0.3121	0.184005	0.418659	-0.0183341	0.133186	-0.25189	0.109417	0.297237
	' 12'	0.247047	-0.102782	-0.0167635	0.0936362	-0.0441779	0.0150954	0.0501357	0.268831	-0.125068	-0.325797	-0.276828	-0.108383	-0.0488368	0.0890879	-0.122032	-0.191122	-0.325496	-0.27283	-0.0629663	-0.303837	-0.0282013	-0.147686	-0.139412	-0.247114	0	-0.271853	-0.112837	0.0682078	-0.352731	-0.0648523	-0.148933	-0.15676	0.318322	-0.137597	-0.164453	0.0158357	-0.1918	-0.314085	-0.201979	-0.0255624	-0.274305	-0.345665	-0.318006	0.0407881	0.0457718	0.101202	-0.296499	-0.0976254
	' 14'	-0.129094	0.0276389	-0.225006	0.190724	0.0803913	-0.0636686	-0.205675	-0.38661	0.135579	0.30258	0.396734	-0.0426474	0.0153031	-0.08395	0.00578114	0.18436	0.504722	0.089611	0.00762829	0.181171	-0.207955	0.3701	0.167767	0.144498	-0.271853	0	0.309668	-0.104117	0.323162	-0.238006	-0.00466913	-0.166926	-0.258638	0.116318	0.0561032	-0.115793	0.270796	0.351727	0.0990295	-0.0727012	0.405229	0.324151	0.286875	-0.220993	-0.0728434	-0.133487	0.155142	-0.0921812
	' 50'	0.157609	0.214511	-0.238353	0.193148	0.0521836	-0.088487	0.0860193	-0.256603	0.0620513	0.0295698	0.2335	-0.0975341	-0.301745	0.304914	-0.0473127	0.170569	0.202727	0.180883	0.200284	0.0177416	-0.402645	-0.184824	-0.155501	-0.152666	-0.112837	0.309668	0	-0.0582027	0.0437672	-0.357324	-0.163804	-0.211306	-0.0944779	-0.0325165	0.226418	-0.450281	0.385274	-0.00984357	-0.141279	-0.488522	-0.0608518	-0.0388814	-0.0289878	-0.207002	-0.298343	-0.0318616	-0.423247	-0.29663
PVN	' 51'	0.0311805	0.350297	0.220711	0.0509377	0.191472	0.207219	-0.102483	0.405634	0.110154	0.198496	0.141463	0.181797	0.0877077	0.066611	0.182551	0.0496235	-0.0704495	0.108914	0.197825	0.0162566	0.135132	0.0139239	0.135586	0.15646	0.0682078	-0.104117	-0.0582027	0	-0.0541267	0.0821837	-0.0882873	0.171999	0.133464	0.269582	0.150181	0.0747635	0.0536504	-0.0604184	0.23856	0.166518	0.117794	0.0190092	-0.035549	0.148893	0.0683349	0.493062	0.0651344	0.21071
LECN	' 78'	-0.0880579	-0.0818638	-0.111504	-0.0262225	-0.127685	-0.0826923	-0.238686	-0.223017	0.0912525	0.343027	0.177343	-0.046308	-0.132711	-0.310928	0.115875	0.0174181	0.306894	0.0296638	-0.279326	0.151508	-0.0708523	0.597029	0.300556	0.370623	-0.352731	0.323162	0.0437672	-0.0541267	0	-0.190563	-0.0100436	-0.205336	-0.311778	0.0436079	-0.255542	-0.184504	0.0620529	0.380962	0.0969721	-0.0537731	0.673165	0.624811	0.541468	-0.133113	-0.0776191	-0.177959	0.358498	0.0261723
	' 59'	-0.0760163	0.0671646	0.484212	-0.288348	0.186821	0.207573	0.054761	0.136758	-0.087416	0.0473648	-0.012991	0.436494	0.664813	0.0278678	0.310221	-0.109107	-0.138526	0.451996	0.454339	0.232669	0.60863	-0.173239	0.208469	0.303137	-0.0648523	-0.238006	-0.357324	0.0821837	-0.190563	0	-0.0313365	0.611999	0.148893	0.354597	0.241644	0.515579	-0.123576	0.077394	0.250557	0.471745	0.0618502	-0.0212289	-0.169117	0.236087	0.419282	-0.0674207	0.0853455	0.564454
	' 79'	-0.15701	0.00430463	-0.166776	-0.0653465	-0.0800493	-0.14014	0.0637473	-0.120778	0.0958901	0.0283293	0.0575485	-0.078315	-0.101581	-0.159352	-0.0666571	0.202338	0.07901	0.052593	-0.101232	0.0831618	-0.00854439	-0.162591	-0.118737	-0.123093	-0.148933	-0.00466913	-0.163804	-0.0882873	-0.0100436	-0.0313365	0	0.206714	0.132761	-0.0275697	-0.0679556	0.124809	-0.175409	0.0305808	-0.125848	0.1776	0.0064148	0.189635	0.165952	-0.0394909	0.0510585	0.0981353	0.38961	0.126102
RECN	' 87'	-0.0900473	0.0568512	0.301306	-0.289171	0.065957	0.20278	-0.0121114	0.161849	0.0427989	0.0808002	-0.066818	0.349375	0.352015	-0.247147	0.362171	0.238764	-0.156203	0.368483	0.096974	0.247232	0.374597	-0.290612	0.184479	0.174458	-0.15676	-0.166926	-0.211306	0.171999	-0.205336	0.611999	0.206714	0	0.103597	0.120936	0.196392	0.526996	-0.308719	0.132999	0.262688	0.71326	0.0103479	0.0514094	-0.111273	0.252039	0.512877	0.130317	0.298755	0.693955
	' 30'	0.0799774	-0.194569	-0.0394073	0.0182774	-0.0742925	0.110962	0.213687	0.0641023	-0.0454687	-0.365395	-0.269427	-0.134013	0.111258	-0.00100439	-0.142398	-0.228408	-0.191885	-0.0677285	0.0846822	-0.139525	0.0962646	-0.32428	-0.352209	-0.391006	0.318322	-0.258638	-0.0944779	0.133464	-0.311778	0.148893	0.132761	0.103597	0	-0.155788	0.0255867	0.209049	-0.15421	-0.279421	-0.248395	0.0711138	-0.286591	-0.0874704	-0.347257	0.100069	0.0625929	0.101635	-0.132626	0.00602842
	' 32'	0.0111527	0.352097	0.277052	0.161286	0.419925	0.108754	-0.169659	0.0447387	0.0481016	0.348423	0.242961	0.392003	0.254228	0.315945	0.213993	0.203834	0.193245	0.54578	0.399613	0.390704	0.0999845	-0.00121838	0.31769	0.357029	-0.137597	0.116318	-0.0325165	0.269582	0.0436079	0.354597	-0.0275697	0.120936	-0.155788	0	0.518741	0.102735	0.176413	0.192151	0.291679	0.169285	0.270003	0.157183	0.14213	0.00950742	0.0030861	-0.0767969	0.0937582	0.160474
	' 37'	0.13312	0.224144	0.0811245	-0.0333218	0.546769	0.109507	0.0694594	0.0885359	-0.0556254	0.266069	0.108173	0.259205	0.459533	0.270036	0.120998	0.421362	-0.153251	0.58011	0.863967	0.446824	0.0917802	-0.300986	0.227935	0.0966324	-0.164453	0.0561032	0.226418	0.150181	-0.255542	0.241644	-0.0679556	0.196392	0.0255867	0.518741	0	0.280729	0.354208	0.15966	0.259332	0.0896296	-0.0334413	-0.0451085	-0.161382	-0.0269061	0.0974137	0.0456048	-0.0656249	0.111165
	' 67'	0.0817992	-0.174296	0.151401	-0.375649	0.445013	0.187194	-0.0501167	0.0945222	-0.0363279	0.0779207	-0.269444	0.0427088	0.740127	-0.17637	-0.00411338	0.175664	-0.162897	0.0246244	0.363214	0.198266	0.492385	-0.0770083	0.316204	-0.0105046	0.0158357	-0.115793	-0.450281	0.0747635	-0.184504	0.515579	0.124809	0.526996	0.209049	0.102735	0.280729	0	-0.1676	0.183405	0.232919	0.780135	0.0219231	0.012355	-0.277176	0.391126	0.692182	0.0241953	0.348218	0.639024
VDMN	' 88'	0.0668079	0.413603	-0.0107696	-0.0285263	0.390308	0.0483876	-0.140369	-0.0091414	-0.161756	0.132389	0.317775	-0.0248663	0.0256586	0.366431	-0.135621	0.0923882	-0.00193267	0.151006	0.58997	0.267046	-0.000629549	0.104323	0.165807	0.137163	-0.1918	0.270796	0.385274	0.0536504	0.0620529	-0.123576	-0.175409	-0.308719	-0.15421	0.176413	0.354208	-0.1676	0	0.170139	0.186891	-0.328922	0.155549	0.106982	0.0703164	-0.0430242	-0.245455	-0.0182051	-0.20279	-0.166213
	' 17'	-0.147479	0.043893	-0.014777	-0.228424	0.287238	-0.0271372	-0.342469	-0.0742544	-0.172039	0.395769	-0.031613	0.057887	0.198533	-0.263014	0.137026	0.200812	0.0151534	0.205191	0.167696	0.658547	0.155547	0.353185	0.492608	0.503621	-0.314085	0.351727	-0.00984357	-0.0604184	0.380962	0.077394	0.0305808	0.132999	-0.279421	0.192151	0.15966	0.183405	0.170139	0	0.38352	0.304536	0.438139	0.283447	0.602411	-0.053962	0.114484	-0.334316	0.187119	0.313559
	' 53'	-0.0574636	0.34624	0.38317	-0.265284	0.494821	0.209444	-0.450712	0.1755	-0.0652086	0.37124	-0.0206956	0.232955	0.147701	0.121922	0.193805	0.204885	-0.0847021	0.297033	0.337715	0.68975	0.5482	0.242341	0.621823	0.503767	-0.201979	0.0990295	-0.141279	0.23856	0.0969721	0.250557	-0.125848	0.262688	-0.248395	0.291679	0.259332	0.232919	0.186891	0.38352	0	0.509496	0.305834	0.260642	0.205906	0.170387	0.0936461	-0.000163997	0.379522	0.42225
	' 58'	0.0322043	0.152612	0.448861	-0.301083	0.479896	0.240494	-0.34105	0.3106	-0.0152304	0.240033	-0.184807	0.00533453	0.457433	-0.178733	0.138409	0.36133	-0.205099	-0.061194	0.181759	0.312631	0.836516	-0.00538964	0.398363	0.214969	-0.0255624	-0.0727012	-0.488522	0.166518	-0.0537731	0.471745	0.1776	0.71326	0.0711138	0.169285	0.0896296	0.780135	-0.328922	0.304536	0.509496	0	0.115541	0.0929511	-0.0797895	0.507364	0.595541	0.0361084	0.573611	0.975397
	' 65'	-0.121994	0.213562	0.105818	-0.00386407	0.14087	0.00897528	-0.297378	-0.102265	0.257498	0.561855	0.271392	0.234755	0.0487158	-0.100282	0.276743	0.106875	0.31591	0.217577	-0.00836693	0.272962	0.072334	0.708723	0.440204	0.3121	-0.274305	0.405229	-0.0608518	0.117794	0.673165	0.0618502	0.0064148	0.0103479	-0.286591	0.270003	-0.0334413	0.0219231	0.155549	0.438139	0.305834	0.115541	0	0.915113	0.400906	-0.040744	0.0836542	-0.0431198	0.606048	0.217988
	' 71'	-0.129765	0.0142269	0.0177003	-0.010955	0.0784906	0.0863956	-0.212838	-0.1267	0.275933	0.351717	0.202817	0.0916907	-0.0816608	-0.189766	0.0348711	0.0157613	0.294011	0.200414	-0.0871939	0.355895	0.0406247	0.547593	0.297359	0.184005	-0.345665	0.324151	-0.0388814	0.0190092	0.624811	-0.0212289	0.189635	0.0514094	-0.0874704	0.157183	-0.0451085	0.012355	0.106982	0.283447	0.260642	0.0929511	0.915113	0	0.316667	-0.0554504	0.00949076	-0.076994	0.620877	0.203153
DDMN	' 76'	-0.162135	0.074874	0.0437927	0.0314353	-0.0187521	-0.0901803	-0.27419	-0.129099	-0.0369731	0.294657	0.147047	0.123222	-0.146133	-0.207868	0.125626	0.190646	0.144367	0.0401927	-0.202817	0.21215	-0.0528264	0.503052	0.304489	0.418659	-0.318006	0.286875	-0.0289878	-0.035549	0.541468	-0.169117	0.165952	-0.111273	-0.347257	0.14213	-0.161382	-0.277176	0.0703164	0.602411	0.205906	-0.0797895	0.400906	0.316667	0	-0.190867	-0.0269598	-0.15143	0.2195	-0.0372374
	' 20'	0.248778	0.368093	0.649585	-0.187982	0.309253	0.295138	-0.0416782	0.23499	0.142859	0.0370588	-0.0647357	0.0480653	0.273278	0.249893	-0.173339	-0.0647488	-0.151119	-0.260534	0.102155	-0.197086	0.506885	-0.100372	0.190045	-0.0183341	0.0407881	-0.220993	-0.207002	0.148893	-0.133113	0.236087	-0.0394909	0.252039	0.100069	0.00950742	-0.0269061	0.391126	-0.0430242	-0.053962	0.170387	0.507364	-0.040744	-0.0554504	-0.190867	0	0.748545	0.106665	0.12771	0.627748
	' 22'	0.200592	0.119715	0.36311	-0.157385	0.326711	0.21588	-0.0127175	0.0998201	0.101053	0.117155	-0.136423	0.23531	0.692481	-0.10737	0.164222	0.214447	-0.127708	-0.0390156	0.0545566	-0.152913	0.455984	-0.0241901	0.258961	0.133186	0.0457718	-0.0728434	-0.298343	0.0683349	-0.0776191	0.419282	0.0510585	0.512877	0.0625929	0.0030861	0.0974137	0.692182	-0.245455	0.114484	0.0936461	0.595541	0.0836542	0.00949076	-0.0269598	0.748545	0	-0.0123309	0.144873	0.803735
	' 31'	-0.0118838	0.0549016	-0.00946276	0.0167848	-0.106277	0.0405075	0.178477	0.182347	0.181978	0.0327034	-0.00137035	0.000408393	-0.0947718	0.203264	0.117599	0.0568988	-0.121473	-0.0994683	0.0189882	-0.251216	0.036203	-0.242408	-0.166011	-0.25189	0.101202	-0.133487	-0.0318616	0.493062	-0.177959	-0.0674207	0.0981353	0.130317	0.101635	-0.0767969	0.0456048	0.0241953	-0.0182051	-0.334316	-0.000163997	0.0361084	-0.0431198	-0.076994	-0.15143	0.106665	-0.0123309	0	0.126627	-0.0148161
	' 42'	-0.253767	-0.0951329	-0.0491084	-0.241071	0.00122564	-0.000233361	-0.268257	0.120501	0.187571	0.303389	-0.0136658	-0.0390215	-0.0317458	-0.318067	0.109039	0.0902657	0.16864	0.0134691	-0.174687	0.235132	0.314371	0.386231	0.304563	0.109417	-0.296499	0.155142	-0.423247	0.0651344	0.358498	0.0853455	0.38961	0.298755	-0.132626	0.0937582	-0.0656249	0.348218	-0.20279	0.187119	0.379522	0.573611	0.606048	0.620877	0.2195	0.12771	0.144873	0.126627	0	0.490707
	' 72'	-0.0228302	0.289134	0.451472	-0.265359	0.31389	0.301615	-0.250856	0.304589	-0.071367	0.287671	-0.120872	0.147574	0.433846	-0.165745	0.115001	0.247802	-0.224127	0.0444821	0.157046	0.246835	0.722137	-0.0529522	0.444917	0.297237	-0.0976254	-0.0921812	-0.29663	0.21071	0.0261723	0.564454	0.126102	0.693955	0.00602842	0.160474	0.111165	0.639024	-0.166213	0.313559	0.42225	0.975397	0.217988	0.203153	-0.0372374	0.627748	0.803735	-0.0148161	0.490707	0
	' 73'	-0.00575715	0.100082	0.436677	-0.131679	0.330806	0.2753	0.137472	0.173049	-0.0120738	-0.0544495	-0.105257	0.347079	0.540934	0.227682	0.165651	-0.0931506	-0.253694	0.458862	0.484522	0.174047	0.347888	-0.5	0.0788966	0.0846049	0.0826216	-0.200542	-0.175019	0.171147	-0.376322	0.828643	0.00492598	0.453523	0.293552	0.376354	0.499984	0.474122	-0.0377249	-0.204841	0.221958	0.34435	-0.160696	-0.131657	-0.284339	0.187753	0.31469	0.13216	0.0363442	0.267558
	' 80'	0.199935	0.238152	0.181024	-0.154324	0.300276	0.0741442	-0.286627	0.0399254	0.136987	0.267085	0.133691	-0.00693772	0.00765432	0.0545009	0.0601157	0.396849	0.0309195	-0.126406	0.134733	0.200519	0.555617	0.114882	0.182849	-0.056145	-0.16316	0.060542	-0.0276388	-0.0729353	0.120964	0.0882272	0.325712	0.26657	-0.165753	0.089085	0.0365271	0.275769	0.0796476	0.205569	0.506849	0.616832	0.231085	0.335299	0.129313	0.323242	0.115301	-0.00566232	0.467244	0.351958
	'100'	0.20181	0.16429	0.324927	-0.242681	0.277661	0.157706	-0.0874852	0.194117	0.0165436	0.224699	-0.0332853	0.292841	0.694601	0.0596918	0.121593	0.0612903	-0.145903	0.0847985	0.169008	-0.00170702	0.230354	0.0706333	0.448608	0.280609	0.0727696	-0.131717	-0.249924	0.139854	-0.0385664	0.410072	-0.24889	0.255301	0.00112794	0.24715	0.248352	0.500746	0.0791646	0.189698	0.125911	0.336465	0.0857662	0.0553191	-0.0368502	0.521398	0.720076	-0.0965	-0.0876817	0.511525
neam of ICN		PSN	ASN				BGN			AUN			LGN					VSN				PCN		HVN		SMN				PVN	LECN			RECN					VDMN						DDMN
name of IC		' 68'	' 26'	' 64'	' 66'	' 91'	' 7'	' 23'	' 29'	' 25'	' 44'	' 86'	' 21'	' 34'	' 35'	' 46'	' 57'	' 5'	' 33'	' 49'	' 70'	' 43'	' 82'	' 40'	' 60'	' 12'	' 14'	' 50'	' 51'	' 78'	' 59'	' 79'	' 87'	' 30'	' 32'	' 37'	' 67'	' 88'	' 17'	' 53'	' 58'	' 65'	' 71'	' 76'	' 20'	' 22'	' 31'	' 42'	' 72'
[truncated: 3 more columns]
