# Supplementary material for: No Alteration Between Intrinsic Connectivity Networks by a Pilot Study on Localized Exposure to the Fourth-Generation Wireless Communication Signals
Source: Front Public Health. 2022 Jan 13;9:734370. doi: 10.3389/fpubh.2021.734370 (PMC8793026; doi:10.3389/fpubh.2021.734370)
Supplement: Supplementary file 2 [file Table_2.XLSX]

## Sheet: IC information
Name	Label		Max correlation w.r.t template
aic_agg__component_ica_.nii,26	Anterior Insula / Dorsal ACC (Anterior Salience Network)		0.3661
aic_agg__component_ica_.nii,91	Anterior Insula / Dorsal ACC (Anterior Salience Network)		0.346
aic_agg__component_ica_.nii,66	Anterior Insula / Dorsal ACC (Anterior Salience Network)		0.2918
aic_agg__component_ica_.nii,64	Anterior Insula / Dorsal ACC (Anterior Salience Network)		0.2572
aic_agg__component_ica_.nii,25	Auditory Network		0.4577
aic_agg__component_ica_.nii,86	Auditory Network		0.3149
aic_agg__component_ica_.nii,44	Auditory Network		0.3017
aic_agg__component_ica_.nii,29	Basal Ganglia Network		0.3725
aic_agg__component_ica_.nii,23	Basal Ganglia Network		0.2866
aic_agg__component_ica_.nii,7	Basal Ganglia Network		0.217
aic_agg__component_ica_.nii,40	Higher Visual Network		0.5161
aic_agg__component_ica_.nii,60	Higher Visual Network		0.3833
aic_agg__component_ica_.nii,49	Intraparietal Sulcus / Frontal Eye Fields (Visuospatial Network)		0.3634
aic_agg__component_ica_.nii,33	Intraparietal Sulcus / Frontal Eye Fields (Visuospatial Network)		0.2685
aic_agg__component_ica_.nii,5	Intraparietal Sulcus / Frontal Eye Fields (Visuospatial Network)		0.2561
aic_agg__component_ica_.nii,70	Intraparietal Sulcus / Frontal Eye Fields (Visuospatial Network)		0.2532
aic_agg__component_ica_.nii,57	Language Network		0.3164
aic_agg__component_ica_.nii,46	Language Network		0.2984
aic_agg__component_ica_.nii,21	Language Network		0.2981
aic_agg__component_ica_.nii,34	Language Network		0.2715
aic_agg__component_ica_.nii,35	Language Network		0.2455
aic_agg__component_ica_.nii,79	Left DLPFC / Parietal (Left Executive Control Network)		0.3796
aic_agg__component_ica_.nii,87	Left DLPFC / Parietal (Left Executive Control Network)		0.3134
aic_agg__component_ica_.nii,59	Left DLPFC / Parietal (Left Executive Control Network)		0.2305
aic_agg__component_ica_.nii,20	PCC / MPFC (Dorsal Default Mode Network)		0.4834
aic_agg__component_ica_.nii,22	PCC / MPFC (Dorsal Default Mode Network)		0.4571
aic_agg__component_ica_.nii,72	PCC / MPFC (Dorsal Default Mode Network)		0.3554
aic_agg__component_ica_.nii,42	PCC / MPFC (Dorsal Default Mode Network)		0.2977
aic_agg__component_ica_.nii,31	PCC / MPFC (Dorsal Default Mode Network)		0.2711
aic_agg__component_ica_.nii,73	PCC / MPFC (Dorsal Default Mode Network)		0.2589
aic_agg__component_ica_.nii,80	PCC / MPFC (Dorsal Default Mode Network)		0.2181
aic_agg__component_ica_.nii,100	PCC / MPFC (Dorsal Default Mode Network)		0.2113
aic_agg__component_ica_.nii,68	Posterior Insula (Posterior Salience Network)		0.2772
aic_agg__component_ica_.nii,82	Precuneus Network		0.5664
aic_agg__component_ica_.nii,43	Precuneus Network		0.2058
aic_agg__component_ica_.nii,78	Primary Visual Network		0.3918
aic_agg__component_ica_.nii,53	Retrosplenial Cortex / Medial Temporal Lobe (Ventral Default Mode Network)		0.4766
aic_agg__component_ica_.nii,58	Retrosplenial Cortex / Medial Temporal Lobe (Ventral Default Mode Network)		0.3656
aic_agg__component_ica_.nii,76	Retrosplenial Cortex / Medial Temporal Lobe (Ventral Default Mode Network)		0.2789
aic_agg__component_ica_.nii,71	Retrosplenial Cortex / Medial Temporal Lobe (Ventral Default Mode Network)		0.2497
aic_agg__component_ica_.nii,65	Retrosplenial Cortex / Medial Temporal Lobe (Ventral Default Mode Network)		0.2376
aic_agg__component_ica_.nii,17	Retrosplenial Cortex / Medial Temporal Lobe (Ventral Default Mode Network)		0.2223
aic_agg__component_ica_.nii,67	Right DLPFC / Parietal (Right Executive Control Network)		0.4584
aic_agg__component_ica_.nii,30	Right DLPFC / Parietal (Right Executive Control Network)		0.3947
aic_agg__component_ica_.nii,32	Right DLPFC / Parietal (Right Executive Control Network)		0.3451
aic_agg__component_ica_.nii,88	Right DLPFC / Parietal (Right Executive Control Network)		0.3339
aic_agg__component_ica_.nii,37	Right DLPFC / Parietal (Right Executive Control Network)		0.2724
aic_agg__component_ica_.nii,51	Sensorimotor Network		0.4778
aic_agg__component_ica_.nii,14	Sensorimotor Network		0.4453
aic_agg__component_ica_.nii,12	Sensorimotor Network		0.28
aic_agg__component_ica_.nii,50	Sensorimotor Network		0.2629

## Sheet: real-pre-State1
name of IC	name of ICN	correlations
26	ASN	0	0.320413	-0.013428	0.536548	0.0393093	0.553791	0.25455	0.260837	0.0281047	0.110036	-0.143062	0.105531	0.156352	0.200443	0.0594006	0.0781926	0.329994	0.159425	0.190757	0.11356	0.184998	-0.157481	0.180714	-0.0954214	0.243612	0.283588	0.134165	-0.118516	-0.00819255	-0.00453884	0.0846454	0.195565	-0.0637886	0.0916883	0.213679	0.247902	0.234885	0.255398	0.11956	0.13984	0.249875	0.0689789	0.11573	0.163523	0.291931	-0.0692138	0.422726	-0.109757
91	ASN	0.320413	0	0.474986	0.506444	-0.258964	0.28163	0.114022	0.20373	-0.045225	0.1107	-0.153819	0.187938	0.22854	0.334298	0.0122714	0.472587	0.201069	0.0972626	0.755254	0.652082	0.0281339	0.123139	-0.148669	0.155299	0.360583	0.0674491	0.379093	-0.369903	0.184334	0.0728041	0.565283	-0.377868	0.576395	-0.338695	-0.0620897	-0.263479	0.110138	0.559642	0.0851476	-0.413559	0.291021	0.128373	-0.0554036	0.435624	0.670555	-0.166841	0.399395	-0.0514809
66	ASN	-0.013428	0.474986	0	-0.0982963	-0.185683	-0.142038	0.0678301	0.0267158	-0.00266708	0.056173	0.0421983	0.132246	1.05688	0.373837	-0.106995	-0.0445178	-0.137325	0.404842	0.27694	0.203432	-0.109033	0.0298205	-0.163263	-0.119956	-0.736385	-0.136061	-0.115008	-0.297919	-0.0347854	0.287537	0.0242391	-0.490017	0.360705	-0.100335	-0.806845	-0.212072	-0.0491344	-0.167437	-0.457317	-0.278029	-0.461988	-0.33243	-0.155678	0.963496	0.559618	-0.330569	0.0460503	-0.258317
64	ASN	0.536548	0.506444	-0.0982963	0	-0.174079	0.467804	0.103497	0.185998	0.170922	-0.0395855	-0.238111	-0.24756	-0.0142489	0.374327	1.12145	0.120127	0.304785	0.373254	0.415025	-0.0896984	0.507	0.264171	0.559902	-0.102654	0.463085	0.219022	0.096315	-0.388039	-0.104339	0.424692	0.0700211	0.0553076	0.337427	0.377557	0.296925	0.0754805	0.470866	0.583144	0.285957	0.161294	0.125328	0.517944	0.267278	0.653188	0.756578	0.542616	0.980847	-0.285837
25	AUN	0.0393093	-0.258964	-0.185683	-0.174079	0	0.965408	0.550736	0.0514021	-0.0417907	-0.231024	0.464964	0.332456	0.778865	-0.0973363	-0.0364516	-0.461228	0.172766	0.45524	0.0222306	-0.202962	-0.100074	-0.225374	-0.109535	-0.546138	0.332735	0.208133	-0.0026161	0.00702951	0.129295	-0.355613	-0.674807	0.114071	0.0518049	0.492683	-0.315216	0.0886769	-0.509952	-0.399025	-0.121579	0.353598	-0.0497355	-0.00839041	-0.0882504	-0.258189	-0.303232	-0.36422	-0.34292	0.109331
86	AUN	0.553791	0.28163	-0.142038	0.467804	0.965408	0	0.967272	0.251675	-0.277	0.124601	0.291499	0.603956	0.64532	0.0613906	-0.00764255	-0.150865	0.77937	0.872475	0.274058	0.34653	0.406478	-0.117814	0.0892282	-0.41719	0.315232	0.332203	0.467602	-0.301264	-0.114223	-0.40922	-0.465578	0.592244	-0.314471	0.306198	0.344617	0.593257	-0.147878	0.240921	0.277835	0.610258	0.509076	0.0534496	0.303834	-0.0554356	0.163992	-0.157796	-0.0468982	-0.116237
44	AUN	0.25455	0.114022	0.0678301	0.103497	0.550736	0.967272	0	-0.0447924	-0.539215	0.582557	0.263587	0.658576	0.525089	-0.511291	-0.116741	0.206563	0.0492423	0.634227	0.158264	0.0252918	0.347701	-0.405665	-0.817517	-1.054	0.0650105	-0.684928	0.114803	-0.369708	-0.224083	-1.30885	0.0346591	-0.132021	0.35154	0.4874	-0.230451	0.117324	0.116207	-0.48865	-0.051738	0.0610869	0.0683987	-0.684503	-0.199711	-0.179555	0.329411	-0.577398	0.272509	-0.0430767
29	AGN	0.260837	0.20373	0.0267158	0.185998	0.0514021	0.251675	-0.0447924	0	0.220563	0.352199	-0.600763	-0.196036	-0.164399	0.0222134	-0.1734	-0.283072	0.305197	0.00787514	0.287035	0.0525104	0.218943	-0.165365	0.0414416	0.116782	0.578078	0.331943	0.467312	-0.365417	0.0946654	0.0256861	0.0874605	0.45987	-0.218373	-0.185831	0.121165	0.138383	0.0554161	0.614111	0.384133	0.171356	0.0765379	0.0836878	0.0981482	0.208088	0.0354478	-0.00635655	0.330762	0.0558604
23	AGN	0.0281047	-0.045225	-0.00266708	0.170922	-0.0417907	-0.277	-0.539215	0.220563	0	-0.121786	-0.368777	-0.712549	-0.347585	0.104687	0.122568	-0.38051	0.160827	-0.563278	0.15354	-0.267695	0.131032	-0.0741861	0.238155	0.187693	0.360639	0.30651	-0.179213	0.11498	-0.161362	0.472441	-0.000499805	-0.118531	-0.288769	-0.364751	-0.205042	-0.218108	-0.0660377	0.108625	-0.254729	-0.324604	-0.230525	0.197775	-0.270555	0.171757	0.137551	0.151789	0.371159	0.0482307
7	AGN	0.110036	0.1107	0.056173	-0.0395855	-0.231024	0.124601	0.582557	0.352199	-0.121786	0	-0.287485	0.243424	-0.139913	-0.30222	-0.349161	-0.128781	-0.251558	0.344106	-0.308872	-0.0343865	0.0501481	-0.172411	-0.372363	-0.304749	-0.173821	-0.48308	0.610078	0.0884805	0.378206	-0.342694	0.0302265	0.0436708	0.365971	0.187312	0.0132675	-0.177028	-0.124689	-0.0175619	0.0838132	0.0306645	-0.296615	-0.570991	-0.108718	0.271354	0.00890914	-0.00491905	0.0955873	0.243011
40	HVN	-0.143062	-0.153819	0.0421983	-0.238111	0.464964	0.291499	0.263587	-0.600763	-0.368777	-0.287485	0	1.29424	0.498524	-0.328006	-0.312528	0.0699742	-0.139864	0.239561	-0.273598	0.00867166	-0.260335	-0.189691	-0.451168	-0.803687	0.0453102	0.0863713	-0.256194	0.133496	0.120468	-0.47058	-0.379331	0.171396	-0.205014	0.0424241	-0.487715	0.0488527	-0.303315	-0.748969	-0.35886	-0.130421	-0.184283	0.0351788	-0.552531	-0.443427	-0.0574238	-0.390352	-0.462733	-0.195109
60	HVN	0.105531	0.187938	0.132246	-0.24756	0.332456	0.603956	0.658576	-0.196036	-0.712549	0.243424	1.29424	0	0.402738	-0.141528	-0.318221	-0.00479461	0.308728	0.783237	-0.375724	0.313985	0.2074	-0.220053	-0.238028	-0.328029	-0.1051	0.412275	0.289864	0.222795	0.389509	-0.35748	-0.250727	0.330903	-0.0138133	0.325469	-0.166321	0.48907	0.0246326	-0.43492	0.174451	0.520732	0.356206	0.183307	0.0128504	-0.219551	-0.267892	-0.43623	-0.370354	-0.257102
49	VSN	0.156352	0.22854	0.999	-0.0142489	0.778865	0.64532	0.525089	-0.164399	-0.347585	-0.139913	0.498524	0.402738	0	0.390339	0.313667	-0.127686	0.101888	0.331474	-0.105115	-0.0348385	-0.555057	0.178555	-0.0125126	-0.400825	-0.469624	0.0976089	0.108844	-0.51862	0.0433344	0.122933	-0.50454	-0.169918	-0.00665141	0.152586	-0.537246	0.0916749	-0.304453	-0.437869	-0.455634	0.427808	-0.268434	-0.155447	0.312718	0.569496	0.518333	-0.476224	0.0863083	-0.0965835
33	VSN	0.200443	0.334298	0.373837	0.374327	-0.0973363	0.0613906	-0.511291	0.0222134	0.104687	-0.30222	-0.328006	-0.141528	0.390339	0	0.843972	0.451591	0.762399	0.147655	0.0750047	0.31667	-0.0732803	1.09478	0.947278	0.895904	-0.533732	0.241429	-0.030147	-0.0319566	0.0524918	1.05995	-0.0451305	0.0793729	-0.0491955	-0.0960785	0.116147	0.00437263	0.209497	0.421905	-0.224735	0.317644	0.151515	0.769282	0.196638	0.922563	0.771228	0.110847	0.459698	-0.433749
5	VSN	0.0594006	0.0122714	-0.106995	1.12145	-0.0364516	-0.00764255	-0.116741	-0.1734	0.122568	-0.349161	-0.312528	-0.318221	0.313667	0.843972	0	0.628855	0.0175938	0.206473	0.109638	-0.498733	-0.310272	1.18938	0.542295	0.238195	-0.500874	-0.339372	-0.118806	-0.350053	-0.352959	0.381724	-0.102393	-0.292429	0.294163	0.362175	0.219592	0.0527729	0.478133	0.542016	-0.0809768	0.381014	-0.16773	0.495306	0.719369	0.6975	0.656343	0.338928	0.924657	-0.17161
70	VSN	0.0781926	0.472587	-0.0445178	0.120127	-0.461228	-0.150865	0.206563	-0.283072	-0.38051	-0.128781	0.0699742	-0.00479461	-0.127686	0.451591	0.628855	0	-0.504286	-0.268367	0.107704	0.0923242	-0.472012	0.599807	-0.063503	0.191934	-0.444737	-0.710597	0.276622	-0.209433	0.108019	-0.494898	0.872422	-0.763014	0.607054	0.0507658	0.231528	-0.111087	0.73303	0.549839	0.117706	-0.576002	0.423899	0.266074	0.128617	0.060829	0.809265	-0.129149	0.613174	-0.195586
57	LGN	0.329994	0.201069	-0.137325	0.304785	0.172766	0.77937	0.0492423	0.305197	0.160827	-0.251558	-0.139864	0.308728	0.101888	0.762399	0.0175938	-0.504286	0	0.926264	0.184409	1.05141	0.794846	0.21175	0.300683	0.53619	0.471049	1.10944	0.0718978	-0.0964394	-0.0488295	0.649913	-0.244113	1.08089	-0.46142	0.0424845	0.67905	0.600163	0.0629176	0.000913783	0.470419	0.736299	0.727429	0.451284	-0.100392	0.327949	0.333247	0.305609	0.194761	-0.177127
46	LGN	0.159425	0.0972626	0.404842	0.373254	0.45524	0.872475	0.634227	0.00787514	-0.563278	0.344106	0.239561	0.783237	0.331474	0.147655	0.206473	-0.268367	0.926264	0	-0.0793251	0.895928	0.807917	0.287677	0.0734888	-0.248065	-0.0877698	0.545339	0.293765	-0.204687	0.254359	0.0363643	-0.240483	0.781489	0.348365	0.567466	0.207164	0.0505646	-0.292405	-0.491489	0.577304	0.525086	0.0618007	-0.46488	0.0285034	0.497872	0.501552	0.415999	-0.187567	-0.108071
21	LGN	0.190757	0.755254	0.27694	0.415025	0.0222306	0.274058	0.158264	0.287035	0.15354	-0.308872	-0.273598	-0.375724	-0.105115	0.0750047	0.109638	0.107704	0.184409	-0.0793251	0	0.148489	0.399229	-0.233454	-0.373685	-0.328758	0.671612	-0.353272	-0.147305	-0.150656	-0.580918	-0.139688	0.602022	-0.0987469	0.5349	-0.105068	-0.355696	-0.0241581	0.0479919	-0.165817	-0.124767	-0.519167	-0.0987403	-0.0810827	-0.386733	0.350112	0.836964	-0.0190012	0.72014	0.138003
34	LGN	0.11356	0.652082	0.203432	-0.0896984	-0.202962	0.34653	0.0252918	0.0525104	-0.267695	-0.0343865	0.00867166	0.313985	-0.0348385	0.31667	-0.498733	0.0923242	1.05141	0.895928	0.148489	0	0.744047	0.110036	-0.0303251	0.468315	0.228294	0.690205	0.243151	0.253895	0.355655	0.40073	0.479191	0.563781	-0.0157138	-0.140129	0.641029	0.0653868	0.113802	-0.165281	0.407201	0.229913	0.734951	0.0728392	-0.290526	0.336796	0.142907	0.367488	-0.314195	-0.222885
35	LGN	0.184998	0.0281339	-0.109033	0.507	-0.100074	0.406478	0.347701	0.218943	0.131032	0.0501481	-0.260335	0.2074	-0.555057	-0.0732803	-0.310272	-0.472012	0.794846	0.807917	0.399229	0.744047	0	-0.34046	0.00300912	0.263347	0.608634	0.772665	-0.121683	0.582411	0.0854735	0.368429	0.503888	0.716771	0.0746166	0.0985311	0.596222	0.137518	0.221049	-0.22456	0.874078	0.282689	0.659504	0.302655	-0.45979	0.00956686	0.150714	0.558557	0.0402213	-0.30819
79	LECN	-0.157481	0.123139	0.0298205	0.264171	-0.225374	-0.117814	-0.405665	-0.165365	-0.0741861	-0.172411	-0.189691	-0.220053	0.178555	1.09478	1.18938	0.599807	0.21175	0.287677	-0.233454	0.110036	-0.34046	0	0.462608	1.077	-0.348146	0.0134177	-0.118692	-0.340991	0.498362	0.751371	-0.0465929	-0.108062	0.247227	0.133012	0.257472	-0.0332307	-0.104897	0.140065	0.178766	0.228956	0.0988729	0.163089	0.33171	0.601853	0.0821738	0.748909	0.316299	-0.329869
87	LECN	0.180714	-0.148669	-0.163263	0.559902	-0.109535	0.0892282	-0.817517	0.0414416	0.238155	-0.372363	-0.451168	-0.238028	-0.0125126	0.947278	0.542295	-0.063503	0.300683	0.0734888	-0.373685	-0.0303251	0.00300912	0.462608	0	0.710758	-0.174919	0.437922	0.304901	0.224129	0.142277	1.09714	-0.292745	0.197013	-0.615363	-0.337927	0.693024	0.274165	0.298043	0.560212	0.20404	0.628434	0.425724	0.977958	0.61159	0.307999	-0.0736605	0.763001	0.228114	-0.263271
59	LECN	-0.0954214	0.155299	-0.119956	-0.102654	-0.546138	-0.41719	-1.054	0.116782	0.187693	-0.304749	-0.803687	-0.328029	-0.400825	0.895904	0.238195	0.191934	0.53619	-0.248065	-0.328758	0.468315	0.263347	1.077	0.710758	0	0.155478	0.813141	0.201722	0.47125	0.791527	1.41015	0.511568	0.153382	-0.281515	-0.139556	0.854751	-0.143207	0.0807726	0.627181	0.684485	0.422075	0.843778	0.751091	0.118117	0.24837	-0.247656	1.08582	-0.0900638	-0.192055
20	DDMN	0.243612	0.360583	-0.736385	0.463085	0.332735	0.315232	0.0650105	0.578078	0.360639	-0.173821	0.0453102	-0.1051	-0.469624	-0.533732	-0.500874	-0.444737	0.471049	-0.0877698	0.671612	0.228294	0.608634	-0.348146	-0.174919	0.155478	0	0.691429	-0.0907311	0.254026	0.409447	0.164929	0.34607	0.583845	-0.203035	0.173772	0.292136	-0.00157217	0.084787	-0.149423	0.450157	-0.153746	0.358834	-0.00989927	-0.728968	-0.487515	-0.00139351	0.43727	-0.0972841	-0.163628
22	DDMN	0.283588	0.0674491	-0.136061	0.219022	0.208133	0.332203	-0.684928	0.331943	0.30651	-0.48308	0.0863713	0.412275	0.0976089	0.241429	-0.339372	-0.710597	1.10944	0.545339	-0.353272	0.690205	0.772665	0.0134177	0.437922	0.813141	0.691429	0	0.12862	0.161833	0.839134	1.03558	-0.191073	1.18376	-0.768549	0.191578	0.565589	0.480154	0.0360028	0.0946667	0.618892	0.654268	0.598009	0.763775	0.0936566	-0.00276172	-0.13622	0.54667	-0.433255	-0.0980067
72	DDMN	0.134165	0.379093	-0.115008	0.096315	-0.0026161	0.467602	0.114803	0.467312	-0.179213	0.610078	-0.256194	0.289864	0.108844	-0.030147	-0.118806	0.276622	0.0718978	0.293765	-0.147305	0.243151	-0.121683	-0.118692	0.304901	0.201722	-0.0907311	0.12862	0	0.0658193	0.535211	-0.124185	0.0628677	-0.0340182	-0.110081	0.17623	0.29006	0.13044	-0.16912	0.377797	0.300524	0.510354	0.287042	0.235383	0.163614	0.274848	0.0720452	0.184849	-0.227312	0.421619
42	DDMN	-0.118516	-0.369903	-0.297919	-0.388039	0.00702951	-0.301264	-0.369708	-0.365417	0.11498	0.0884805	0.133496	0.222795	-0.51862	-0.0319566	-0.350053	-0.209433	-0.0964394	-0.204687	-0.150656	0.253895	0.582411	-0.340991	0.224129	0.47125	0.254026	0.161833	0.0658193	0	0.339507	0.191753	0.409803	0.0672343	-0.298847	0.407396	0.553609	-0.307768	0.201385	-0.1887	0.325602	0.0677211	0.866264	0.431457	-0.519802	-0.373877	-0.314649	0.424559	-0.719647	-0.248604
31	DDMN	-0.00819255	0.184334	-0.0347854	-0.104339	0.129295	-0.114223	-0.224083	0.0946654	-0.161362	0.378206	0.120468	0.389509	0.0433344	0.0524918	-0.352959	0.108019	-0.0488295	0.254359	-0.580918	0.355655	0.0854735	0.498362	0.142277	0.791527	0.409447	0.839134	0.535211	0.339507	0	0.411758	0.639681	0.191772	-0.104045	0.559538	0.50868	-0.19379	-0.218233	0.108674	0.507654	0.30851	0.61045	0.343333	-0.142455	0.0331139	-0.321208	0.456719	-0.626442	-0.263164
73	DDMN	-0.00453884	0.0728041	0.287537	0.424692	-0.355613	-0.40922	-1.30885	0.0256861	0.472441	-0.342694	-0.47058	-0.35748	0.122933	1.05995	0.381724	-0.494898	0.649913	0.0363643	-0.139688	0.40073	0.368429	0.751371	1.09714	1.41015	0.164929	1.03558	-0.124185	0.191753	0.411758	0	-0.113027	0.314267	-0.469555	-0.121663	0.341406	-0.0590435	-0.193023	0.221178	0.00776765	0.435653	0.197531	0.729596	0.0887825	0.741529	0.275974	1.02535	0.110435	-0.314747
80	DDMN	0.0846454	0.565283	0.0242391	0.0700211	-0.674807	-0.465578	0.0346591	0.0874605	-0.000499805	0.0302265	-0.379331	-0.250727	-0.50454	-0.0451305	-0.102393	0.872422	-0.244113	-0.240483	0.602022	0.479191	0.503888	-0.0465929	-0.292745	0.511568	0.34607	-0.191073	0.0628677	0.409803	0.639681	-0.113027	0	-0.430332	0.525436	0.211615	0.448513	-0.405629	0.372747	0.204782	0.624052	-0.517806	0.730948	0.408984	-0.536336	-0.134481	0.337579	0.262956	0.482093	-0.103593
100	DDMN	0.195565	-0.377868	-0.490017	0.0553076	0.114071	0.592244	-0.132021	0.45987	-0.118531	0.0436708	0.171396	0.330903	-0.169918	0.0793729	-0.292429	-0.763014	1.08089	0.781489	-0.0987469	0.563781	0.716771	-0.108062	0.197013	0.153382	0.583845	1.18376	-0.0340182	0.0672343	0.191772	0.314267	-0.430332	0	-0.636778	-0.00548545	0.682151	0.32599	-0.0287254	-0.00111445	0.574598	0.637938	0.319664	0.0450754	0.0999204	-0.0462535	-0.0358404	0.401076	-0.0728802	0.303025
68	PSN	-0.0637886	0.576395	0.360705	0.337427	0.0518049	-0.314471	0.35154	-0.218373	-0.288769	0.365971	-0.205014	-0.0138133	-0.00665141	-0.0491955	0.294163	0.607054	-0.46142	0.348365	0.5349	-0.0157138	0.0746166	0.247227	-0.615363	-0.281515	-0.203035	-0.768549	-0.110081	-0.298847	-0.104045	-0.469555	0.525436	-0.636778	0	0.284866	-0.378126	-0.39874	-0.19118	-0.247892	-0.0066451	-0.773695	-0.439988	-0.195865	-0.0845995	0.197463	0.440053	0.00843117	0.599663	0.0494209
82	PCN	0.0916883	-0.338695	-0.100335	0.377557	0.492683	0.306198	0.4874	-0.185831	-0.364751	0.187312	0.0424241	0.325469	0.152586	-0.0960785	0.362175	0.0507658	0.0424845	0.567466	-0.105068	-0.140129	0.0985311	0.133012	-0.337927	-0.139556	0.173772	0.191578	0.17623	0.407396	0.559538	-0.121663	0.211615	-0.00548545	0.284866	0	-0.00021323	-0.196982	0.088944	-0.136556	0.271202	0.268061	0.096515	-0.0262264	0.0172407	0.0425686	0.152799	0.19928	-0.0484455	-0.176014
43	PCN	0.213679	-0.0620897	-0.806845	0.296925	-0.315216	0.344617	-0.230451	0.121165	-0.205042	0.0132675	-0.487715	-0.166321	-0.537246	0.116147	0.219592	0.231528	0.67905	0.207164	-0.355696	0.641029	0.596222	0.257472	0.693024	0.854751	0.292136	0.565589	0.29006	0.553609	0.50868	0.341406	0.448513	0.682151	-0.378126	-0.00021323	0	0.44017	0.108059	0.47496	0.962296	0.761464	1.34323	0.553251	0.253281	-0.00772565	-0.293128	0.841331	0.127722	-0.0362811
78	PVN	0.247902	-0.263479	-0.212072	0.0754805	0.0886769	0.593257	0.117324	0.138383	-0.218108	-0.177028	0.0488527	0.48907	0.0916749	0.00437263	0.0527729	-0.111087	0.600163	0.0505646	-0.0241581	0.0653868	0.137518	-0.0332307	0.274165	-0.143207	-0.00157217	0.480154	0.13044	-0.307768	-0.19379	-0.0590435	-0.405629	0.32599	-0.39874	-0.196982	0.44017	0	0.253858	-0.101174	-0.0655093	0.858116	0.756808	0.702836	1.08725	0.251991	-0.639538	0.0825138	0.238379	-0.229707
53	VDMN	0.234885	0.110138	-0.0491344	0.470866	-0.509952	-0.147878	0.116207	0.0554161	-0.0660377	-0.124689	-0.303315	0.0246326	-0.304453	0.209497	0.478133	0.73303	0.0629176	-0.292405	0.0479919	0.113802	0.221049	-0.104897	0.298043	0.0807726	0.084787	0.0360028	-0.16912	0.201385	-0.218233	-0.193023	0.372747	-0.0287254	-0.19118	0.088944	0.108059	0.253858	0	0.465467	0.155524	-0.0521816	0.448171	0.480844	0.128479	-0.00564436	0.36488	-0.0913208	0.377693	-0.430512
58	VDMN	0.255398	0.559642	-0.167437	0.583144	-0.399025	0.240921	-0.48865	0.614111	0.108625	-0.0175619	-0.748969	-0.43492	-0.437869	0.421905	0.542016	0.549839	0.000913783	-0.491489	-0.165817	-0.165281	-0.22456	0.140065	0.560212	0.627181	-0.149423	0.0946667	0.377797	-0.1887	0.108674	0.221178	0.204782	-0.00111445	-0.247892	-0.136556	0.47496	-0.101174	0.465467	0	0.192864	0.153145	0.329618	0.567006	0.608674	0.103729	0.135675	-0.1607	0.29989	0.183419
76	VDMN	0.11956	0.0851476	-0.457317	0.285957	-0.121579	0.277835	-0.051738	0.384133	-0.254729	0.0838132	-0.35886	0.174451	-0.455634	-0.224735	-0.0809768	0.117706	0.470419	0.577304	-0.124767	0.407201	0.874078	0.178766	0.20404	0.684485	0.450157	0.618892	0.300524	0.325602	0.507654	0.00776765	0.624052	0.574598	-0.0066451	0.271202	0.962296	-0.0655093	0.155524	0.192864	0	0.459497	0.550526	0.0135273	0.0895464	-0.37741	-0.119051	0.690317	-0.168592	0.339815
71	VDMN	0.13984	-0.413559	-0.278029	0.161294	0.353598	0.610258	0.0610869	0.171356	-0.324604	0.0306645	-0.130421	0.520732	0.427808	0.317644	0.381014	-0.576002	0.736299	0.525086	-0.519167	0.229913	0.282689	0.228956	0.628434	0.422075	-0.153746	0.654268	0.510354	0.0677211	0.30851	0.435653	-0.517806	0.637938	-0.773695	0.268061	0.761464	0.858116	-0.0521816	0.153145	0.459497	0	0.687486	0.337641	0.901821	0.17123	-0.381875	0.295241	-0.347527	0.219244
65	VDMN	0.249875	0.291021	-0.461988	0.125328	-0.0497355	0.509076	0.0683987	0.0765379	-0.230525	-0.296615	-0.184283	0.356206	-0.268434	0.151515	-0.16773	0.423899	0.727429	0.0618007	-0.0987403	0.734951	0.659504	0.0988729	0.425724	0.843778	0.358834	0.598009	0.287042	0.866264	0.61045	0.197531	0.730948	0.319664	-0.439988	0.096515	1.34323	0.756808	0.448171	0.329618	0.550526	0.687486	0	0.975079	0.141393	-0.2217	-0.186823	0.376123	-0.0347612	-0.413738
17	VDMN	0.0689789	0.128373	-0.33243	0.517944	-0.00839041	0.0534496	-0.684503	0.0836878	0.197775	-0.570991	0.0351788	0.183307	-0.155447	0.769282	0.495306	0.266074	0.451284	-0.46488	-0.0810827	0.0728392	0.302655	0.163089	0.977958	0.751091	-0.00989927	0.763775	0.235383	0.431457	0.343333	0.729596	0.408984	0.0450754	-0.195865	-0.0262264	0.553251	0.702836	0.480844	0.567006	0.0135273	0.337641	0.975079	0	0.202268	0.196586	-0.116691	0.152849	-0.0213569	-0.314277
67	RECN	0.11573	-0.0554036	-0.155678	0.267278	-0.0882504	0.303834	-0.199711	0.0981482	-0.270555	-0.108718	-0.552531	0.0128504	0.312718	0.196638	0.719369	0.128617	-0.100392	0.0285034	-0.386733	-0.290526	-0.45979	0.33171	0.61159	0.118117	-0.728968	0.0936566	0.163614	-0.519802	-0.142455	0.0887825	-0.536336	0.0999204	-0.0845995	0.0172407	0.253281	1.08725	0.128479	0.608674	0.0895464	0.901821	0.141393	0.202268	0	0.363482	-0.411661	0.0387738	0.134707	0.383918
30	RECN	0.163523	0.435624	0.963496	0.653188	-0.258189	-0.0554356	-0.179555	0.208088	0.171757	0.271354	-0.443427	-0.219551	0.569496	0.922563	0.6975	0.060829	0.327949	0.497872	0.350112	0.336796	0.00956686	0.601853	0.307999	0.24837	-0.487515	-0.00276172	0.274848	-0.373877	0.0331139	0.741529	-0.134481	-0.0462535	0.197463	0.0425686	-0.00772565	0.251991	-0.00564436	0.103729	-0.37741	0.17123	-0.2217	0.196586	0.363482	0	0.67858	0.429056	0.533965	-0.207958
32	RECN	0.291931	0.670555	0.559618	0.756578	-0.303232	0.163992	0.329411	0.0354478	0.137551	0.00890914	-0.0574238	-0.267892	0.518333	0.771228	0.656343	0.809265	0.333247	0.501552	0.836964	0.142907	0.150714	0.0821738	-0.0736605	-0.247656	-0.00139351	-0.13622	0.0720452	-0.314649	-0.321208	0.275974	0.337579	-0.0358404	0.440053	0.152799	-0.293128	-0.639538	0.36488	0.135675	-0.119051	-0.381875	-0.186823	-0.116691	-0.411661	0.67858	0	-0.0893796	0.877517	-0.103505
88	RECN	-0.0692138	-0.166841	-0.330569	0.542616	-0.36422	-0.157796	-0.577398	-0.00635655	0.151789	-0.00491905	-0.390352	-0.43623	-0.476224	0.110847	0.338928	-0.129149	0.305609	0.415999	-0.0190012	0.367488	0.558557	0.748909	0.763001	1.08582	0.43727	0.54667	0.184849	0.424559	0.456719	1.02535	0.262956	0.401076	0.00843117	0.19928	0.841331	0.0825138	-0.0913208	-0.1607	0.690317	0.295241	0.376123	0.152849	0.0387738	0.429056	-0.0893796	0	0.334255	-0.209997
37	RECN	0.422726	0.399395	0.0460503	0.980847	-0.34292	-0.0468982	0.272509	0.330762	0.371159	0.0955873	-0.462733	-0.370354	0.0863083	0.459698	0.924657	0.613174	0.194761	-0.187567	0.72014	-0.314195	0.0402213	0.316299	0.228114	-0.0900638	-0.0972841	-0.433255	-0.227312	-0.719647	-0.626442	0.110435	0.482093	-0.0728802	0.599663	-0.0484455	0.127722	0.238379	0.377693	0.29989	-0.168592	-0.347527	-0.0347612	-0.0213569	0.134707	0.533965	0.877517	0.334255	0	0.119078
51	SMN	-0.109757	-0.0514809	-0.258317	-0.285837	0.109331	-0.116237	-0.0430767	0.0558604	0.0482307	0.243011	-0.195109	-0.257102	-0.0965835	-0.433749	-0.17161	-0.195586	-0.177127	-0.108071	0.138003	-0.222885	-0.30819	-0.329869	-0.263271	-0.192055	-0.163628	-0.0980067	0.421619	-0.248604	-0.263164	-0.314747	-0.103593	0.303025	0.0494209	-0.176014	-0.0362811	-0.229707	-0.430512	0.183419	0.339815	0.219244	-0.413738	-0.314277	0.383918	-0.207958	-0.103505	-0.209997	0.119078	0
14	SMN	0.155645	0.0363643	0.120861	-0.0784031	0.219607	0.580352	0.918673	-0.228894	-0.705693	0.362716	0.626114	0.959766	0.702801	-0.30768	-0.0671397	0.540873	-0.123851	0.672254	-0.375518	0.118033	0.0603733	-0.220628	-0.321642	-0.694187	-0.319194	-0.136493	0.188318	-0.229134	0.117061	-0.449869	-0.145043	0.0813124	-0.138212	0.241806	-0.125099	0.156301	0.189073	-0.204432	-0.0725602	0.363096	0.156922	-0.40815	0.244927	-0.251003	0.477464	-0.531573	-0.0690311	-0.0314018
12	SMN	0.0233557	-0.0988694	-0.127015	-0.112345	0.59867	0.424561	0.881832	-0.292011	-0.553142	-0.237023	0.523537	0.604771	0.374744	-0.0928291	-0.091734	0.397561	-0.00449124	0.0728533	0.407678	0.103585	0.118769	-0.37016	-0.684868	-0.581326	0.069957	-0.313545	-0.295954	-0.0538867	-0.309207	-0.569196	0.0758154	-0.0951771	0.264016	0.435887	-0.582629	0.104968	0.17336	-0.27255	-0.422426	-0.111703	0.241075	0.0432202	-0.163657	-0.618276	0.363009	-0.946048	-0.092677	-0.249352
50	SMN	0.15308	-0.0482635	0.0670211	-0.172197	0.453656	0.737468	0.446971	0.266553	-0.572101	0.150492	0.12642	0.754268	0.559611	-0.105981	-0.0129895	-0.0494535	0.157845	0.364476	-0.308257	0.174223	-0.107743	-0.155835	0.224814	-0.27816	-0.41098	0.147953	0.695203	-0.115127	0.240016	-0.282044	-0.349367	0.236249	-0.325809	0.197964	0.215453	0.975184	-0.0473506	-0.00621451	0.101645	1.18537	0.365152	0.127209	0.732521	0.255148	-0.356535	-0.341134	-0.397744	0.219507
	name of IC	26	91	66	64	25	86	44	29	23	7	40	60	49	33	5	70	57	46	21	34	35	79	87	59	20	22	72	42	31	73	80	100	68	82	43	78	53	58	76	71	65	17	67	30	32	88	37	51
	name of ICN	ASN	ASN	ASN	ASN	AUN	AUN	AUN	AGN	AGN	AGN	HVN	HVN	VSN	VSN	VSN	VSN	LGN	LGN	LGN	LGN	LGN	LECN	LECN	LECN	DDMN	DDMN	DDMN	DDMN	DDMN	DDMN	DDMN	DDMN	PSN	PCN	PCN	PVN	VDMN	VDMN	VDMN	VDMN	VDMN	VDMN	RECN	RECN	RECN	RECN	RECN	SMN
[truncated: 3 more columns]

## Sheet: real-pre-State2
name of IC	name of ICN	correlations
26	ASN	0	0.547435	0.153909	0.417342	0.0381333	0.261052	0.317849	0.287054	-0.17934	0.194799	0.200007	0.233342	0.0781461	0.0799409	0.134853	0.0861722	0.164711	0.00745767	0.369508	0.000587744	0.234888	-0.0813116	-0.101145	-0.141154	0.406713	0.134901	-0.0652603	-0.136988	0.2125	-0.00279486	0.218998	0.123708	0.174534	0.234205	0.0271242	0.00700322	0.115588	0.263251	0.058869	0.0979483	0.0856757	0.169988	-0.132228	0.267149	0.156649	-0.238217	0.342213	-0.1009
91	ASN	0.547435	0	0.166752	0.341736	-0.0281859	0.217257	0.095252	0.292196	-0.0243335	0.0792964	0.128753	0.220374	-0.0273031	0.126205	0.0657406	0.014269	0.3059	0.0935698	0.391697	0.131845	0.0987192	0.226315	-0.179527	0.0640117	0.546156	0.173307	-0.11035	-0.156872	0.203416	0.267846	0.203129	0.0876263	0.213682	0.229232	-0.015761	0.0257805	0.0397798	0.259753	0.19611	0.0520611	0.0434611	0.178854	-0.0952301	0.303513	0.125513	-0.0904217	0.146679	-0.10445
66	ASN	0.153909	0.166752	0	-0.157846	-0.00646597	0.0290483	0.0924362	-0.0833722	0.0115829	-0.0586531	-0.0851289	-0.129185	0.324692	0.0092051	-0.260497	-0.212014	0.0339416	-0.120373	0.135202	-0.0241705	-0.0494781	-0.257902	-0.101125	-0.244372	-0.134594	-0.0530252	0.11853	-0.214866	-0.113315	0.0039259	-0.153712	-0.146841	0.00254779	-0.287108	0.0388887	-0.0510446	-0.227875	-0.158364	-0.26893	-0.0171429	-0.065785	-0.0313886	0.0227754	0.115258	-0.0129616	-0.268406	-0.0318341	0.0823259
64	ASN	0.417342	0.341736	-0.157846	0	-0.0899504	0.175352	0.0299055	0.153434	-0.202154	0.0880999	0.327637	0.176664	-0.273862	0.0034858	0.70409	0.427924	-0.153847	0.188971	0.233559	-0.0522465	0.428311	0.0901168	-0.0533813	-0.0759027	0.25863	0.153508	-0.108785	-0.0113371	0.224453	0.195647	0.25725	0.0480977	0.266304	0.476116	-0.0660582	-0.125349	0.33843	0.400135	0.355041	-0.0347901	0.0078656	0.0395911	-0.0959877	0.230854	0.431792	0.262747	0.405129	-0.111892
25	AUN	0.0381333	-0.0281859	-0.00646597	-0.0899504	0	0.407997	0.417668	-0.0727159	0.107602	-0.165387	-0.107939	-0.203561	0.304814	0.119374	-0.0312231	-0.234395	0.135797	0.0317458	0.265835	0.134449	0.139993	-0.0748401	0.120504	0.0458636	0.136561	0.0819919	0.123715	0.258585	0.0433854	-0.0536664	0.122732	-0.0760153	0.0712282	-0.00208977	0.0866614	0.0833313	-0.0970254	0.00124814	0.00428832	0.248711	0.216126	0.00769284	0.00436728	0.0715208	0.030679	-0.0149997	-0.00314996	-0.129516
86	AUN	0.261052	0.217257	0.0290483	0.175352	0.407997	0	0.337228	0.0707858	-0.127236	-0.0936674	0.294648	0.196258	0.204462	0.166796	0.0184761	-0.012564	0.369699	0.259647	0.198859	0.369219	0.411259	0.0671694	0.1083	0.0575343	0.148269	0.200879	0.109232	0.245113	0.189064	-0.0546654	0.181602	0.215827	0.144481	0.0985313	0.176197	0.208774	0.200716	0.201384	0.195687	0.339444	0.254377	0.170773	-0.165928	0.244106	0.206252	0.0139286	0.102472	-0.21131
44	AUN	0.317849	0.095252	0.0924362	0.0299055	0.417668	0.337228	0	-0.0481838	-0.0504549	-0.0447046	0.122246	-0.00702778	0.377398	0.0534511	-0.0948782	-0.0968445	0.171035	-0.0538445	0.24093	0.104109	0.253772	-0.121899	0.0668505	-0.100055	0.0506908	-0.104305	0.0483411	0.00836064	-0.0649556	-0.146601	0.121204	-0.0386315	0.0893004	-0.0627157	0.0419509	0.116599	-0.0276332	-0.0559714	-0.145204	0.114317	0.0935067	0.0820722	-0.1635	0.171013	0.126819	-0.279667	0.271662	-0.143336
29	AGN	0.287054	0.292196	-0.0833722	0.153434	-0.0727159	0.0707858	-0.0481838	0	0.150691	0.310652	0.0719317	0.080501	-0.199713	-0.00182363	0.0692433	-0.0167561	0.0727941	0.055508	0.01167	-0.0195045	0.0238432	0.107968	-0.121584	0.0287321	0.292448	0.211525	-0.0371947	0.00948022	0.17873	0.176147	-0.0208193	0.0882861	-0.0624585	0.214749	0.00910477	-0.00971459	-0.00290793	0.139389	0.111305	0.00312258	0.0320686	-0.015812	-0.0193869	0.0911292	0.068168	0.0488277	0.101619	-0.03137
23	AGN	-0.17934	-0.0243335	0.0115829	-0.202154	0.107602	-0.127236	-0.0504549	0.150691	0	-0.0971602	-0.148591	-0.228089	0.0503635	0.115455	-0.0151805	-0.243201	0.0448565	0.0856547	0.0783826	0.0927926	-0.105619	0.0817457	0.0111489	0.0284795	0.069347	0.0319438	0.0577888	-0.184297	-0.0984613	0.130841	-0.194968	-0.0405812	-0.00316127	-0.191849	-0.247196	-0.0987737	-0.318441	-0.268154	-0.278925	-0.0925771	-0.0584376	-0.293089	0.0639333	-0.0492083	0.129273	0.0189667	0.00252702	-0.0295616
7	AGN	0.194799	0.0792964	-0.0586531	0.0880999	-0.165387	-0.0936674	-0.0447046	0.310652	-0.0971602	0	0.143396	0.243366	-0.313479	-0.124438	0.0835935	0.0250038	0.0284045	-0.0577328	-0.0522463	-0.109101	-0.0792818	0.111231	-0.273153	-0.00885793	0.12765	-0.0189647	0.0308688	-0.0565412	0.21185	-0.0262137	-0.0313231	0.156517	-0.041572	0.217939	-0.0658913	-0.136306	0.0296495	0.119331	0.132926	-0.0942797	-0.0952428	-0.0795501	-0.062459	-0.02668	-0.0379756	0.0292672	0.00791314	0.110884
40	HVN	0.200007	0.128753	-0.0851289	0.327637	-0.107939	0.294648	0.122246	0.0719317	-0.148591	0.143396	0	0.697914	0.0861659	0.0821556	0.129038	0.319871	0.140141	0.180023	-0.112694	0.0383244	0.132194	0.0911646	-0.0125532	0.0370476	0.0789867	0.149719	-0.0445666	0.141138	0.300406	-0.0859375	0.170984	0.270421	-0.037318	0.200367	0.170023	0.353389	0.374135	0.303438	0.235029	0.280084	0.269322	0.333748	-0.218372	0.205357	0.150714	0.115398	0.0680881	-0.235918
60	HVN	0.233342	0.220374	-0.129185	0.176664	-0.203561	0.196258	-0.00702778	0.080501	-0.228089	0.243366	0.697914	0	-0.0861206	0.25425	0.188446	0.321299	0.199841	0.17536	-0.105716	0.0455009	0.0488482	0.272151	-0.00606671	0.115611	0.0361457	0.190649	-0.22301	0.0298315	0.327759	0.00206111	0.0549635	0.285581	-0.101238	0.140929	-0.0233857	0.347493	0.510041	0.288207	0.153511	0.236737	0.163199	0.466134	-0.31668	0.223309	0.0615288	-0.00534503	0.00712015	-0.201915
49	VSN	0.0781461	-0.0273031	0.324692	-0.273862	0.304814	0.204462	0.377398	-0.199713	0.0503635	-0.313479	0.0861659	-0.0861206	0	0.117752	-0.241863	-0.139968	0.13385	-0.0773859	0.00556212	0.0229068	-0.0488914	-0.124218	0.132769	-0.0878559	-0.0495351	-0.0452206	-0.0497313	0.060058	-0.109695	-0.139176	-0.0685359	-0.0716882	-0.03971	-0.204738	0.154958	0.131892	-0.120974	-0.169784	-0.235991	0.173055	0.131611	0.0271963	-0.0708815	0.181583	0.00336204	-0.181576	-0.014715	-0.163316
33	VSN	0.0799409	0.126205	0.0092051	0.0034858	0.119374	0.166796	0.0534511	-0.00182363	0.115455	-0.124438	0.0821556	0.25425	0.117752	0	0.373394	0.336388	0.346306	0.269569	0.0629772	0.275056	0.0637414	0.482096	0.0737183	0.303519	-0.271972	-0.0760145	-0.0948	0.0162534	0.0745608	0.391701	-0.00450488	0.0168767	-0.143359	0.00985084	-0.25322	0.0498511	0.103088	0.222472	-0.0782952	0.123428	0.0985935	0.105266	0.00316767	0.447929	0.492119	0.00910639	0.156176	-0.229963
5	VSN	0.134853	0.0657406	-0.260497	0.70409	-0.0312231	0.0184761	-0.0948782	0.0692433	-0.0151805	0.0835935	0.129038	0.188446	-0.241863	0.373394	0	0.437223	-0.0353117	0.391388	0.226954	-0.0601351	0.114015	0.440186	-0.0236906	0.119159	0.0108939	-0.058042	-0.0181993	-0.122864	0.0849652	0.358029	0.110756	0.0262476	0.109435	0.345553	-0.349767	-0.239334	0.194131	0.342533	0.148644	-0.0643619	-0.0877976	-0.175939	0.0663934	0.244188	0.564599	0.338137	0.395984	-0.0176456
70	VSN	0.0861722	0.014269	-0.212014	0.427924	-0.234395	-0.012564	-0.0968445	-0.0167561	-0.243201	0.0250038	0.319871	0.321299	-0.139968	0.336388	0.437223	0	-0.243124	0.0382505	-0.116212	-0.00612572	0.187814	0.186946	0.053693	0.168027	-0.204006	-0.259879	-0.121055	0.188506	0.180763	0.101402	0.324678	-0.18537	-0.0657424	0.190872	0.0477743	0.140324	0.598204	0.494616	0.31369	0.0928663	0.292997	0.302522	-0.152411	0.199321	0.324343	0.196913	0.162305	-0.208403
57	LGN	0.164711	0.3059	0.0339416	-0.153847	0.135797	0.369699	0.171035	0.0727941	0.0448565	0.0284045	0.140141	0.199841	0.13385	0.346306	-0.0353117	-0.243124	0	0.437711	0.306585	0.559706	0.116783	0.318241	0.0261723	0.196238	0.154919	0.251424	0.00394464	-0.0177726	0.0403345	0.170776	0.0229122	0.282782	0.184707	-0.106482	0.0678931	0.0693407	-0.000185743	0.0556358	-0.0705949	0.109698	0.0785791	0.0636636	-0.0446213	0.258785	0.149503	-0.0332559	0.0371197	-0.0794106
46	LGN	0.00745767	0.0935698	-0.120373	0.188971	0.0317458	0.259647	-0.0538445	0.055508	0.0856547	-0.0577328	0.180023	0.17536	-0.0773859	0.269569	0.391388	0.0382505	0.437711	0	0.0849805	0.511193	0.240984	0.475188	0.0488664	0.279757	0.167244	0.517184	-0.0120782	-0.0924892	0.270799	0.328344	0.0145508	0.450625	0.184364	0.234366	-0.071937	-0.040594	0.0689961	0.0288516	0.217839	0.016937	-0.0912362	-0.15384	0.0865993	0.262243	0.265532	0.50939	0.00727001	-0.0714955
21	LGN	0.369508	0.391697	0.135202	0.233559	0.265835	0.198859	0.24093	0.01167	0.0783826	-0.0522463	-0.112694	-0.105716	0.00556212	0.0629772	0.226954	-0.116212	0.306585	0.0849805	0	0.0635193	0.128884	-0.0718584	-0.182246	-0.321982	0.271951	-0.0774791	0.0925888	-0.257397	-0.192293	0.114267	0.0608683	0.0600924	0.376755	-0.050507	-0.119148	-0.159628	-0.149933	0.111046	-0.199922	-0.0948751	-0.132192	-0.182106	-0.0372486	0.249003	0.313617	-0.199815	0.325494	0.105645
34	LGN	0.000587744	0.131845	-0.0241705	-0.0522465	0.134449	0.369219	0.104109	-0.0195045	0.0927926	-0.109101	0.0383244	0.0455009	0.0229068	0.275056	-0.0601351	-0.00612572	0.559706	0.511193	0.0635193	0	0.454145	0.213132	0.0418831	0.304461	-0.028937	0.185311	0.132233	0.059131	0.0590193	0.136174	0.154663	0.192165	0.295606	-0.0702339	0.0795883	0.0898307	0.0238418	-0.0448551	0.121594	0.0603666	0.0854193	0.0317451	0.0458392	0.22625	0.0652106	0.0570241	-0.096094	-0.0776803
35	LGN	0.234888	0.0987192	-0.0494781	0.428311	0.139993	0.411259	0.253772	0.0238432	-0.105619	-0.0792818	0.132194	0.0488482	-0.0488914	0.0637414	0.114015	0.187814	0.116783	0.240984	0.128884	0.454145	0	-0.155233	0.189745	0.133354	0.0378556	0.178526	0.0615824	0.154692	0.113946	-0.117532	0.278679	0.0851169	0.213306	0.0397313	0.0465295	-0.016611	0.168689	0.163963	0.259991	0.0505826	0.0862401	0.210722	-0.13207	0.207098	0.274336	0.0743642	0.0422207	-0.157301
79	LECN	-0.0813116	0.226315	-0.257902	0.0901168	-0.0748401	0.0671694	-0.121899	0.107968	0.0817457	0.111231	0.0911646	0.272151	-0.124218	0.482096	0.440186	0.186946	0.318241	0.475188	-0.0718584	0.213132	-0.155233	0	0.0547895	0.569814	0.104234	0.223891	-0.0717156	0.0520693	0.409457	0.564565	0.141785	0.161838	-0.0289241	0.455834	-0.197516	-0.0632014	0.0532956	0.238501	0.385293	0.0558638	0.032058	-0.0923079	0.116132	0.231608	0.123521	0.475773	-0.11705	-0.0798129
87	LECN	-0.101145	-0.179527	-0.101125	-0.0533813	0.120504	0.1083	0.0668505	-0.121584	0.0111489	-0.273153	-0.0125532	-0.00606671	0.132769	0.0737183	-0.0236906	0.053693	0.0261723	0.0488664	-0.182246	0.0418831	0.189745	0.0547895	0	0.200938	-0.0447833	0.0527938	0.0426832	0.447461	0.171081	0.0276316	0.248054	-0.189218	-0.0614661	-0.0142497	0.0416111	0.147697	0.206899	-0.0159441	0.185951	0.213045	0.150754	0.221216	0.171509	-0.0264701	-0.0833367	0.174432	-0.131635	-0.173568
59	LECN	-0.141154	0.0640117	-0.244372	-0.0759027	0.0458636	0.0575343	-0.100055	0.0287321	0.0284795	-0.00885793	0.0370476	0.115611	-0.0878559	0.303519	0.119159	0.168027	0.196238	0.279757	-0.321982	0.304461	0.133354	0.569814	0.200938	0	0.0337439	0.402817	0.0893232	0.346527	0.526361	0.376255	0.246276	0.0935491	-0.0582657	0.292009	-0.192654	-0.111442	0.0631686	0.155087	0.589254	0.0178089	0.0153929	0.0346755	0.133943	-2.35374e-06	0.0290699	0.567399	-0.335272	-0.166363
20	DDMN	0.406713	0.546156	-0.134594	0.25863	0.136561	0.148269	0.0506908	0.292448	0.069347	0.12765	0.0789867	0.0361457	-0.0495351	-0.271972	0.0108939	-0.204006	0.154919	0.167244	0.271951	-0.028937	0.0378556	0.104234	-0.0447833	0.0337439	0	0.566823	0.0420033	0.0497565	0.39099	0.0303389	0.218541	0.304687	0.214411	0.359476	0.0181563	-0.0149871	0.014296	0.0292935	0.272627	0.00447663	0.00616104	-0.0745569	0.00674622	-0.0692198	-0.0850624	0.207821	0.0515932	-0.0148126
22	DDMN	0.134901	0.173307	-0.0530252	0.153508	0.0819919	0.200879	-0.104305	0.211525	0.0319438	-0.0189647	0.149719	0.190649	-0.0452206	-0.0760145	-0.058042	-0.259879	0.251424	0.517184	-0.0774791	0.185311	0.178526	0.223891	0.0527938	0.402817	0.566823	0	-0.0171917	0.177292	0.623524	0.241124	0.029524	0.533224	0.0819267	0.287752	0.0788236	0.0380989	0.0184281	-0.0383829	0.397448	0.200281	0.037933	0.0225657	0.028812	-0.0655802	-0.0463134	0.457805	-0.250882	-0.0585903
72	DDMN	-0.0652603	-0.11035	0.11853	-0.108785	0.123715	0.109232	0.0483411	-0.0371947	0.0577888	0.0308688	-0.0445666	-0.22301	-0.0497313	-0.0948	-0.0181993	-0.121055	0.00394464	-0.0120782	0.0925888	0.132233	0.0615824	-0.0717156	0.0426832	0.0893232	0.0420033	-0.0171917	0	0.203463	-0.0639954	0.0796391	-0.00156329	-0.0783733	-0.032812	0.0586496	-0.0285199	-0.0709659	-0.19247	-0.0165333	0.0210243	0.188987	0.0126313	-0.0932646	0.123057	-0.0581742	0.0432766	0.0665526	-0.0944811	0.0497335
42	DDMN	-0.136988	-0.156872	-0.214866	-0.0113371	0.258585	0.245113	0.00836064	0.00948022	-0.184297	-0.0565412	0.141138	0.0298315	0.060058	0.0162534	-0.122864	0.188506	-0.0177726	-0.0924892	-0.257397	0.059131	0.154692	0.0520693	0.447461	0.346527	0.0497565	0.177292	0.203463	0	0.333782	0.0208961	0.430603	-0.10571	-0.197536	0.216677	0.408638	0.307495	0.210055	0.273212	0.570406	0.563409	0.550841	0.238099	0.0331011	0.0143612	-0.0760993	0.290516	-0.204625	-0.27513
31	DDMN	0.2125	0.203416	-0.113315	0.224453	0.0433854	0.189064	-0.0649556	0.17873	-0.0984613	0.21185	0.300406	0.327759	-0.109695	0.0745608	0.0849652	0.180763	0.0403345	0.270799	-0.192293	0.0590193	0.113946	0.409457	0.171081	0.526361	0.39099	0.623524	-0.0639954	0.333782	0	0.147565	0.292807	0.303035	-0.134959	0.460612	0.0594056	0.0883947	0.210632	0.29491	0.659503	0.186525	0.158903	0.0983505	-0.00652092	0.0806318	0.0184693	0.532102	-0.201713	-0.198396
73	DDMN	-0.00279486	0.267846	0.0039259	0.195647	-0.0536664	-0.0546654	-0.146601	0.176147	0.130841	-0.0262137	-0.0859375	0.00206111	-0.139176	0.391701	0.358029	0.101402	0.170776	0.328344	0.114267	0.136174	-0.117532	0.564565	0.0276316	0.376255	0.0303389	0.241124	0.0796391	0.0208961	0.147565	0	-0.0480552	0.0074286	0.0382294	0.269053	-0.25262	-0.175638	-0.132251	0.163365	0.202826	-0.0825859	-0.0739985	-0.16553	0.232495	0.28449	0.342838	0.386714	-0.0727473	-0.0492008
80	DDMN	0.218998	0.203129	-0.153712	0.25725	0.122732	0.181602	0.121204	-0.0208193	-0.194968	-0.0313231	0.170984	0.0549635	-0.0685359	-0.00450488	0.110756	0.324678	0.0229122	0.0145508	0.0608683	0.154663	0.278679	0.141785	0.248054	0.246276	0.218541	0.029524	-0.00156329	0.430603	0.292807	-0.0480552	0	-0.109877	0.231643	0.403299	0.111771	0.157232	0.234917	0.413907	0.478571	0.163888	0.276286	0.180123	-0.0236269	0.00215993	0.0768258	0.22734	0.0958233	-0.136226
100	DDMN	0.123708	0.0876263	-0.146841	0.0480977	-0.0760153	0.215827	-0.0386315	0.0882861	-0.0405812	0.156517	0.270421	0.285581	-0.0716882	0.0168767	0.0262476	-0.18537	0.282782	0.450625	0.0600924	0.192165	0.0851169	0.161838	-0.189218	0.0935491	0.304687	0.533224	-0.0783733	-0.10571	0.303035	0.0074286	-0.109877	0	0.0585522	0.10864	0.0799415	0.0580038	0.0891758	-0.072462	0.117035	0.0365867	-0.0539989	-0.0357662	-0.0132605	0.208786	0.0824376	0.210077	0.0191331	0.000891276
68	PSN	0.174534	0.213682	0.00254779	0.266304	0.0712282	0.144481	0.0893004	-0.0624585	-0.00316127	-0.041572	-0.037318	-0.101238	-0.03971	-0.143359	0.109435	-0.0657424	0.184707	0.184364	0.376755	0.295606	0.213306	-0.0289241	-0.0614661	-0.0582657	0.214411	0.0819267	-0.032812	-0.197536	-0.134959	0.0382294	0.231643	0.0585522	0	0.0638062	-0.0991912	0.0127872	-0.0215202	-0.00453688	0.0173218	-0.0848914	-0.0785445	-0.0316375	0.0396215	-0.00394844	0.0997432	-0.0220713	0.125275	0.0785431
82	PCN	0.234205	0.229232	-0.287108	0.476116	-0.00208977	0.0985313	-0.0627157	0.214749	-0.191849	0.217939	0.200367	0.140929	-0.204738	0.00985084	0.345553	0.190872	-0.106482	0.234366	-0.050507	-0.0702339	0.0397313	0.455834	-0.0142497	0.292009	0.359476	0.287752	0.0586496	0.216677	0.460612	0.269053	0.403299	0.10864	0.0638062	0	-0.0582421	-0.0963821	0.120044	0.394158	0.601007	0.0600752	0.0288418	0.0024917	0.000824719	-0.000226607	0.0959067	0.394022	-0.00018073	-0.0459435
43	PCN	0.0271242	-0.015761	0.0388887	-0.0660582	0.0866614	0.176197	0.0419509	0.00910477	-0.247196	-0.0658913	0.170023	-0.0233857	0.154958	-0.25322	-0.349767	0.0477743	0.0678931	-0.071937	-0.119148	0.0795883	0.0465295	-0.197516	0.0416111	-0.192654	0.0181563	0.0788236	-0.0285199	0.408638	0.0594056	-0.25262	0.111771	0.0799415	-0.0991912	-0.0582421	0	0.430861	0.15313	0.0677479	0.0982992	0.453151	0.424839	0.331942	-0.0853763	0.0487809	-0.27744	-0.0232562	0.00675668	-0.0109152
78	PVN	0.00700322	0.0257805	-0.0510446	-0.125349	0.0833313	0.208774	0.116599	-0.00971459	-0.0987737	-0.136306	0.353389	0.347493	0.131892	0.0498511	-0.239334	0.140324	0.0693407	-0.040594	-0.159628	0.0898307	-0.016611	-0.0632014	0.147697	-0.111442	-0.0149871	0.0380989	-0.0709659	0.307495	0.0883947	-0.175638	0.157232	0.0580038	0.0127872	-0.0963821	0.430861	0	0.303977	0.0766084	-0.00787302	0.497745	0.603853	0.485491	-0.0123708	0.0634623	-0.166129	-0.0626775	0.0157479	-0.208298
53	VDMN	0.115588	0.0397798	-0.227875	0.33843	-0.0970254	0.200716	-0.0276332	-0.00290793	-0.318441	0.0296495	0.374135	0.510041	-0.120974	0.103088	0.194131	0.598204	-0.000185743	0.0689961	-0.149933	0.0238418	0.168689	0.0532956	0.206899	0.0631686	0.014296	0.0184281	-0.19247	0.210055	0.210632	-0.132251	0.234917	0.0891758	-0.0215202	0.120044	0.15313	0.303977	0	0.404873	0.292064	0.252952	0.23872	0.470037	-0.204336	0.0420724	0.10589	0.0947579	0.0785941	-0.230772
58	VDMN	0.263251	0.259753	-0.158364	0.400135	0.00124814	0.201384	-0.0559714	0.139389	-0.268154	0.119331	0.303438	0.288207	-0.169784	0.222472	0.342533	0.494616	0.0556358	0.0288516	0.111046	-0.0448551	0.163963	0.238501	-0.0159441	0.155087	0.0292935	-0.0383829	-0.0165333	0.273212	0.29491	0.163365	0.413907	-0.072462	-0.00453688	0.394158	0.0677479	0.0766084	0.404873	0	0.42905	0.277898	0.247788	0.262658	-0.180462	0.137197	0.217227	0.150567	0.166616	-0.2364
76	VDMN	0.058869	0.19611	-0.26893	0.355041	0.00428832	0.195687	-0.145204	0.111305	-0.278925	0.132926	0.235029	0.153511	-0.235991	-0.0782952	0.148644	0.31369	-0.0705949	0.217839	-0.199922	0.121594	0.259991	0.385293	0.185951	0.589254	0.272627	0.397448	0.0210243	0.570406	0.659503	0.202826	0.478571	0.117035	0.0173218	0.601007	0.0982992	-0.00787302	0.292064	0.42905	0	0.0968407	0.190955	0.0312789	0.0541822	0.0285532	-0.0555057	0.66123	-0.311792	-0.136321
71	VDMN	0.0979483	0.0520611	-0.0171429	-0.0347901	0.248711	0.339444	0.114317	0.00312258	-0.0925771	-0.0942797	0.280084	0.236737	0.173055	0.123428	-0.0643619	0.0928663	0.109698	0.016937	-0.0948751	0.0603666	0.0505826	0.0558638	0.213045	0.0178089	0.00447663	0.200281	0.188987	0.563409	0.186525	-0.0825859	0.163888	0.0365867	-0.0848914	0.0600752	0.453151	0.497745	0.252952	0.277898	0.0968407	0	0.713427	0.383508	-0.00153118	0.04733	-0.110018	0.0218397	0.0181954	-0.141886
65	VDMN	0.0856757	0.0434611	-0.065785	0.0078656	0.216126	0.254377	0.0935067	0.0320686	-0.0584376	-0.0952428	0.269322	0.163199	0.131611	0.0985935	-0.0877976	0.292997	0.0785791	-0.0912362	-0.132192	0.0854193	0.0862401	0.032058	0.150754	0.0153929	0.00616104	0.037933	0.0126313	0.550841	0.158903	-0.0739985	0.276286	-0.0539989	-0.0785445	0.0288418	0.424839	0.603853	0.23872	0.247788	0.190955	0.713427	0	0.369399	0.0100791	0.0634661	-0.075485	-0.0182862	0.0419649	-0.308775
17	VDMN	0.169988	0.178854	-0.0313886	0.0395911	0.00769284	0.170773	0.0820722	-0.015812	-0.293089	-0.0795501	0.333748	0.466134	0.0271963	0.105266	-0.175939	0.302522	0.0636636	-0.15384	-0.182106	0.0317451	0.210722	-0.0923079	0.221216	0.0346755	-0.0745569	0.0225657	-0.0932646	0.238099	0.0983505	-0.16553	0.180123	-0.0357662	-0.0316375	0.0024917	0.331942	0.485491	0.470037	0.262658	0.0312789	0.383508	0.369399	0	-0.170587	0.0790931	-0.164652	-0.164479	0.0585174	-0.239648
67	RECN	-0.132228	-0.0952301	0.0227754	-0.0959877	0.00436728	-0.165928	-0.1635	-0.0193869	0.0639333	-0.062459	-0.218372	-0.31668	-0.0708815	0.00316767	0.0663934	-0.152411	-0.0446213	0.0865993	-0.0372486	0.0458392	-0.13207	0.116132	0.171509	0.133943	0.00674622	0.028812	0.123057	0.0331011	-0.00652092	0.232495	-0.0236269	-0.0132605	0.0396215	0.000824719	-0.0853763	-0.0123708	-0.204336	-0.180462	0.0541822	-0.00153118	0.0100791	-0.170587	0	0.012573	-0.0249181	0.18257	-0.110558	0.23323
30	RECN	0.267149	0.303513	0.115258	0.230854	0.0715208	0.244106	0.171013	0.0911292	-0.0492083	-0.02668	0.205357	0.223309	0.181583	0.447929	0.244188	0.199321	0.258785	0.262243	0.249003	0.22625	0.207098	0.231608	-0.0264701	-2.35374e-06	-0.0692198	-0.0655802	-0.0581742	0.0143612	0.0806318	0.28449	0.00215993	0.208786	-0.00394844	-0.000226607	0.0487809	0.0634623	0.0420724	0.137197	0.0285532	0.04733	0.0634661	0.0790931	0.012573	0	0.3233	-0.00235302	0.10079	-0.0940945
32	RECN	0.156649	0.125513	-0.0129616	0.431792	0.030679	0.206252	0.126819	0.068168	0.129273	-0.0379756	0.150714	0.0615288	0.00336204	0.492119	0.564599	0.324343	0.149503	0.265532	0.313617	0.0652106	0.274336	0.123521	-0.0833367	0.0290699	-0.0850624	-0.0463134	0.0432766	-0.0760993	0.0184693	0.342838	0.0768258	0.0824376	0.0997432	0.0959067	-0.27744	-0.166129	0.10589	0.217227	-0.0555057	-0.110018	-0.075485	-0.164652	-0.0249181	0.3233	0	0.136458	0.345314	-0.128174
88	RECN	-0.238217	-0.0904217	-0.268406	0.262747	-0.0149997	0.0139286	-0.279667	0.0488277	0.0189667	0.0292672	0.115398	-0.00534503	-0.181576	0.00910639	0.338137	0.196913	-0.0332559	0.50939	-0.199815	0.0570241	0.0743642	0.475773	0.174432	0.567399	0.207821	0.457805	0.0665526	0.290516	0.532102	0.386714	0.22734	0.210077	-0.0220713	0.394022	-0.0232562	-0.0626775	0.0947579	0.150567	0.66123	0.0218397	-0.0182862	-0.164479	0.18257	-0.00235302	0.136458	0	-0.237242	-0.0186508
37	RECN	0.342213	0.146679	-0.0318341	0.405129	-0.00314996	0.102472	0.271662	0.101619	0.00252702	0.00791314	0.0680881	0.00712015	-0.014715	0.156176	0.395984	0.162305	0.0371197	0.00727001	0.325494	-0.096094	0.0422207	-0.11705	-0.131635	-0.335272	0.0515932	-0.250882	-0.0944811	-0.204625	-0.201713	-0.0727473	0.0958233	0.0191331	0.125275	-0.00018073	0.00675668	0.0157479	0.0785941	0.166616	-0.311792	0.0181954	0.0419649	0.0585174	-0.110558	0.10079	0.345314	-0.237242	0	-0.0652944
51	SMN	-0.1009	-0.10445	0.0823259	-0.111892	-0.129516	-0.21131	-0.143336	-0.03137	-0.0295616	0.110884	-0.235918	-0.201915	-0.163316	-0.229963	-0.0176456	-0.208403	-0.0794106	-0.0714955	0.105645	-0.0776803	-0.157301	-0.0798129	-0.173568	-0.166363	-0.0148126	-0.0585903	0.0497335	-0.27513	-0.198396	-0.0492008	-0.136226	0.000891276	0.0785431	-0.0459435	-0.0109152	-0.208298	-0.230772	-0.2364	-0.136321	-0.141886	-0.308775	-0.239648	0.23323	-0.0940945	-0.128174	-0.0186508	-0.0652944	0
14	SMN	0.194699	-0.00273113	0.146305	0.176568	0.068348	0.218889	0.351145	-0.0788298	-0.156255	-0.160654	0.241757	0.130793	0.376826	0.163456	0.0116275	0.247622	-0.019091	0.000675733	-0.0186996	0.0353364	0.265386	-0.10902	0.0522001	-0.105039	-0.19061	-0.0690551	-0.00369893	0.147615	-0.0312379	-0.0929901	0.0770998	-0.0947157	-0.105635	-0.0574978	0.239806	0.197764	0.271487	0.105907	-0.0580565	0.251228	0.2685	0.253851	-0.128001	0.211639	0.121577	-0.16237	0.146229	-0.138868
12	SMN	0.219606	-0.0262688	0.10858	0.0726806	0.117242	0.0316666	0.353205	-0.0921748	0.108993	-0.226921	-0.0649517	-0.129346	0.230529	0.174232	0.0788599	0.0127472	-0.0228749	-0.1516	0.21882	0.00940436	0.152682	-0.291105	-0.078908	-0.149941	-0.0797886	-0.233605	-0.0830768	-0.236085	-0.278616	-0.153984	0.056947	-0.247134	0.171107	-0.17288	-0.205966	-0.0233767	-0.000931491	-0.0129275	-0.403275	-0.132917	-0.00370856	-0.0371456	-0.0714051	-0.0541696	0.287365	-0.38309	0.37302	-0.0673576
50	SMN	0.181978	0.119649	0.0208139	0.0110458	0.0616592	0.155968	0.159559	0.166651	-0.0159655	0.194688	0.12417	0.125169	-0.0441942	0.0589134	0.110506	-0.0588496	0.145569	0.0996747	0.0534187	0.130198	0.0481599	0.0515326	-0.0380533	0.124176	0.105059	0.074911	0.379451	0.118386	0.0958785	0.0688167	0.0110366	0.10704	-0.00804458	0.0985581	0.121903	0.0829445	-0.096436	0.129436	0.0632832	0.201358	0.0863128	0.0491852	0.156304	0.11978	0.0816875	0.0325121	-0.0163751	0.0973968
	name of IC	26	91	66	64	25	86	44	29	23	7	40	60	49	33	5	70	57	46	21	34	35	79	87	59	20	22	72	42	31	73	80	100	68	82	43	78	53	58	76	71	65	17	67	30	32	88	37	51
	name of ICN	ASN	ASN	ASN	ASN	AUN	AUN	AUN	AGN	AGN	AGN	HVN	HVN	VSN	VSN	VSN	VSN	LGN	LGN	LGN	LGN	LGN	LECN	LECN	LECN	DDMN	DDMN	DDMN	DDMN	DDMN	DDMN	DDMN	DDMN	PSN	PCN	PCN	PVN	VDMN	VDMN	VDMN	VDMN	VDMN	VDMN	RECN	RECN	RECN	RECN	RECN	SMN
[truncated: 3 more columns]

## Sheet: real-pre-State3
name of IC	name of ICN	correlations
26	ASN	0	0.793273	0.341487	0.871434	0.243716	0.495635	0.555777	0.514514	0.163531	-0.0476948	-0.259216	0.485829	0.118631	0.457075	0.576424	-0.19572	0.401453	0.395541	0.201341	-0.151855	0.370944	0.140893	-0.138469	-0.256326	0.319287	0.56414	0.0777292	-0.364559	0.272669	0.382639	-0.0189252	0.332002	0.0993162	0.179525	0.261267	0.0724872	-0.200887	0.55257	0.128697	0.160579	-0.0664127	0.157477	-0.207798	0.391826	0.529765	-0.0340522	0.648936	0.10988
91	ASN	0.793273	0	0.536897	1.18672	0.263494	0.454919	0.586021	0.626423	0.564167	-0.207711	-0.450799	0.405611	0.168458	0.44911	0.741702	-0.708404	0.517534	0.567713	0.532009	-0.555498	0.554449	-0.136825	-0.367819	-0.533996	0.618207	0.642991	0.037019	-0.688607	0.0381176	0.648463	-0.373781	0.354992	-0.0135116	-0.205113	-0.133341	-0.308303	-0.254986	0.310196	-0.284822	0.000909095	-0.456698	-0.0645172	-0.54788	0.581071	0.724271	-0.0461688	0.48726	-0.0734452
66	ASN	0.341487	0.536897	0	0.543162	-0.0404704	0.150079	0.815504	0.171323	0.630116	-0.161339	-0.337299	0.0228647	0.395154	0.41364	0.590819	-0.599179	0.207678	0.773638	0.641912	-0.157217	0.4458	-0.159944	-0.192481	-0.45766	-0.000445047	0.233165	0.126714	-0.745339	-0.0967148	0.561566	-0.30987	-0.0747452	0.117525	-0.375281	-0.346849	-0.665349	-0.464942	0.0619821	-0.410907	-0.426727	-0.737341	-0.339471	-0.521363	0.568175	0.823785	0.139653	0.407175	-0.168353
64	ASN	0.871434	1.18672	0.543162	0	0.041123	0.332951	0.444985	0.593109	0.373703	-0.211847	-0.249835	0.500578	0.146145	0.472745	1.07086	-0.239671	0.263647	0.601971	0.359521	-0.372011	0.526427	0.162016	-0.0815448	-0.342661	0.283691	0.507503	-0.123895	-0.634485	0.195238	0.443104	-0.114757	0.221474	0.227647	0.21865	-0.0230214	-0.142684	-0.196566	0.305937	-0.0569242	-0.00931914	-0.236399	0.0312476	-0.418934	0.459025	0.667883	0.117292	0.736819	-0.089379
25	AUN	0.243716	0.263494	-0.0404704	0.041123	0	0.621676	0.535134	0.204508	0.0749561	-0.248769	0.0494854	-0.0304467	0.378579	0.0139055	-0.0283011	-0.399185	0.373921	0.152001	0.479895	0.113717	0.399989	-0.311912	-0.242622	-0.195695	0.44541	0.291452	0.0672416	-0.137994	0.0138194	0.124844	-0.380644	0.135054	-0.0763025	0.000463043	-0.151665	0.0962179	-0.135433	-0.0264254	-0.163739	0.332121	-0.135226	-0.230164	-0.188278	0.241161	0.185842	-0.0301108	0.0537532	0.0414595
86	AUN	0.495635	0.454919	0.150079	0.332951	0.621676	0	0.386083	0.380419	-0.0268413	-0.334796	-0.07149	0.323724	0.385506	0.172017	0.166171	-0.180154	0.425818	0.143862	0.44581	-0.139367	0.273614	0.049669	-0.211133	-0.239897	0.336242	0.0856794	-0.0879084	-0.214739	-0.0304023	0.0509244	-0.070064	0.212386	0.0425514	-0.0390043	0.109429	0.0355527	-0.203146	0.257045	0.163247	0.14257	-0.0177032	-0.0152262	-0.121133	0.282342	0.279795	-0.147008	0.437741	0.0515385
44	AUN	0.555777	0.586021	0.815504	0.444985	0.535134	0.386083	0	0.0993866	0.696441	-0.00317103	-0.0921894	0.389254	0.401315	0.322545	0.49298	-0.761188	0.457052	0.768339	0.838679	-0.017209	0.685481	-0.205217	-0.263583	-0.658927	0.168245	0.244959	-0.0335208	-0.822949	-0.268742	0.299637	-0.318453	0.0775075	0.0255753	-0.377497	-0.270248	-0.40347	-0.294362	-0.13781	-0.474692	-0.246688	-0.619041	-0.469859	-0.584538	0.59777	0.698498	0.22778	0.700782	-0.300684
29	AGN	0.514514	0.626423	0.171323	0.593109	0.204508	0.380419	0.0993866	0	0.274217	0.0300798	-0.295932	0.10143	0.183476	0.0775267	0.261533	-0.193858	0.240242	0.241314	0.0797171	-0.130879	0.196036	-0.135448	-0.287683	-0.0923868	0.69273	0.408802	0.0455299	-0.243934	0.0560242	0.322751	-0.0819429	0.16585	-0.0343892	-0.137207	0.135655	-0.118114	-0.354327	0.33693	0.0493844	-0.0615873	-0.0956295	0.16363	-0.144864	0.209946	0.365479	0.13806	0.297754	0.178149
23	AGN	0.163531	0.564167	0.630116	0.373703	0.0749561	-0.0268413	0.696441	0.274217	0	0.052218	-0.267977	0.0161427	0.12073	0.367802	0.380225	-1.12376	0.42702	0.570416	0.589991	-0.272432	0.669096	-0.312914	-0.364499	-0.470518	0.179297	0.432223	0.223925	-0.654119	-0.0894694	0.745236	-0.777528	0.26318	-0.110815	-0.516572	-0.564013	-0.775798	-0.241017	-0.198271	-0.674648	-0.269895	-0.96523	-0.45009	-0.904838	0.746448	0.806297	0.0961309	0.199675	-0.410642
7	AGN	-0.0476948	-0.207711	-0.161339	-0.211847	-0.248769	-0.334796	-0.00317103	0.0300798	0.052218	0	0.0201268	0.0242452	-0.254528	-0.457643	-0.260591	0.0322689	-0.328087	-0.27235	-0.210595	-0.120929	-0.289316	-0.226337	-0.101567	0.0266838	0.189659	-0.301777	0.0627579	0.215236	0.0235458	-0.204899	0.0282172	-0.209785	-0.195455	-0.00656767	-0.0650993	0.0214073	0.0664373	-0.108845	-0.0843529	-0.0921609	0.0816241	-0.121623	-0.0527018	-0.279398	-0.318952	0.00119623	0.0828935	0.088089
40	HVN	-0.259216	-0.450799	-0.337299	-0.249835	0.0494854	-0.07149	-0.0921894	-0.295932	-0.267977	0.0201268	0	0.229887	-0.0128363	-0.224557	-0.269252	0.531623	-0.268286	-0.22676	-0.403624	0.454452	-0.213921	0.0300344	0.394194	0.260424	-0.28298	-0.0912273	-0.145466	0.480557	-0.0527667	-0.306611	0.283802	-0.239838	0.125056	0.33196	-0.105614	0.429439	0.562211	-0.586544	0.135864	0.150183	0.341463	-0.0216226	0.469275	-0.139369	-0.521115	0.000493285	0.0503989	0.0227877
60	HVN	0.485829	0.405611	0.0228647	0.500578	-0.0304467	0.323724	0.389254	0.10143	0.0161427	0.0242452	0.229887	0	0.162496	0.359729	0.56045	0.01394	0.105509	0.483211	0.0366365	-0.0567546	0.104767	0.310237	-0.0622809	-0.275585	0.149627	0.173213	-0.362932	-0.271573	0.299882	0.0611842	0.00653555	0.218024	-0.211438	0.217231	-0.118212	0.289347	0.406345	0.132935	-0.228413	0.130517	-0.0634495	0.182935	-0.217015	0.164239	0.0709732	0.160439	0.488765	-0.189946
49	VSN	0.118631	0.168458	0.395154	0.146145	0.378579	0.385506	0.401315	0.183476	0.12073	-0.254528	-0.0128363	0.162496	0	0.0683258	0.0914922	-0.114202	0.229679	0.159329	0.204	0.161176	0.109419	-0.187565	-0.0912708	-0.185859	0.282512	0.0761483	-0.0230762	-0.184472	0.0525365	0.0437376	-0.122341	-0.0063328	-0.00400738	-0.116453	-0.21568	-0.0278366	-0.229798	-0.0439977	-0.309952	0.0491685	-0.0816435	-0.221668	-0.225924	0.125445	0.378044	0.116333	0.193316	-0.265867
33	VSN	0.457075	0.44911	0.41364	0.472745	0.0139055	0.172017	0.322545	0.0775267	0.367802	-0.457643	-0.224557	0.359729	0.0683258	0	0.611902	-0.203926	0.69481	0.511422	0.227213	-0.197968	0.469098	0.450871	0.00149603	-0.144118	-0.087123	0.554153	-0.0363793	-0.258407	0.291207	0.638606	-0.132498	0.35862	-0.100546	-0.140492	0.0515705	-0.140761	-0.23925	0.283465	-0.236536	0.130008	-0.253068	0.149377	-0.387557	0.471997	0.706351	-0.0592059	0.242923	-0.128985
5	VSN	0.576424	0.741702	0.590819	1.07086	-0.0283011	0.166171	0.49298	0.261533	0.380225	-0.260591	-0.269252	0.56045	0.0914922	0.611902	0	-0.255877	0.36303	0.95004	0.362241	-0.291221	0.4266	0.408359	0.0114415	-0.330678	0.0670954	0.454072	-0.0515423	-0.859309	0.162052	0.465979	-0.206753	0.216709	0.0636548	-0.046832	-0.228743	-0.181953	-0.0394059	0.20401	-0.197324	-0.165163	-0.49775	-0.0356232	-0.479273	0.596605	0.733103	0.229401	0.552393	-0.201106
70	VSN	-0.19572	-0.708404	-0.599179	-0.239671	-0.399185	-0.180154	-0.761188	-0.193858	-1.12376	0.0322689	0.531623	0.01394	-0.114202	-0.203926	-0.255877	0	-0.668191	-0.576537	-0.919803	0.364432	-0.638417	0.49454	0.53749	0.639155	-0.429178	-0.557095	-0.225441	0.807878	0.0472321	-0.542545	1.01346	-0.439239	0.271489	0.788804	0.615673	0.779222	0.378861	-0.0255735	0.739454	0.174612	1.08099	0.599817	0.971141	-0.628828	-0.719728	0.0117652	-0.126531	0.237388
57	LGN	0.401453	0.517534	0.207678	0.263647	0.373921	0.425818	0.457052	0.240242	0.42702	-0.328087	-0.268286	0.105509	0.229679	0.69481	0.36303	-0.668191	0	0.474438	0.469921	-0.0599641	0.655337	0.0645689	-0.178358	-0.145756	0.176964	0.716047	0.119914	-0.430878	0.0926561	0.466921	-0.363809	0.622797	-0.0750985	-0.348494	0.11403	-0.387275	-0.301658	0.277362	-0.208793	0.145759	-0.350553	-0.116404	-0.428768	0.43178	0.558851	-0.0938095	0.103451	-0.141678
46	LGN	0.395541	0.567713	0.773638	0.601971	0.152001	0.143862	0.768339	0.241314	0.570416	-0.27235	-0.22676	0.483211	0.159329	0.511422	0.95004	-0.576537	0.474438	0	0.531084	-0.174202	0.613729	0.133535	-0.365328	-0.545106	0.0960057	0.539186	-0.0139609	-0.992085	0.0373789	0.545364	-0.360507	0.307414	0.0265125	-0.226052	-0.428681	-0.394013	-0.215954	-0.0567245	-0.376477	-0.370001	-0.819652	-0.437067	-0.594827	0.645716	0.84018	0.321206	0.448261	-0.255607
21	LGN	0.201341	0.532009	0.641912	0.359521	0.479895	0.44581	0.838679	0.0797171	0.589991	-0.210595	-0.403624	0.0366365	0.204	0.227213	0.362241	-0.919803	0.469921	0.531084	0	-0.23367	0.565231	-0.4275	-0.427103	-0.998201	0.292697	0.201587	-0.0647045	-0.828753	-0.40599	0.331448	-0.734749	0.260197	0.129183	-0.514917	-0.556026	-0.5614	-0.176745	0.0356569	-0.727764	-0.322434	-0.930599	-0.577752	-0.731842	0.660854	0.775527	0.00703445	0.356051	-0.374307
34	LGN	-0.151855	-0.555498	-0.157217	-0.372011	0.113717	-0.139367	-0.017209	-0.130879	-0.272432	-0.120929	0.454452	-0.0567546	0.161176	-0.197968	-0.291221	0.364432	-0.0599641	-0.174202	-0.23367	0	0.177602	-0.0345746	0.101806	0.42886	-0.274776	0.0031876	-0.305533	0.357266	-0.0984775	-0.23164	0.354721	-0.0826139	0.432586	0.0697372	0.0738758	0.350715	0.0944163	-0.447312	0.237759	0.0662547	0.313782	-0.064896	0.499414	-0.149063	-0.315955	0.185752	-0.0420139	0.00519727
35	LGN	0.370944	0.554449	0.4458	0.526427	0.399989	0.273614	0.685481	0.196036	0.669096	-0.289316	-0.213921	0.104767	0.109419	0.469098	0.4266	-0.638417	0.655337	0.613729	0.565231	0.177602	0	-0.121761	-0.478294	-0.220847	0.196263	0.69521	0.0317692	-0.525614	0.115015	0.612579	-0.337809	0.445788	0.0416688	-0.20656	-0.132516	-0.383936	-0.217124	-0.0691383	-0.183366	0.0562076	-0.383006	-0.153836	-0.491117	0.790546	0.693619	0.217043	0.169536	-0.182945
79	LECN	0.140893	-0.136825	-0.159944	0.162016	-0.311912	0.049669	-0.205217	-0.135448	-0.312914	-0.226337	0.0300344	0.310237	-0.187565	0.450871	0.408359	0.49454	0.0645689	0.133535	-0.4275	-0.0345746	-0.121761	0	0.412478	0.369914	-0.342768	0.0198889	-0.165419	0.154775	0.531759	0.00326028	0.456487	0.105573	-0.0416963	0.490149	0.307224	0.350262	0.151713	0.285907	0.418027	0.305193	0.374644	0.352067	0.265521	-0.117301	-0.160497	0.089828	0.0226629	0.0910281
87	LECN	-0.138469	-0.367819	-0.192481	-0.0815448	-0.242622	-0.211133	-0.263583	-0.287683	-0.364499	-0.101567	0.394194	-0.0622809	-0.0912708	0.00149603	0.0114415	0.53749	-0.178358	-0.365328	-0.427103	0.101806	-0.478294	0.412478	0	0.512803	-0.274635	-0.284133	0.0363387	0.543767	-0.00715034	-0.429563	0.554657	-0.468708	0.292241	0.323406	0.429483	0.201561	0.180966	0.0615219	0.412707	0.249126	0.480914	0.500377	0.549358	-0.326601	-0.305186	0.0910956	0.00168611	0.132245
59	LECN	-0.256326	-0.533996	-0.45766	-0.342661	-0.195695	-0.239897	-0.658927	-0.0923868	-0.470518	0.0266838	0.260424	-0.275585	-0.185859	-0.144118	-0.330678	0.639155	-0.145756	-0.545106	-0.998201	0.42886	-0.220847	0.369914	0.512803	0	-0.103016	-0.0232162	0.187325	0.727162	0.398573	-0.0682515	0.564547	-0.233602	0.190446	0.483559	0.44322	0.333914	0.0378167	-0.0458189	0.874696	0.261214	0.758115	0.523507	0.720291	-0.437542	-0.554152	0.367523	-0.483142	0.372195
20	DDMN	0.319287	0.618207	-0.000445047	0.283691	0.44541	0.336242	0.168245	0.69273	0.179297	0.189659	-0.28298	0.149627	0.282512	-0.087123	0.0670954	-0.429178	0.176964	0.0960057	0.292697	-0.274776	0.196263	-0.342768	-0.274635	-0.103016	0	0.486427	0.148817	-0.156503	0.118272	0.257777	-0.368294	0.236734	-0.185287	-0.0700567	-0.0766096	-0.0997983	-0.24677	0.321078	-0.120065	0.164289	-0.145018	0.038238	-0.301925	0.136989	0.217662	0.0598111	0.054761	0.160967
22	DDMN	0.56414	0.642991	0.233165	0.507503	0.291452	0.0856794	0.244959	0.408802	0.432223	-0.301777	-0.0912273	0.173213	0.0761483	0.554153	0.454072	-0.557095	0.716047	0.539186	0.201587	0.0031876	0.69521	0.0198889	-0.284133	-0.0232162	0.486427	0	0.267888	-0.236074	0.614865	0.807083	-0.438719	0.731848	-0.281222	0.021597	-0.0361816	-0.285732	-0.173755	0.256107	-0.107942	0.259868	-0.232341	0.0060613	-0.336853	0.571153	0.528031	0.167707	-0.000184359	0.0862244
72	DDMN	0.0777292	0.037019	0.126714	-0.123895	0.0672416	-0.0879084	-0.0335208	0.0455299	0.223925	0.0627579	-0.145466	-0.362932	-0.0230762	-0.0363793	-0.0515423	-0.225441	0.119914	-0.0139609	-0.0647045	-0.305533	0.0317692	-0.165419	0.0363387	0.187325	0.148817	0.267888	0	-0.049086	0.113989	0.352051	-0.252355	0.0565726	-0.134768	-0.282964	0.142462	-0.443602	-0.316941	0.166011	0.0549901	0.103436	-0.137985	0.128405	-0.000463394	0.0206939	0.240769	-0.00590904	-0.281898	0.525701
42	DDMN	-0.364559	-0.688607	-0.745339	-0.634485	-0.137994	-0.214739	-0.822949	-0.243934	-0.654119	0.215236	0.480557	-0.271573	-0.184472	-0.258407	-0.859309	0.807878	-0.430878	-0.992085	-0.828753	0.357266	-0.525614	0.154775	0.543767	0.727162	-0.156503	-0.236074	-0.049086	0	0.162086	-0.348921	0.686553	-0.338619	0.119661	0.481133	0.566502	0.592524	0.410927	0.0931189	0.648128	0.421157	1.09487	0.527223	0.744417	-0.451241	-0.815032	0.0788927	-0.418688	0.235974
31	DDMN	0.272669	0.0381176	-0.0967148	0.195238	0.0138194	-0.0304023	-0.268742	0.0560242	-0.0894694	0.0235458	-0.0527667	0.299882	0.0525365	0.291207	0.162052	0.0472321	0.0926561	0.0373789	-0.40599	-0.0984775	0.115015	0.531759	-0.00715034	0.398573	0.118272	0.614865	0.113989	0.162086	0	0.390147	-0.0157607	0.321024	-0.529057	0.448409	0.244418	0.185382	0.139581	0.465355	0.156965	0.636468	0.228518	0.576545	0.0149908	0.0978349	0.0450453	0.1162	-0.254253	0.124407
73	DDMN	0.382639	0.648463	0.561566	0.443104	0.124844	0.0509244	0.299637	0.322751	0.745236	-0.204899	-0.306611	0.0611842	0.0437376	0.638606	0.465979	-0.542545	0.466921	0.545364	0.331448	-0.23164	0.612579	0.00326028	-0.429563	-0.0682515	0.257777	0.807083	0.352051	-0.348921	0.390147	0	-0.477282	0.243233	-0.28698	-0.211777	-0.332611	-0.354201	-0.319764	0.115635	-0.375151	-0.234921	-0.50267	-0.121701	-0.41179	0.776806	0.818394	0.233553	0.0847258	-0.0458135
80	DDMN	-0.0189252	-0.373781	-0.30987	-0.114757	-0.380644	-0.070064	-0.318453	-0.0819429	-0.777528	0.0282172	0.283802	0.00653555	-0.122341	-0.132498	-0.206753	1.01346	-0.363809	-0.360507	-0.734749	0.354721	-0.337809	0.456487	0.554657	0.564547	-0.368294	-0.438719	-0.252355	0.686553	-0.0157607	-0.477282	0	-0.346438	0.454242	0.593222	0.956617	0.488748	0.208105	0.129128	0.919675	0.229623	0.966187	0.591419	0.70536	-0.44414	-0.537536	0.0548602	0.0465838	0.158206
100	DDMN	0.332002	0.354992	-0.0747452	0.221474	0.135054	0.212386	0.0775075	0.16585	0.26318	-0.209785	-0.239838	0.218024	-0.0063328	0.35862	0.216709	-0.439239	0.622797	0.307414	0.260197	-0.0826139	0.445788	0.105573	-0.468708	-0.233602	0.236734	0.731848	0.0565726	-0.338619	0.321024	0.243233	-0.346438	0	-0.323506	-0.312966	0.0434738	-0.0466398	0.00134297	0.222369	-0.0652902	0.199274	-0.252579	-0.0432921	-0.321526	0.416908	0.316069	-0.156579	-0.11853	0.105794
68	PSN	0.0993162	-0.0135116	0.117525	0.227647	-0.0763025	0.0425514	0.0255753	-0.0343892	-0.110815	-0.195455	0.125056	-0.211438	-0.00400738	-0.100546	0.0636548	0.271489	-0.0750985	0.0265125	0.129183	0.432586	0.0416688	-0.0416963	0.292241	0.190446	-0.185287	-0.281222	-0.134768	0.119661	-0.529057	-0.28698	0.454242	-0.323506	0	0.316815	0.174977	-0.12344	-0.101084	-0.113027	0.32077	-0.308534	0.0697072	-0.0942943	0.165394	-0.176387	-0.11986	0.12831	0.2122	-0.0706464
82	PCN	0.179525	-0.205113	-0.375281	0.21865	0.000463043	-0.0390043	-0.377497	-0.137207	-0.516572	-0.00656767	0.33196	0.217231	-0.116453	-0.140492	-0.046832	0.788804	-0.348494	-0.226052	-0.514917	0.0697372	-0.20656	0.490149	0.323406	0.483559	-0.0700567	0.021597	-0.282964	0.481133	0.448409	-0.211777	0.593222	-0.312966	0.316815	0	0.253088	0.432323	0.314271	0.120496	0.434921	0.336303	0.567782	0.254322	0.394548	-0.332018	-0.355888	0.162585	-0.104756	0.063225
43	PCN	0.261267	-0.133341	-0.346849	-0.0230214	-0.151665	0.109429	-0.270248	0.135655	-0.564013	-0.0650993	-0.105614	-0.118212	-0.21568	0.0515705	-0.228743	0.615673	0.11403	-0.428681	-0.556026	0.0738758	-0.132516	0.307224	0.429483	0.44322	-0.0766096	-0.0361816	0.142462	0.566502	0.244418	-0.332611	0.956617	0.0434738	0.174977	0.253088	0	0.519573	0.000182806	0.658116	0.958458	0.602905	1.09546	1.03946	0.543987	-0.245782	-0.29897	-0.0825605	-0.0567423	0.423713
78	PVN	0.0724872	-0.308303	-0.665349	-0.142684	0.0962179	0.0355527	-0.40347	-0.118114	-0.775798	0.0214073	0.429439	0.289347	-0.0278366	-0.140761	-0.181953	0.779222	-0.387275	-0.394013	-0.5614	0.350715	-0.383936	0.350262	0.201561	0.333914	-0.0997983	-0.285732	-0.443602	0.592524	0.185382	-0.354201	0.488748	-0.0466398	-0.12344	0.432323	0.519573	0	0.596269	-0.00456928	0.332665	0.653728	0.980145	0.586419	0.792928	-0.477594	-0.683916	-0.00612603	0.0652888	0.0759797
53	VDMN	-0.200887	-0.254986	-0.464942	-0.196566	-0.135433	-0.203146	-0.294362	-0.354327	-0.241017	0.0664373	0.562211	0.406345	-0.229798	-0.23925	-0.0394059	0.378861	-0.301658	-0.215954	-0.176745	0.0944163	-0.217124	0.151713	0.180966	0.0378167	-0.24677	-0.173755	-0.316941	0.410927	0.139581	-0.319764	0.208105	0.00134297	-0.101084	0.314271	0.000182806	0.596269	0	-0.121462	0.0625988	0.32248	0.355658	0.167603	0.220416	-0.129042	-0.505093	-0.00715739	-0.0628399	-0.185036
58	VDMN	0.55257	0.310196	0.0619821	0.305937	-0.0264254	0.257045	-0.13781	0.33693	-0.198271	-0.108845	-0.586544	0.132935	-0.0439977	0.283465	0.20401	-0.0255735	0.277362	-0.0567245	0.0356569	-0.447312	-0.0691383	0.285907	0.0615219	-0.0458189	0.321078	0.256107	0.166011	0.0931189	0.465355	0.115635	0.129128	0.222369	-0.113027	0.120496	0.658116	-0.00456928	-0.121462	0	0.310406	0.26253	0.197036	0.499286	-0.0111311	-0.0327516	0.184844	-0.137879	0.0330622	0.34925
76	VDMN	0.128697	-0.284822	-0.410907	-0.0569242	-0.163739	0.163247	-0.474692	0.0493844	-0.674648	-0.0843529	0.135864	-0.228413	-0.309952	-0.236536	-0.197324	0.739454	-0.208793	-0.376477	-0.727764	0.237759	-0.183366	0.418027	0.412707	0.874696	-0.120065	-0.107942	0.0549901	0.648128	0.156965	-0.375151	0.919675	-0.0652902	0.32077	0.434921	0.958458	0.332665	0.0625988	0.310406	0	0.289486	0.796227	0.549675	0.591489	-0.45369	-0.653502	0.154657	-0.232629	0.569484
71	VDMN	0.160579	0.000909095	-0.426727	-0.00931914	0.332121	0.14257	-0.246688	-0.0615873	-0.269895	-0.0921609	0.150183	0.130517	0.0491685	0.130008	-0.165163	0.174612	0.145759	-0.370001	-0.322434	0.0662547	0.0562076	0.305193	0.249126	0.261214	0.164289	0.259868	0.103436	0.421157	0.636468	-0.234921	0.229623	0.199274	-0.308534	0.336303	0.602905	0.653728	0.32248	0.26253	0.289486	0	0.756126	0.695697	0.34621	-0.190339	-0.236207	-0.259623	-0.154154	0.398643
65	VDMN	-0.0664127	-0.456698	-0.737341	-0.236399	-0.135226	-0.0177032	-0.619041	-0.0956295	-0.96523	0.0816241	0.341463	-0.0634495	-0.0816435	-0.253068	-0.49775	1.08099	-0.350553	-0.819652	-0.930599	0.313782	-0.383006	0.374644	0.480914	0.758115	-0.145018	-0.232341	-0.137985	1.09487	0.228518	-0.50267	0.966187	-0.252579	0.0697072	0.567782	1.09546	0.980145	0.355658	0.197036	0.796227	0.756126	0	0.930657	1.02303	-0.518072	-0.782953	-0.04793	-0.143118	0.287121
17	VDMN	0.157477	-0.0645172	-0.339471	0.0312476	-0.230164	-0.0152262	-0.469859	0.16363	-0.45009	-0.121623	-0.0216226	0.182935	-0.221668	0.149377	-0.0356232	0.599817	-0.116404	-0.437067	-0.577752	-0.064896	-0.153836	0.352067	0.500377	0.523507	0.038238	0.0060613	0.128405	0.527223	0.576545	-0.121701	0.591419	-0.0432921	-0.0942943	0.254322	1.03946	0.586419	0.167603	0.499286	0.549675	0.695697	0.930657	0	0.457863	-0.193821	-0.312871	-0.103871	-0.083315	0.362747
67	RECN	-0.207798	-0.54788	-0.521363	-0.418934	-0.188278	-0.121133	-0.584538	-0.144864	-0.904838	-0.0527018	0.469275	-0.217015	-0.225924	-0.387557	-0.479273	0.971141	-0.428768	-0.594827	-0.731842	0.499414	-0.491117	0.265521	0.549358	0.720291	-0.301925	-0.336853	-0.000463394	0.744417	0.0149908	-0.41179	0.70536	-0.321526	0.165394	0.394548	0.543987	0.792928	0.220416	-0.0111311	0.591489	0.34621	1.02303	0.457863	0	-0.634164	-0.878389	-0.0806377	-0.208975	0.493229
30	RECN	0.391826	0.581071	0.568175	0.459025	0.241161	0.282342	0.59777	0.209946	0.746448	-0.279398	-0.139369	0.164239	0.125445	0.471997	0.596605	-0.628828	0.43178	0.645716	0.660854	-0.149063	0.790546	-0.117301	-0.326601	-0.437542	0.136989	0.571153	0.0206939	-0.451241	0.0978349	0.776806	-0.44414	0.416908	-0.176387	-0.332018	-0.245782	-0.477594	-0.129042	-0.0327516	-0.45369	-0.190339	-0.518072	-0.193821	-0.634164	0	0.872729	0.141945	0.310849	-0.311649
32	RECN	0.529765	0.724271	0.823785	0.667883	0.185842	0.279795	0.698498	0.365479	0.806297	-0.318952	-0.521115	0.0709732	0.378044	0.706351	0.733103	-0.719728	0.558851	0.84018	0.775527	-0.315955	0.693619	-0.160497	-0.305186	-0.554152	0.217662	0.528031	0.240769	-0.815032	0.0450453	0.818394	-0.537536	0.316069	-0.11986	-0.355888	-0.29897	-0.683916	-0.505093	0.184844	-0.653502	-0.236207	-0.782953	-0.312871	-0.878389	0.872729	0	0.0347052	0.364965	-0.28031
88	RECN	-0.0340522	-0.0461688	0.139653	0.117292	-0.0301108	-0.147008	0.22778	0.13806	0.0961309	0.00119623	0.000493285	0.160439	0.116333	-0.0592059	0.229401	0.0117652	-0.0938095	0.321206	0.00703445	0.185752	0.217043	0.089828	0.0910956	0.367523	0.0598111	0.167707	-0.00590904	0.0788927	0.1162	0.233553	0.0548602	-0.156579	0.12831	0.162585	-0.0825605	-0.00612603	-0.00715739	-0.137879	0.154657	-0.259623	-0.04793	-0.103871	-0.0806377	0.141945	0.0347052	0	0.0535509	-0.212392
37	RECN	0.648936	0.48726	0.407175	0.736819	0.0537532	0.437741	0.700782	0.297754	0.199675	0.0828935	0.0503989	0.488765	0.193316	0.242923	0.552393	-0.126531	0.103451	0.448261	0.356051	-0.0420139	0.169536	0.0226629	0.00168611	-0.483142	0.054761	-0.000184359	-0.281898	-0.418688	-0.254253	0.0847258	0.0465838	-0.11853	0.2122	-0.104756	-0.0567423	0.0652888	-0.0628399	0.0330622	-0.232629	-0.154154	-0.143118	-0.083315	-0.208975	0.310849	0.364965	0.0535509	0	-0.264334
51	SMN	0.10988	-0.0734452	-0.168353	-0.089379	0.0414595	0.0515385	-0.300684	0.178149	-0.410642	0.088089	0.0227877	-0.189946	-0.265867	-0.128985	-0.201106	0.237388	-0.141678	-0.255607	-0.374307	0.00519727	-0.182945	0.0910281	0.132245	0.372195	0.160967	0.0862244	0.525701	0.235974	0.124407	-0.0458135	0.158206	0.105794	-0.0706464	0.063225	0.423713	0.0759797	-0.185036	0.34925	0.569484	0.398643	0.287121	0.362747	0.493229	-0.311649	-0.28031	-0.212392	-0.264334	0
14	SMN	0.631433	0.541044	0.202742	0.507453	0.202445	0.417682	0.33192	0.21686	0.242101	-0.512508	-0.162405	0.250923	0.254567	0.678443	0.364	-0.241668	0.562109	0.445712	0.211478	-0.173274	0.461899	0.26957	-0.185568	-0.354212	0.0819634	0.504151	0.213839	-0.408544	0.265151	0.283933	-0.0981815	0.393296	-0.0985949	-0.123554	0.341978	0.0876541	-0.126236	0.352055	-0.0236348	0.268107	-0.0165776	0.187501	-0.0821416	0.308484	0.45544	-0.082758	0.240803	-0.224337
12	SMN	-0.160732	0.114312	0.124409	0.0305935	0.474012	0.0628199	0.0119316	0.0708413	0.233034	-0.340901	0.075206	-0.153463	0.570504	0.15874	0.0598519	-0.106765	0.207573	0.187121	0.143844	0.0458764	0.158254	-0.149829	-0.138438	-0.141618	0.190044	0.217069	0.139182	-0.21662	-0.038717	0.184879	-0.327655	0.0698017	0.103301	-0.0713738	-0.350522	-0.0660759	-0.00976205	-0.173027	-0.308813	-0.00222163	-0.252102	-0.169182	-0.145793	0.19581	0.247896	-0.161916	-0.128424	-0.129644
50	SMN	-0.251646	-0.473288	-0.708288	-0.504151	-0.140812	-0.256303	-0.750378	-0.0984159	-0.657668	0.0731363	0.158962	-0.272727	-0.1949	-0.420329	-0.478333	0.654949	-0.319156	-0.753855	-0.837534	0.206643	-0.574638	0.0997566	0.424373	0.780114	-0.0535793	-0.209089	0.23377	0.685439	0.0880969	-0.26447	0.451267	-0.271016	0.0711353	0.281743	0.404726	0.714579	0.212648	0.126996	0.407853	0.48163	0.858866	0.551649	1.03156	-0.6416	-0.696146	-0.0891396	-0.351229	0.486501
	name of IC	26	91	66	64	25	86	44	29	23	7	40	60	49	33	5	70	57	46	21	34	35	79	87	59	20	22	72	42	31	73	80	100	68	82	43	78	53	58	76	71	65	17	67	30	32	88	37	51
	name of ICN	ASN	ASN	ASN	ASN	AUN	AUN	AUN	AGN	AGN	AGN	HVN	HVN	VSN	VSN	VSN	VSN	LGN	LGN	LGN	LGN	LGN	LECN	LECN	LECN	DDMN	DDMN	DDMN	DDMN	DDMN	DDMN	DDMN	DDMN	PSN	PCN	PCN	PVN	VDMN	VDMN	VDMN	VDMN	VDMN	VDMN	RECN	RECN	RECN	RECN	RECN	SMN
[truncated: 3 more columns]

## Sheet: real-post-State1
name of IC	name of ICN	correlations
26	ASN	0	0.246424	0.253189	0.369219	0.0462643	0.608764	0.139702	0.180057	-0.176278	0.113862	-0.123163	0.160744	0.301416	0.0132848	0.0844322	0.211602	0.197426	0.411182	-0.122309	0.120952	-0.0756791	-0.121891	-0.0333448	-0.175109	0.000553176	0.106319	0.148356	-0.256221	-0.0619014	-0.241532	-0.0757935	0.114173	0.0233715	0.267945	0.0303515	0.149086	0.00436712	0.295717	0.182274	0.190419	0.13135	0.13283	0.372575	0.0683487	0.173812	-0.191662	0.155457	0.00888517
91	ASN	0.246424	0	0.139527	0.348021	-0.0514851	0.0379377	0.04701	0.328337	0.246166	-0.122402	0.0658204	0.186968	-0.0710994	0.136197	-0.00290376	0.0902337	0.221933	0.0855005	0.394745	0.242976	0.155548	0.0733529	-0.236107	-0.0709331	0.346392	0.308791	0.000518296	-0.202076	0.159061	0.134747	0.210525	0.119113	-0.0434083	-0.0659262	-0.040131	-0.0321425	-0.0254543	0.149081	0.0767967	-0.074255	0.0936299	0.071839	-0.154483	0.233241	0.122502	-0.264226	0.017771	-0.30086
66	ASN	0.253189	0.139527	0	-0.117352	-0.024058	-0.0993492	-0.163361	-0.0583303	0.0232199	0.105969	-0.192203	-0.0579239	0.223753	0.124165	-0.156704	-0.0802849	0.0716695	-0.131252	-0.133583	0.0125832	0.0148358	-0.137682	0.0354814	-0.0640965	-0.189197	-0.144944	-0.0891248	-0.0896988	-0.113046	0.197011	-0.165768	-0.214545	0.16416	-0.0157163	-0.225726	-0.278913	-0.101171	-0.0629507	-0.197096	-0.0371497	-0.346459	-0.0844916	-0.0909115	0.187395	-0.0469332	-0.0990457	0.0154131	-0.00461736
64	ASN	0.369219	0.348021	-0.117352	0	-0.109077	0.21301	0.170988	0.31569	0.00504663	0.021235	-0.0581171	-0.116069	-0.145405	-0.330541	0.308201	0.252944	-0.181912	0.204216	0.292291	-0.0935591	0.322588	-0.0241367	0.0556678	-0.0969517	0.304254	0.214504	-0.0298842	-0.0295214	0.103698	0.00128974	0.311617	0.202323	0.221071	0.172893	0.279461	0.191305	0.344658	0.165606	0.329225	-0.0633088	0.132823	-0.0529115	0.100271	0.121129	0.491115	0.253831	0.26643	-0.0722858
25	AUN	0.0462643	-0.0514851	-0.024058	-0.109077	0	0.367979	0.366208	-0.0234915	-0.0494847	0.00212392	0.0165756	0.0498025	0.195489	-0.107911	-0.0762974	-0.214436	0.0404784	0.128999	0.0190191	-0.0745291	-0.0423939	-0.290659	-0.0730789	-0.221603	0.0400833	-0.01991	0.0766129	-0.0367116	-0.182304	-0.217718	-0.176451	-0.0597353	0.0466916	-0.00467902	-0.0602847	-0.113837	-0.0285676	-0.120047	0.0409105	0.0739502	-0.168739	-0.0792715	0.0462166	-0.176082	-0.205249	-0.241499	-0.0957535	0.134216
86	AUN	0.608764	0.0379377	-0.0993492	0.21301	0.367979	0	0.487294	0.169659	-0.285683	-0.0365918	-0.062329	0.267097	0.515319	0.107338	0.2424	0.193269	0.257347	0.463608	0.0709393	0.0672322	-0.0912574	-0.0876895	0.00337	-0.0774605	-0.0600827	0.0937582	0.361934	-0.343828	-0.0417818	-0.384649	-0.0203326	0.211515	0.0288366	0.202391	0.217224	0.264529	0.119678	0.314184	0.2214	0.463152	0.222813	0.170867	0.451813	-0.0289357	0.106354	-0.184264	0.096126	0.029037
44	AUN	0.139702	0.04701	-0.163361	0.170988	0.366208	0.487294	0	0.11685	-0.019358	-0.00280962	-0.0135464	0.0682988	0.114415	-0.256997	0.0395811	0.00694651	0.0161324	0.0374375	0.222329	-0.200672	0.0272295	-0.233131	-0.256445	-0.172745	0.283858	-0.0855479	-0.0706876	-0.180288	-0.219625	-0.505142	0.183217	-0.139429	0.139051	0.119776	0.0201756	0.115186	0.306934	-0.175695	0.0620479	-0.117724	0.11745	-0.0899279	0.0868939	-0.239276	0.0187598	-0.243259	0.111343	-0.0594625
29	AGN	0.180057	0.328337	-0.0583303	0.31569	-0.0234915	0.169659	0.11685	0	-0.0450558	0.226211	-0.102645	0.103653	-0.0815237	-0.0351013	0.0338188	0.0987664	0.0502993	0.00588363	0.0635814	-0.0192861	-0.0284501	-0.0770006	0.0240219	-0.0543946	0.256588	0.174445	0.284692	-0.265073	0.0635732	-0.0869871	0.0105605	0.0879082	-0.0386741	-0.0739567	0.118133	0.0869641	0.131331	0.141571	0.168716	0.0806	0.111704	0.139185	0.0544231	0.0582128	0.13507	-0.0914418	0.0753129	-0.00243213
23	AGN	-0.176278	0.246166	0.0232199	0.00504663	-0.0494847	-0.285683	-0.019358	-0.0450558	0	0.059583	-0.0147025	-0.0673492	-0.171316	-0.0710686	0.0757758	-0.145167	-0.177158	-0.164812	0.0894361	-0.201596	0.0452161	0.024763	-0.209415	0.0103074	0.108407	-0.0208488	0.035318	0.0390546	0.105819	0.222034	-0.0446739	-0.220273	-0.102782	-0.00129363	-0.263006	-0.328979	0.0738084	0.00882386	-0.201535	-0.177821	-0.195401	-0.171366	-0.438602	0.079263	0.100282	0.0243504	0.0874227	-0.130565
7	AGN	0.113862	-0.122402	0.105969	0.021235	0.00212392	-0.0365918	-0.00280962	0.226211	0.059583	0	-0.18505	-0.136394	-0.181527	-0.214453	-0.223083	-0.0428734	-0.127918	-0.207671	-0.347536	-0.135834	-0.0176953	-0.190063	-0.208289	-0.0209646	0.0706956	-0.261551	0.225851	0.189773	0.0224711	-0.140142	-0.0552199	-0.1758	-0.0436298	0.0434387	-0.00317519	-0.110817	0.0040881	0.017275	-0.0980725	-0.050205	-0.0276516	-0.193875	0.082001	0.0872616	-0.0236087	-0.00692041	0.0934763	0.168879
40	HVN	-0.123163	0.0658204	-0.192203	-0.0581171	0.0165756	-0.062329	-0.0135464	-0.102645	-0.0147025	-0.18505	0	0.678391	0.036551	-0.140758	-0.125108	0.0443119	-0.0373319	0.0657408	-0.115916	0.0714477	0.0111955	-0.052212	-0.0255079	0.00161109	0.0299597	0.104612	-0.144663	-0.0965413	0.0491323	-0.113741	0.0260972	0.10057	-0.174997	-0.164362	-0.00315373	0.153403	-0.104025	-0.183905	0.0615227	-0.0770091	0.146921	0.0360845	-0.000169908	-0.2615	-0.0849874	-0.0579339	-0.0311982	0.0250734
60	HVN	0.160744	0.186968	-0.0579239	-0.116069	0.0498025	0.267097	0.0682988	0.103653	-0.0673492	-0.136394	0.678391	0	0.150974	0.116838	-0.0503012	0.0751407	0.203394	0.196584	-0.175206	0.140768	-0.118509	-0.0495168	-0.0150296	-0.0778298	-0.0674203	0.0594533	0.0706686	-0.375625	-0.037241	-0.38134	-0.00926176	0.0307362	-0.135925	-0.109167	0.00511493	0.1927	-0.220788	-0.00874681	0.109977	0.128572	0.143705	0.243675	0.15025	-0.274798	-0.202366	-0.382698	-0.142016	0.0129966
49	VSN	0.301416	-0.0710994	0.223753	-0.145405	0.195489	0.515319	0.114415	-0.0815237	-0.171316	-0.181527	0.036551	0.150974	0	0.28659	0.106733	0.112264	0.242941	0.131396	-0.148864	0.101885	-0.20845	0.156118	-0.00771583	-0.0282946	-0.265661	0.0422349	0.0517647	-0.249898	-0.0443607	-0.0905979	-0.148422	0.092593	0.0664219	0.0615872	-0.0511964	0.208076	-0.0239076	0.0251587	-0.0766019	0.226306	0.0405621	0.200131	0.150116	0.0178891	0.0217527	-0.161018	-0.0633438	-0.143437
33	VSN	0.0132848	0.136197	0.124165	-0.330541	-0.107911	0.107338	-0.256997	-0.0351013	-0.0710686	-0.214453	-0.140758	0.116838	0.28659	0	0.370135	0.178213	0.462485	0.115457	0.054052	0.216419	-0.213966	0.521689	0.258633	0.293461	-0.462986	-0.0426794	0.221831	-0.179288	0.078585	0.107778	-0.159223	-0.00390205	0.12926	-0.0999043	-0.0612651	0.0480058	-0.12721	0.189637	-0.209502	0.294958	0.145908	0.36864	0.00484836	0.307194	0.20071	-0.0441987	0.0488133	-0.156998
5	VSN	0.0844322	-0.00290376	-0.156704	0.308201	-0.0762974	0.2424	0.0395811	0.0338188	0.0757758	-0.223083	-0.125108	-0.0503012	0.106733	0.370135	0	0.357569	0.11091	0.378954	0.13184	-0.075796	-0.0283122	0.635844	0.229991	0.0896263	-0.154817	0.0346479	0.117772	-0.179762	0.108095	0.0247797	0.0870019	0.146161	0.132744	0.147247	0.270175	0.14038	0.37658	0.355129	0.158636	0.139561	0.108535	0.0580959	0.108492	0.135496	0.39493	0.194023	0.256461	-0.194985
70	VSN	0.211602	0.0902337	-0.0802849	0.252944	-0.214436	0.193269	0.00694651	0.0987664	-0.145167	-0.0428734	0.0443119	0.0751407	0.112264	0.178213	0.357569	0	-0.117143	0.101086	-0.130696	0.00624996	-0.0599402	0.367568	-0.073879	0.282538	-0.0633987	-0.161499	0.0385192	-0.158812	0.1576	-0.139545	0.12397	0.0618899	0.165477	0.304712	0.435468	0.250994	0.192703	0.312379	0.436035	0.0182232	0.550431	0.251544	0.148704	0.0304863	0.305525	0.108089	0.00408716	-0.23514
57	LGN	0.197426	0.221933	0.0716695	-0.181912	0.0404784	0.257347	0.0161324	0.0502993	-0.177158	-0.127918	-0.0373319	0.203394	0.242941	0.462485	0.11091	-0.117143	0	0.279127	-0.00814948	0.522836	0.00378286	0.145151	0.127865	0.132603	-0.117388	0.257825	0.225781	-0.281498	-0.140283	-0.118009	-0.0104457	0.286435	-0.0980509	-0.163746	0.00130266	0.153876	-0.0869548	0.104378	-0.0464258	0.308046	-0.0452546	0.326237	0.0932277	0.14761	-0.0276592	-0.280044	-0.0355103	-0.0771494
46	LGN	0.411182	0.0855005	-0.131252	0.204216	0.128999	0.463608	0.0374375	0.00588363	-0.164812	-0.207671	0.0657408	0.196584	0.131396	0.115457	0.378954	0.101086	0.279127	0	0.0426956	0.450466	0.23527	0.145443	0.0903535	0.0575882	0.00108892	0.379393	0.123903	-0.295604	0.133686	-0.129504	0.130617	0.408044	0.0686598	0.146057	0.174355	0.165176	0.0533493	0.0727405	0.37771	0.249889	0.127911	0.119444	0.246877	0.250139	0.203557	0.0798002	-0.0833947	-0.144389
21	LGN	-0.122309	0.394745	-0.133583	0.292291	0.0190191	0.0709393	0.222329	0.0635814	0.0894361	-0.347536	-0.115916	-0.175206	-0.148864	0.054052	0.13184	-0.130696	-0.00814948	0.0426956	0	0.083055	0.104466	0.0455596	-0.157726	-0.238527	0.300971	0.0239775	-0.194204	-0.00204969	-0.098141	0.100179	0.190834	0.0726963	0.314355	-0.172978	-0.164974	-0.00450319	-0.00956487	-0.199521	-0.22362	-0.385176	0.0137496	-0.0966015	-0.274894	0.250889	0.409492	-0.0585985	0.168337	-0.17792
34	LGN	0.120952	0.242976	0.0125832	-0.0935591	-0.0745291	0.0672322	-0.200672	-0.0192861	-0.201596	-0.135834	0.0714477	0.140768	0.101885	0.216419	-0.075796	0.00624996	0.522836	0.450466	0.083055	0	0.273097	0.150591	-0.156305	0.291003	0.041442	0.277054	-0.0385301	0.00184159	0.120104	0.036434	0.131955	0.36714	0.0496479	-0.0818983	0.121489	0.269126	-0.172979	0.000619422	0.219151	0.0811627	0.287142	0.241447	0.0255184	0.335657	-0.127662	0.104348	-0.139041	-0.107578
35	LGN	-0.0756791	0.155548	0.0148358	0.322588	-0.0423939	-0.0912574	0.0272295	-0.0284501	0.0452161	-0.0176953	0.0111955	-0.118509	-0.20845	-0.213966	-0.0283122	-0.0599402	0.00378286	0.23527	0.104466	0.273097	0	-0.0391445	-0.129896	0.286387	0.422173	0.363871	-0.0269069	0.257103	0.393695	0.181208	0.447426	0.19418	0.145608	0.16626	0.224989	0.00146484	0.0343408	-0.225466	0.331412	0.166101	0.360457	-0.0235483	-0.190158	0.257384	0.151076	0.372948	0.0625953	-0.211811
79	LECN	-0.121891	0.0733529	-0.137682	-0.0241367	-0.290659	-0.0876895	-0.233131	-0.0770006	0.024763	-0.190063	-0.052212	-0.0495168	0.156118	0.521689	0.635844	0.367568	0.145151	0.145443	0.0455596	0.150591	-0.0391445	0	0.194635	0.415932	-0.269521	0.0633121	0.00810245	0.00379703	0.343281	0.276341	0.00272919	0.0549364	0.0556284	0.0715773	0.143194	0.171138	-0.0146003	0.115862	0.0362716	0.120696	0.183284	0.19211	0.06658	0.297266	0.20567	0.299168	0.0136863	-0.145379
87	LECN	-0.0333448	-0.236107	0.0354814	0.0556678	-0.0730789	0.00337	-0.256445	0.0240219	-0.209415	-0.208289	-0.0255079	-0.0150296	-0.00771583	0.258633	0.229991	-0.073879	0.127865	0.0903535	-0.157726	-0.156305	-0.129896	0.194635	0	0.142499	-0.238085	0.0898217	0.252957	0.0112733	0.0117091	0.134215	-0.132991	0.0136949	-0.17442	0.0261163	0.39068	0.223802	0.0598862	0.224597	0.118055	0.405933	0.0564235	0.335142	0.403913	0.00788392	-0.0956205	0.321211	0.218419	0.150009
59	LECN	-0.175109	-0.0709331	-0.0640965	-0.0969517	-0.221603	-0.0774605	-0.172745	-0.0543946	0.0103074	-0.0209646	0.00161109	-0.0778298	-0.0282946	0.293461	0.0896263	0.282538	0.132603	0.0575882	-0.238527	0.291003	0.286387	0.415932	0.142499	0	0.122833	0.184984	0.211717	0.184639	0.723255	0.408211	0.38854	0.145406	0.00661553	0.383526	0.476213	0.0268769	0.0250382	-0.00938797	0.49278	0.237303	0.506792	0.266075	-0.071503	0.265203	0.0894476	0.590922	0.00211074	-0.240356
20	DDMN	0.000553176	0.346392	-0.189197	0.304254	0.0400833	-0.0600827	0.283858	0.256588	0.108407	0.0706956	0.0299597	-0.0674203	-0.265661	-0.462986	-0.154817	-0.0633987	-0.117388	0.00108892	0.300971	0.041442	0.422173	-0.269521	-0.238085	0.122833	0	0.376767	-0.129767	0.0957455	0.330675	0.149605	0.437311	0.250589	0.103424	0.176524	0.12401	0.0232911	0.15179	-0.273027	0.210535	-0.0757579	0.2233	-0.244734	-0.202417	-0.00993404	0.144588	0.133119	0.0680696	-0.181226
22	DDMN	0.106319	0.308791	-0.144944	0.214504	-0.01991	0.0937582	-0.0855479	0.174445	-0.0208488	-0.261551	0.104612	0.0594533	0.0422349	-0.0426794	0.0346479	-0.161499	0.257825	0.379393	0.0239775	0.277054	0.363871	0.0633121	0.0898217	0.184984	0.376767	0	0.0927936	0.016415	0.492729	0.396363	0.187177	0.586543	-0.228289	0.128883	0.270452	0.0842683	0.0543988	-0.00823887	0.353824	0.258632	0.163953	0.107229	-0.0280597	0.100074	0.0920293	0.242799	-0.130101	-0.0246176
72	DDMN	0.148356	0.000518296	-0.0891248	-0.0298842	0.0766129	0.361934	-0.0706876	0.284692	0.035318	0.225851	-0.144663	0.0706686	0.0517647	0.221831	0.117772	0.0385192	0.225781	0.123903	-0.194204	-0.0385301	-0.0269069	0.00810245	0.252957	0.211717	-0.129767	0.0927936	0	0.0099833	0.188123	-0.136758	-0.081893	0.120992	-0.210897	0.0325585	0.228056	0.0927609	0.0094168	0.237546	0.101805	0.602983	0.118265	0.15764	0.271798	0.120347	-0.0713127	-0.0674605	-0.0285951	0.383698
42	DDMN	-0.256221	-0.202076	-0.0896988	-0.0295214	-0.0367116	-0.343828	-0.180288	-0.265073	0.0390546	0.189773	-0.0965413	-0.375625	-0.249898	-0.179288	-0.179762	-0.158812	-0.281498	-0.295604	-0.00204969	0.00184159	0.257103	0.00379703	0.0112733	0.184639	0.0957455	0.016415	0.0099833	0	0.292792	0.365743	0.304558	-0.182353	-0.0717879	0.199383	0.135207	-0.173408	0.0350608	-0.135668	0.0570776	0.0562096	0.260848	-0.0380824	-0.0926678	0.106792	-0.143486	0.375211	-0.164354	0.0463383
31	DDMN	-0.0619014	0.159061	-0.113046	0.103698	-0.182304	-0.0417818	-0.219625	0.0635732	0.105819	0.0224711	0.0491323	-0.037241	-0.0443607	0.078585	0.108095	0.1576	-0.140283	0.133686	-0.098141	0.120104	0.393695	0.343281	0.0117091	0.723255	0.330675	0.492729	0.188123	0.292792	0	0.445993	0.382086	0.261246	-0.058701	0.253806	0.477716	0.0508075	-0.0141325	-0.0925637	0.420096	0.29165	0.561342	0.171036	-0.03306	0.335427	0.173907	0.531958	-0.0391521	-0.162384
73	DDMN	-0.241532	0.134747	0.197011	0.00128974	-0.217718	-0.384649	-0.505142	-0.0869871	0.222034	-0.140142	-0.113741	-0.38134	-0.0905979	0.107778	0.0247797	-0.139545	-0.118009	-0.129504	0.100179	0.036434	0.181208	0.276341	0.134215	0.408211	0.149605	0.396363	-0.136758	0.365743	0.445993	0	0.019152	0.0372801	-0.0384075	-0.0214958	0.0475654	-0.244644	-0.0460083	-0.000983074	-0.0035056	-0.046328	0.0343515	0.0817893	-0.21346	0.363757	0.270625	0.573562	0.156018	-0.183962
80	DDMN	-0.0757935	0.210525	-0.165768	0.311617	-0.176451	-0.0203326	0.183217	0.0105605	-0.0446739	-0.0552199	0.0260972	-0.00926176	-0.148422	-0.159223	0.0870019	0.12397	-0.0104457	0.130617	0.190834	0.131955	0.447426	0.00272919	-0.132991	0.38854	0.437311	0.187177	-0.081893	0.304558	0.382086	0.019152	0	0.134016	0.143581	0.288365	0.411503	0.0441689	0.0610277	-0.236551	0.318265	-0.0530768	0.392277	-0.0061622	-0.226856	0.0919602	0.131892	0.262312	-0.0343139	-0.306779
100	DDMN	0.114173	0.119113	-0.214545	0.202323	-0.0597353	0.211515	-0.139429	0.0879082	-0.220273	-0.1758	0.10057	0.0307362	0.092593	-0.00390205	0.146161	0.0618899	0.286435	0.408044	0.0726963	0.36714	0.19418	0.0549364	0.0136949	0.145406	0.250589	0.586543	0.120992	-0.182353	0.261246	0.0372801	0.134016	0	-0.0333658	0.011364	0.286585	0.178026	0.041694	0.101297	0.404864	0.290331	0.110665	-0.10599	0.116053	0.0803577	0.140917	0.193692	-0.0183143	0.0552974
68	PSN	0.0233715	-0.0434083	0.16416	0.221071	0.0466916	0.0288366	0.139051	-0.0386741	-0.102782	-0.0436298	-0.174997	-0.135925	0.0664219	0.12926	0.132744	0.165477	-0.0980509	0.0686598	0.314355	0.0496479	0.145608	0.0556284	-0.17442	0.00661553	0.103424	-0.228289	-0.210897	-0.0717879	-0.058701	-0.0384075	0.143581	-0.0333658	0	0.148999	-0.0675465	-0.0118848	-0.0181275	-0.194456	-0.112712	-0.253052	0.0223888	-0.0436063	-0.159363	0.0521792	0.319807	0.137842	0.226117	-0.186102
82	PCN	0.267945	-0.0659262	-0.0157163	0.172893	-0.00467902	0.202391	0.119776	-0.0739567	-0.00129363	0.0434387	-0.164362	-0.109167	0.0615872	-0.0999043	0.147247	0.304712	-0.163746	0.146057	-0.172978	-0.0818983	0.16626	0.0715773	0.0261163	0.383526	0.176524	0.128883	0.0325585	0.199383	0.253806	-0.0214958	0.288365	0.011364	0.148999	0	0.351911	-0.0294092	0.138647	-0.0448785	0.279814	0.325577	0.300322	-0.131956	0.11902	0.0489844	0.176226	0.139042	-0.0174421	-0.121696
43	PCN	0.0303515	-0.040131	-0.225726	0.279461	-0.0602847	0.217224	0.0201756	0.118133	-0.263006	-0.00317519	-0.00315373	0.00511493	-0.0511964	-0.0612651	0.270175	0.435468	0.00130266	0.174355	-0.164974	0.121489	0.224989	0.143194	0.39068	0.476213	0.12401	0.270452	0.228056	0.135207	0.477716	0.0475654	0.411503	0.286585	-0.0675465	0.351911	0	0.301355	0.189471	0.254268	0.661121	0.465782	0.63574	0.219749	0.251616	0.194581	0.127072	0.533998	0.147344	-0.0423802
78	PVN	0.149086	-0.0321425	-0.278913	0.191305	-0.113837	0.264529	0.115186	0.0869641	-0.328979	-0.110817	0.153403	0.1927	0.208076	0.0480058	0.14038	0.250994	0.153876	0.165176	-0.00450319	0.269126	0.00146484	0.171138	0.223802	0.0268769	0.0232911	0.0842683	0.0927609	-0.173408	0.0508075	-0.244644	0.0441689	0.178026	-0.0118848	-0.0294092	0.301355	0	0.160107	-0.0606638	0.142217	0.278033	0.365741	0.219215	0.411416	0.00107979	-0.0113632	0.129475	0.0358672	-0.12639
53	VDMN	0.00436712	-0.0254543	-0.101171	0.344658	-0.0285676	0.119678	0.306934	0.131331	0.0738084	0.0040881	-0.104025	-0.220788	-0.0239076	-0.12721	0.37658	0.192703	-0.0869548	0.0533493	-0.00956487	-0.172979	0.0343408	-0.0146003	0.0598862	0.0250382	0.15179	0.0543988	0.0094168	0.0350608	-0.0141325	-0.0460083	0.0610277	0.041694	-0.0181275	0.138647	0.189471	0.160107	0	0.0699662	0.0335784	-0.0228044	0.0281689	-0.0465341	0.0462265	0.051208	0.226013	0.128554	0.190274	-0.259197
58	VDMN	0.295717	0.149081	-0.0629507	0.165606	-0.120047	0.314184	-0.175695	0.141571	0.00882386	0.017275	-0.183905	-0.00874681	0.0251587	0.189637	0.355129	0.312379	0.104378	0.0727405	-0.199521	0.000619422	-0.225466	0.115862	0.224597	-0.00938797	-0.273027	-0.00823887	0.237546	-0.135668	-0.0925637	-0.000983074	-0.236551	0.101297	-0.194456	-0.0448785	0.254268	-0.0606638	0.0699662	0	0.369751	0.237798	0.0353415	0.16809	0.291291	0.0844679	0.109511	-0.0158193	0.103657	0.136021
76	VDMN	0.182274	0.0767967	-0.197096	0.329225	0.0409105	0.2214	0.0620479	0.168716	-0.201535	-0.0980725	0.0615227	0.109977	-0.0766019	-0.209502	0.158636	0.436035	-0.0464258	0.37771	-0.22362	0.219151	0.331412	0.0362716	0.118055	0.49278	0.210535	0.353824	0.101805	0.0570776	0.420096	-0.0035056	0.318265	0.404864	-0.112712	0.279814	0.661121	0.142217	0.0335784	0.369751	0	0.280969	0.430482	0.115522	0.268939	0.0189592	0.00423627	0.364427	-0.157273	0.0602164
71	VDMN	0.190419	-0.074255	-0.0371497	-0.0633088	0.0739502	0.463152	-0.117724	0.0806	-0.177821	-0.050205	-0.0770091	0.128572	0.226306	0.294958	0.139561	0.0182232	0.308046	0.249889	-0.385176	0.0811627	0.166101	0.120696	0.405933	0.237303	-0.0757579	0.258632	0.602983	0.0562096	0.29165	-0.046328	-0.0530768	0.290331	-0.253052	0.325577	0.465782	0.278033	-0.0228044	0.237798	0.280969	0	0.134827	0.27253	0.495587	0.156571	-0.126179	0.017931	-0.1157	0.115489
65	VDMN	0.13135	0.0936299	-0.346459	0.132823	-0.168739	0.222813	0.11745	0.111704	-0.195401	-0.0276516	0.146921	0.143705	0.0405621	0.145908	0.108535	0.550431	-0.0452546	0.127911	0.0137496	0.287142	0.360457	0.183284	0.0564235	0.506792	0.2233	0.163953	0.118265	0.260848	0.561342	0.0343515	0.392277	0.110665	0.0223888	0.300322	0.63574	0.365741	0.0281689	0.0353415	0.430482	0.134827	0	0.401035	0.133206	0.116722	0.107276	0.290193	0.0894248	-0.196689
17	VDMN	0.13283	0.071839	-0.0844916	-0.0529115	-0.0792715	0.170867	-0.0899279	0.139185	-0.171366	-0.193875	0.0360845	0.243675	0.200131	0.36864	0.0580959	0.251544	0.326237	0.119444	-0.0966015	0.241447	-0.0235483	0.19211	0.335142	0.266075	-0.244734	0.107229	0.15764	-0.0380824	0.171036	0.0817893	-0.0061622	-0.10599	-0.0436063	-0.131956	0.219749	0.219215	-0.0465341	0.16809	0.115522	0.27253	0.401035	0	0.113652	0.0807274	-0.0289066	0.0763677	0.0654551	-0.0606688
67	RECN	0.372575	-0.154483	-0.0909115	0.100271	0.0462166	0.451813	0.0868939	0.0544231	-0.438602	0.082001	-0.000169908	0.15025	0.150116	0.00484836	0.108492	0.148704	0.0932277	0.246877	-0.274894	0.0255184	-0.190158	0.06658	0.403913	-0.071503	-0.202417	-0.0280597	0.271798	-0.0926678	-0.03306	-0.21346	-0.226856	0.116053	-0.159363	0.11902	0.251616	0.411416	0.0462265	0.291291	0.268939	0.495587	0.133206	0.113652	0	0.00983887	-0.195934	0.0146139	0.0273129	0.289922
30	RECN	0.0683487	0.233241	0.187395	0.121129	-0.176082	-0.0289357	-0.239276	0.0582128	0.079263	0.0872616	-0.2615	-0.274798	0.0178891	0.307194	0.135496	0.0304863	0.14761	0.250139	0.250889	0.335657	0.257384	0.297266	0.00788392	0.265203	-0.00993404	0.100074	0.120347	0.106792	0.335427	0.363757	0.0919602	0.0803577	0.0521792	0.0489844	0.194581	0.00107979	0.051208	0.0844679	0.0189592	0.156571	0.116722	0.0807274	0.00983887	0	0.322773	0.393526	0.163583	-0.182992
32	RECN	0.173812	0.122502	-0.0469332	0.491115	-0.205249	0.106354	0.0187598	0.13507	0.100282	-0.0236087	-0.0849874	-0.202366	0.0217527	0.20071	0.39493	0.305525	-0.0276592	0.203557	0.409492	-0.127662	0.151076	0.20567	-0.0956205	0.0894476	0.144588	0.0920293	-0.0713127	-0.143486	0.173907	0.270625	0.131892	0.140917	0.319807	0.176226	0.127072	-0.0113632	0.226013	0.109511	0.00423627	-0.126179	0.107276	-0.0289066	-0.195934	0.322773	0	0.290916	0.371315	-0.0805087
88	RECN	-0.191662	-0.264226	-0.0990457	0.253831	-0.241499	-0.184264	-0.243259	-0.0914418	0.0243504	-0.00692041	-0.0579339	-0.382698	-0.161018	-0.0441987	0.194023	0.108089	-0.280044	0.0798002	-0.0585985	0.104348	0.372948	0.299168	0.321211	0.590922	0.133119	0.242799	-0.0674605	0.375211	0.531958	0.573562	0.262312	0.193692	0.137842	0.139042	0.533998	0.129475	0.128554	-0.0158193	0.364427	0.017931	0.290193	0.0763677	0.0146139	0.393526	0.290916	0	0.372211	-0.207899
37	RECN	0.155457	0.017771	0.0154131	0.26643	-0.0957535	0.096126	0.111343	0.0753129	0.0874227	0.0934763	-0.0311982	-0.142016	-0.0633438	0.0488133	0.256461	0.00408716	-0.0355103	-0.0833947	0.168337	-0.139041	0.0625953	0.0136863	0.218419	0.00211074	0.0680696	-0.130101	-0.0285951	-0.164354	-0.0391521	0.156018	-0.0343139	-0.0183143	0.226117	-0.0174421	0.147344	0.0358672	0.190274	0.103657	-0.157273	-0.1157	0.0894248	0.0654551	0.0273129	0.163583	0.371315	0.372211	0	-0.075701
51	SMN	0.00888517	-0.30086	-0.00461736	-0.0722858	0.134216	0.029037	-0.0594625	-0.00243213	-0.130565	0.168879	0.0250734	0.0129966	-0.143437	-0.156998	-0.194985	-0.23514	-0.0771494	-0.144389	-0.17792	-0.107578	-0.211811	-0.145379	0.150009	-0.240356	-0.181226	-0.0246176	0.383698	0.0463383	-0.162384	-0.183962	-0.306779	0.0552974	-0.186102	-0.121696	-0.0423802	-0.12639	-0.259197	0.136021	0.0602164	0.115489	-0.196689	-0.0606688	0.289922	-0.182992	-0.0805087	-0.207899	-0.075701	0
14	SMN	0.332604	-0.0388714	-0.15221	0.156429	-0.0279203	0.478427	0.182042	0.0178004	-0.198176	-0.121866	0.0669025	0.165339	0.301043	-0.105983	0.147858	0.337332	0.0182371	0.324948	-0.110219	0.101696	0.0476916	-0.0656442	-0.140161	-0.0245043	-0.0571892	0.171658	0.101284	-0.119635	0.0954891	-0.197461	0.0116626	0.248755	-0.119007	0.0242032	0.269688	0.275394	0.123369	0.146256	0.298981	0.209723	0.286734	0.138638	0.232568	-0.0628478	0.108391	-0.153203	-0.0266354	0.0321911
12	SMN	0.0884466	0.0345322	-0.20759	-0.10066	0.0848884	0.280546	0.2705	-0.0754006	-0.178726	-0.317355	0.0409392	0.159187	0.361607	0.0479558	0.173445	0.236603	0.201532	0.0226263	0.124794	0.109649	-0.0333185	0.0211265	-0.374597	-0.249735	0.0786183	0.123269	-0.093438	-0.195168	-0.168779	-0.255535	0.02102	0.130997	0.106257	0.0476592	-0.25491	0.202383	0.093769	-0.0188226	-0.1546	0.0516537	0.107462	0.191965	-0.143074	-0.244144	0.112952	-0.444239	-0.208091	-0.172798
50	SMN	0.129882	-0.120258	-0.173368	-0.0294047	0.233043	0.562857	0.0433695	0.170696	-0.348396	-0.101614	0.119788	0.188611	0.223254	0.169901	0.112852	-0.0116389	0.143246	0.119558	-0.146724	0.21002	-0.0243719	-0.0059764	0.337489	0.0112671	-0.0751081	0.212983	0.504939	-0.0545621	0.141276	-0.134183	-0.153406	0.133446	-0.236972	0.132198	0.384771	0.566736	-0.0439163	0.0121235	0.158674	0.693399	0.300413	0.314141	0.593655	0.0696921	-0.11611	-0.0657737	-0.0832463	0.241979
	name of IC	26	91	66	64	25	86	44	29	23	7	40	60	49	33	5	70	57	46	21	34	35	79	87	59	20	22	72	42	31	73	80	100	68	82	43	78	53	58	76	71	65	17	67	30	32	88	37	51
	name of ICN	ASN	ASN	ASN	ASN	AUN	AUN	AUN	AGN	AGN	AGN	HVN	HVN	VSN	VSN	VSN	VSN	LGN	LGN	LGN	LGN	LGN	LECN	LECN	LECN	DDMN	DDMN	DDMN	DDMN	DDMN	DDMN	DDMN	DDMN	PSN	PCN	PCN	PVN	VDMN	VDMN	VDMN	VDMN	VDMN	VDMN	RECN	RECN	RECN	RECN	RECN	SMN
[truncated: 3 more columns]

## Sheet: real-post-State2
name of IC	name of ICN	correlations
26	ASN	0	0.412568	0.125335	0.382479	-0.0430241	0.327155	0.333097	0.237346	-0.217948	0.326367	0.340179	0.290515	-0.0127779	0.0821355	0.0522101	0.126496	0.067223	-0.062692	0.319208	0.0777351	0.208831	-2.22645e-05	-0.0206227	-0.0221832	0.187495	-0.0441025	-0.0288678	-0.0920062	0.0929124	-0.0336986	0.217432	-0.0214694	0.165062	0.109514	-0.0276352	-0.0144152	0.0657892	0.190405	-0.00227333	0.102362	0.168754	0.133734	-0.199824	0.199724	0.0918882	-0.350617	0.281263	-0.177115
91	ASN	0.412568	0	0.0880115	0.376708	-0.0766398	0.2505	-0.0735512	0.32835	-0.110664	0.20529	0.285783	0.302845	-0.138579	0.00430175	-0.0185415	0.0701871	0.218231	0.0984307	0.266998	0.0943639	0.0137942	0.174365	-0.121524	0.150885	0.405487	0.137963	-0.00572616	0.00786163	0.254589	0.252945	0.154263	0.0944096	0.302257	0.177694	0.0585375	-0.0506967	0.0743107	0.357634	0.322927	0.0806441	0.0670168	0.141602	-0.115368	0.129839	-0.0989453	-0.0403014	-0.11296	-0.0770832
66	ASN	0.125335	0.0880115	0	-0.121048	0.0193668	0.120227	0.106712	0.00824985	-0.136347	-0.0855954	0.00386907	0.0801102	0.25598	0.0816422	-0.131155	0.00765281	0.0589437	-0.113794	-0.0583536	0.00676986	0.0903903	-0.108114	-0.124412	-0.140424	-0.184235	-0.0965523	-0.124344	-0.208223	-0.142138	-0.0386021	-0.180078	-0.0335065	0.0690677	-0.336854	-0.00122129	-0.0102082	-0.0890768	-0.141638	-0.201289	-0.002554	0.0586379	0.0944754	0.00647443	0.292437	-0.0776496	-0.224085	-0.0257296	-0.066761
64	ASN	0.382479	0.376708	-0.121048	0	0.011802	0.238224	-0.0153512	0.154515	-0.142868	0.211779	0.403838	0.211247	-0.226933	0.0142648	0.681531	0.290674	-0.203064	0.271832	0.399778	-0.186794	0.282641	0.0643887	-0.0665828	-0.0283347	0.174519	0.0625622	-0.016698	-0.0633249	0.106266	0.240843	0.194385	0.0158483	0.35986	0.25941	0.0505874	-0.0660986	0.240075	0.417655	0.251109	0.12527	0.115028	0.0668707	-0.136297	0.26539	0.418857	0.194549	0.245123	-0.110313
25	AUN	-0.0430241	-0.0766398	0.0193668	0.011802	0	0.274394	0.290626	-0.119049	0.153129	-0.0756132	-0.0176667	-0.214202	0.361353	0.0153017	-0.0293409	-0.150551	0.0240235	0.103248	0.142225	0.0631499	0.0976931	-0.101589	0.0340535	0.019461	0.12118	0.116802	0.217379	0.138889	-0.0706259	-0.00332823	0.066231	0.0625641	0.0827819	-0.0729228	0.0982483	0.178872	-0.0930512	-0.128692	-0.00875536	0.266737	0.161488	0.0184294	0.0820588	0.000146293	0.0334323	0.210096	-0.0743717	0.124713
86	AUN	0.327155	0.2505	0.120227	0.238224	0.274394	0	0.424137	0.0585291	-0.239652	-0.0117752	0.428119	0.443634	0.332929	0.0774233	0.102506	0.165142	0.127396	0.091491	0.248747	0.20465	0.16492	0.0176686	-0.0690757	0.00441757	0.113252	-0.0284959	0.0570638	0.182715	0.0117186	-0.110373	0.11732	0.0751656	0.189866	0.0827053	0.258029	0.283654	0.196837	0.184495	0.0442825	0.493219	0.38806	0.251656	-0.271023	0.194786	0.0568473	-0.0626821	0.164063	-0.177819
44	AUN	0.333097	-0.0735512	0.106712	-0.0153512	0.290626	0.424137	0	-0.00851935	-0.0609217	0.0629672	0.18625	0.134639	0.313453	0.039928	-0.00206952	-0.0180657	0.0973489	-0.084849	0.101125	0.106186	0.125337	-0.0304444	-0.0224275	-0.0947702	-0.117597	-0.188813	-0.0180542	-0.10612	-0.209586	-0.224253	0.12955	-0.0387737	0.0609551	-0.113917	0.0956242	0.189548	-0.0301665	-0.086189	-0.198727	0.147458	0.0932762	0.0987069	-0.22432	0.138684	0.116156	-0.344548	0.357607	-0.0856499
29	AGN	0.237346	0.32835	0.00824985	0.154515	-0.119049	0.0585291	-0.00851935	0	-0.162902	0.26055	0.0733258	0.188747	-0.118516	0.108872	0.0810986	0.0840721	0.131241	0.13526	0.102277	-0.0245406	-0.00633737	0.107954	-0.12441	0.109172	0.177128	0.120885	0.0415669	-0.0341391	0.262531	0.138832	0.0321406	0.0832324	-0.064352	0.207494	0.0261975	-0.0944956	0.106341	0.227165	0.147585	-0.0769573	0.142966	-0.0405233	-0.0653332	0.124711	0.0609397	0.0227387	0.057288	-0.115578
23	AGN	-0.217948	-0.110664	-0.136347	-0.142868	0.153129	-0.239652	-0.0609217	-0.162902	0	0.0465093	-0.21528	-0.264326	-0.0578902	0.0132351	-0.0328655	-0.29915	0.0520071	0.105202	0.0205379	-0.110337	-0.100941	0.0396519	0.0391329	-0.0250174	0.0959104	0.101364	0.0890387	-0.122274	-0.013221	0.0615883	-0.140694	0.0975447	-0.0261242	-0.0883937	-0.180161	-0.160501	-0.279957	-0.271916	-0.166291	-0.186309	-0.162234	-0.243577	0.140389	-0.119142	0.0439524	0.0936725	-0.0522954	0.0944306
7	AGN	0.326367	0.20529	-0.0855954	0.211779	-0.0756132	-0.0117752	0.0629672	0.26055	0.0465093	0	0.167	0.210423	-0.284119	-0.0984118	0.11768	0.0180383	0.0973903	-0.0888498	0.10474	-0.173559	0.0805065	0.0854379	0.0686167	0.0969831	0.11884	0.0352058	0.192252	0.0928064	0.248595	0.0299988	0.0612247	0.0516237	-0.0385624	0.128933	-0.234938	-0.232811	-0.0242624	0.178818	0.241291	-0.105887	0.00909905	0.0132004	-0.168531	-0.00387156	0.0593982	-0.0211272	0.0625106	0.128845
40	HVN	0.340179	0.285783	0.00386907	0.403838	-0.0176667	0.428119	0.18625	0.0733258	-0.21528	0.167	0	0.754445	0.142859	0.0938448	0.219996	0.361073	0.0538602	0.225129	-0.0471655	0.138093	-0.00179813	0.14787	-0.0597196	0.161796	0.148512	0.126292	-0.064097	0.174463	0.239108	0.0121235	0.14843	0.159057	0.125183	0.111518	0.201613	0.299744	0.368446	0.300671	0.216104	0.464368	0.368728	0.337034	-0.27943	0.238796	0.0949705	0.0953626	0.10383	-0.144792
60	HVN	0.290515	0.302845	0.0801102	0.211247	-0.214202	0.443634	0.134639	0.188747	-0.264326	0.210423	0.754445	0	0.00673164	0.350555	0.201815	0.352276	0.343341	0.296703	-0.0143816	0.229525	-0.0830924	0.379142	-0.101392	0.210956	0.0532284	0.121593	-0.127484	0.0615578	0.228354	0.138646	-0.0193813	0.141438	-0.0855593	0.171399	0.0771286	0.238858	0.426684	0.392058	0.17437	0.373358	0.286891	0.400149	-0.276187	0.388204	0.0132679	-0.0387169	0.0834197	-0.221529
49	VSN	-0.0127779	-0.138579	0.25598	-0.226933	0.361353	0.332929	0.313453	-0.118516	-0.0578902	-0.284119	0.142859	0.00673164	0	0.077077	-0.190716	0.0138895	-0.0188502	-0.035656	-0.129012	0.0886109	-0.0834903	-0.0824255	-0.0263737	-0.0841696	-0.0470547	0.0118012	-0.114976	0.107188	-0.119798	-0.173084	-0.0107422	0.00670148	0.0127982	-0.0859297	0.239045	0.274572	-0.0190898	-0.111757	-0.159395	0.277243	0.16417	0.0790866	-0.108032	0.169148	-0.0675975	-0.0431104	0.0157544	-0.0829152
33	VSN	0.0821355	0.00430175	0.0816422	0.0142648	0.0153017	0.0774233	0.039928	0.108872	0.0132351	-0.0984118	0.0938448	0.350555	0.077077	0	0.375697	0.49007	0.351906	0.2043	0.0738871	0.362558	-0.0822992	0.475891	-0.035612	0.379375	-0.313628	-0.185147	-0.0444619	0.0678804	-0.0364186	0.461002	-0.0924063	-0.107333	-0.203506	0.0557375	-0.249395	-0.0408853	0.0375622	0.291233	-0.0634937	0.120013	0.147879	-0.0646468	-0.0252881	0.450496	0.411976	-0.0624201	0.153186	-0.231406
5	VSN	0.0522101	-0.0185415	-0.131155	0.681531	-0.0293409	0.102506	-0.00206952	0.0810986	-0.0328655	0.11768	0.219996	0.201815	-0.190716	0.375697	0	0.513778	-0.115463	0.372099	0.252324	-0.11204	-0.00380813	0.504024	-0.0793328	0.139439	-0.0803545	-0.142675	-0.00697094	-0.0815774	0.0408217	0.486287	0.0432476	0.0158695	0.030434	0.272758	-0.239292	-0.278178	0.192076	0.401904	0.144071	0.029365	0.041777	-0.150072	0.0161312	0.379578	0.703238	0.301502	0.408618	-0.0885671
70	VSN	0.126496	0.0701871	0.00765281	0.290674	-0.150551	0.165142	-0.0180657	0.0840721	-0.29915	0.0180383	0.361073	0.352276	0.0138895	0.49007	0.513778	0	-0.0182309	0.0275474	-0.0233066	0.10122	0.0190616	0.304161	-0.0810679	0.239647	-0.272304	-0.336426	-0.158814	0.211238	0.143905	0.221265	0.189464	-0.235028	-0.198432	0.198149	-0.0609415	0.0589265	0.464859	0.575886	0.292859	0.114175	0.409566	0.0877254	-0.0948221	0.380546	0.367594	0.0871217	0.182057	-0.326195
57	LGN	0.067223	0.218231	0.0589437	-0.203064	0.0240235	0.127396	0.0973489	0.131241	0.0520071	0.0973903	0.0538602	0.343341	-0.0188502	0.351906	-0.115463	-0.0182309	0	0.373836	0.0646262	0.634416	-0.00829617	0.304008	-0.027803	0.209571	0.00903431	0.253506	0.0568451	-0.0494071	0.0402518	0.147041	-0.11359	0.320301	0.109262	-0.00217587	0.0652692	0.0659591	0.0137859	0.051246	0.00462413	0.201788	0.116461	0.0943819	-0.066702	0.233123	0.0794687	-0.0289389	-0.0480629	0.0200678
46	LGN	-0.062692	0.0984307	-0.113794	0.271832	0.103248	0.091491	-0.084849	0.13526	0.105202	-0.0888498	0.225129	0.296703	-0.035656	0.2043	0.372099	0.0275474	0.373836	0	-0.00557537	0.373818	0.0449281	0.502808	-0.0886651	0.267957	0.221504	0.622993	0.00280038	-0.0447128	0.322272	0.427687	-0.0853271	0.600484	0.103541	0.3174	0.0808631	-0.0205149	0.0926093	0.0375535	0.245046	0.168701	0.000220711	-0.136748	0.0717556	0.3113	0.290478	0.599823	-0.0223738	-0.0636817
21	LGN	0.319208	0.266998	-0.0583536	0.399778	0.142225	0.248747	0.101125	0.102277	0.0205379	0.10474	-0.0471655	-0.0143816	-0.129012	0.0738871	0.252324	-0.0233066	0.0646262	-0.00557537	0	-0.0318292	0.0779893	-0.130496	-0.236081	-0.240473	0.212665	-0.194917	0.178056	-0.177632	-0.253738	0.0739259	0.00978969	0.0436843	0.378905	-0.0171326	-0.0809044	-0.0954996	-0.117952	0.17006	-0.133039	-0.0137626	-0.0781816	-0.179696	-0.0552638	0.204966	0.280631	-0.198023	0.289348	0.113465
34	LGN	0.0777351	0.0943639	0.00676986	-0.186794	0.0631499	0.20465	0.106186	-0.0245406	-0.110337	-0.173559	0.138093	0.229525	0.0886109	0.362558	-0.11204	0.10122	0.634416	0.373818	-0.0318292	0	0.188852	0.249678	-0.0625318	0.300865	-0.0859985	0.155473	-0.0202654	0.0854801	0.146425	0.129684	0.0761071	0.196012	0.100357	0.0262201	0.14178	0.200243	0.0289304	0.047894	0.121364	0.224345	0.137268	0.0926273	-0.00245433	0.259128	0.0141918	-0.00757632	-0.0903004	-0.0469419
35	LGN	0.208831	0.0137942	0.0903903	0.282641	0.0976931	0.16492	0.125337	-0.00633737	-0.100941	0.0805065	-0.00179813	-0.0830924	-0.0834903	-0.0822992	-0.00380813	0.0190616	-0.00829617	0.0449281	0.0779893	0.188852	0	-0.239731	0.158625	0.0597056	-0.0291078	0.052222	0.0235755	-0.0144321	0.0584871	-0.14025	0.245922	-0.0395907	0.221175	-0.115613	0.100239	0.0790593	0.0475404	0.056687	0.259694	-0.0540327	0.00865623	0.0874031	-0.152338	0.0812132	0.214801	0.0374962	-0.0428569	-0.0637929
79	LECN	-2.22645e-05	0.174365	-0.108114	0.0643887	-0.101589	0.0176686	-0.0304444	0.107954	0.0396519	0.0854379	0.14787	0.379142	-0.0824255	0.475891	0.504024	0.304161	0.304008	0.502808	-0.130496	0.249678	-0.239731	0	-0.0429386	0.642419	-0.0523343	0.249715	-0.112613	-4.88527e-05	0.38102	0.670021	-0.0552666	0.157661	-0.126892	0.457374	-0.285155	-0.177974	-0.010588	0.272265	0.329214	0.04224	0.0749236	-0.15769	0.149905	0.248424	0.175386	0.451111	-0.0120867	-0.122015
87	LECN	-0.0206227	-0.121524	-0.124412	-0.0665828	0.0340535	-0.0690757	-0.0224275	-0.12441	0.0391329	0.0686167	-0.0597196	-0.101392	-0.0263737	-0.035612	-0.0793328	-0.0810679	-0.027803	-0.0886651	-0.236081	-0.0625318	0.158625	-0.0429386	0	0.17608	0.025346	0.0911907	0.209785	0.40987	0.12377	0.0818087	0.2345	-0.182032	-0.179702	0.132294	-0.267588	-0.0347504	-0.0395228	0.0365751	0.215896	0.0485338	0.14386	0.259926	0.136009	-0.0504807	0.0048672	0.106801	-0.24294	-0.155886
59	LECN	-0.0221832	0.150885	-0.140424	-0.0283347	0.019461	0.00441757	-0.0947702	0.109172	-0.0250174	0.0969831	0.161796	0.210956	-0.0841696	0.379375	0.139439	0.239647	0.209571	0.267957	-0.240473	0.300865	0.0597056	0.642419	0.17608	0	0.122981	0.416166	0.117878	0.352488	0.529905	0.554196	0.109714	0.013122	-0.170337	0.390799	-0.312082	-0.16111	0.0314127	0.193839	0.580266	0.0432983	0.198888	-0.0519671	0.11844	0.103495	0.0555255	0.410737	-0.28862	-0.173839
20	DDMN	0.187495	0.405487	-0.184235	0.174519	0.12118	0.113252	-0.117597	0.177128	0.0959104	0.11884	0.148512	0.0532284	-0.0470547	-0.313628	-0.0803545	-0.272304	0.00903431	0.221504	0.212665	-0.0859985	-0.0291078	-0.0523343	0.025346	0.122981	0	0.573689	0.160507	0.153221	0.40187	0.0645446	0.219287	0.260338	0.227072	0.283239	0.102498	-0.0156684	0.0384202	-0.00405099	0.360446	0.0872149	0.0664038	-0.0341586	0.0453465	-0.0704752	-0.107671	0.301884	-0.14941	-0.0121441
22	DDMN	-0.0441025	0.137963	-0.0965523	0.0625622	0.116802	-0.0284959	-0.188813	0.120885	0.101364	0.0352058	0.126292	0.121593	0.0118012	-0.185147	-0.142675	-0.336426	0.253506	0.622993	-0.194917	0.155473	0.052222	0.249715	0.0911907	0.416166	0.573689	0	0.0618643	0.121824	0.603012	0.250388	-0.0299257	0.560624	0.161436	0.291	0.115445	-0.0218476	-0.00568361	-0.176511	0.373697	0.192126	0.056181	0.00613837	0.157187	-0.072153	-0.0338859	0.651321	-0.360082	0.0900701
72	DDMN	-0.0288678	-0.00572616	-0.124344	-0.016698	0.217379	0.0570638	-0.0180542	0.0415669	0.0890387	0.192252	-0.064097	-0.127484	-0.114976	-0.0444619	-0.00697094	-0.158814	0.0568451	0.00280038	0.178056	-0.0202654	0.0235755	-0.112613	0.209785	0.117878	0.160507	0.0618643	0	0.301774	0.0474801	0.113863	0.00368231	-0.0828287	-0.0439012	0.133194	-0.185393	-0.106015	-0.107395	0.0732708	0.102807	0.157881	-0.0700664	-0.0527376	0.00879817	-0.024727	-0.0577297	0.0264072	-0.0792037	0.108981
42	DDMN	-0.0920062	0.00786163	-0.208223	-0.0633249	0.138889	0.182715	-0.10612	-0.0341391	-0.122274	0.0928064	0.174463	0.0615578	0.107188	0.0678804	-0.0815774	0.211238	-0.0494071	-0.0447128	-0.177632	0.0854801	-0.0144321	-4.88527e-05	0.40987	0.352488	0.153221	0.121824	0.301774	0	0.319426	0.111124	0.354901	-0.14671	-0.2328	0.360869	0.0159369	0.177162	0.143853	0.343027	0.548978	0.375922	0.369804	0.157285	-0.0100442	-0.00641287	-0.0470467	0.323039	-0.295811	-0.198877
31	DDMN	0.0929124	0.254589	-0.142138	0.106266	-0.0706259	0.0117186	-0.209586	0.262531	-0.013221	0.248595	0.239108	0.228354	-0.119798	-0.0364186	0.0408217	0.143905	0.0402518	0.322272	-0.253738	0.146425	0.0584871	0.38102	0.12377	0.529905	0.40187	0.603012	0.0474801	0.319426	0	0.31372	0.371239	0.248996	-0.191632	0.564332	-0.0175396	-0.044273	0.126701	0.25766	0.794543	0.120654	0.196825	-0.0489324	0.104048	0.0750242	-0.0277416	0.525539	-0.298036	-0.0964869
73	DDMN	-0.0336986	0.252945	-0.0386021	0.240843	-0.00332823	-0.110373	-0.224253	0.138832	0.0615883	0.0299988	0.0121235	0.138646	-0.173084	0.461002	0.486287	0.221265	0.147041	0.427687	0.0739259	0.129684	-0.14025	0.670021	0.0818087	0.554196	0.0645446	0.250388	0.113863	0.111124	0.31372	0	-0.0911344	0.0107816	-0.0373416	0.332362	-0.393037	-0.269673	-0.142339	0.265931	0.297242	-0.0423466	0.0290923	-0.222018	0.312583	0.309049	0.348217	0.433125	-0.0903795	-0.124725
80	DDMN	0.217432	0.154263	-0.180078	0.194385	0.066231	0.11732	0.12955	0.0321406	-0.140694	0.0612247	0.14843	-0.0193813	-0.0107422	-0.0924063	0.0432476	0.189464	-0.11359	-0.0853271	0.00978969	0.0761071	0.245922	-0.0552666	0.2345	0.109714	0.219287	-0.0299257	0.00368231	0.354901	0.371239	-0.0911344	0	-0.092225	0.0683517	0.420534	0.166204	0.087632	0.13726	0.43486	0.523329	0.15607	0.266169	0.156285	-0.118807	-0.0347476	0.0794479	0.0872589	-0.0446689	-0.102206
100	DDMN	-0.0214694	0.0944096	-0.0335065	0.0158483	0.0625641	0.0751656	-0.0387737	0.0832324	0.0975447	0.0516237	0.159057	0.141438	0.00670148	-0.107333	0.0158695	-0.235028	0.320301	0.600484	0.0436843	0.196012	-0.0395907	0.157661	-0.182032	0.013122	0.260338	0.560624	-0.0828287	-0.14671	0.248996	0.0107816	-0.092225	0	0.0656862	0.0801328	0.212521	-9.3797e-06	0.0918585	-0.154756	0.118859	0.124801	-0.0553391	-0.10833	0.0559732	0.186362	0.10557	0.375523	-0.0453343	0.162115
68	PSN	0.165062	0.302257	0.0690677	0.35986	0.0827819	0.189866	0.0609551	-0.064352	-0.0261242	-0.0385624	0.125183	-0.0855593	0.0127982	-0.203506	0.030434	-0.198432	0.109262	0.103541	0.378905	0.100357	0.221175	-0.126892	-0.179702	-0.170337	0.227072	0.161436	-0.0439012	-0.2328	-0.191632	-0.0373416	0.0683517	0.0656862	0	-0.0787716	0.117734	0.0625845	-0.0871338	-0.0819361	-0.0656863	0.0610183	0.0439497	0.00683314	-0.0715867	0.0212322	0.130263	-0.0652657	0.155733	0.149706
82	PCN	0.109514	0.177694	-0.336854	0.25941	-0.0729228	0.0827053	-0.113917	0.207494	-0.0883937	0.128933	0.111518	0.171399	-0.0859297	0.0557375	0.272758	0.198149	-0.00217587	0.3174	-0.0171326	0.0262201	-0.115613	0.457374	0.132294	0.390799	0.283239	0.291	0.133194	0.360869	0.564332	0.332362	0.420534	0.0801328	-0.0787716	0	-0.0691718	-0.152047	0.0597904	0.462753	0.596506	0.0861316	0.103705	-0.0443481	0.0498331	-0.0292336	0.098411	0.370878	-0.022742	-0.132576
43	PCN	-0.0276352	0.0585375	-0.00122129	0.0505874	0.0982483	0.258029	0.0956242	0.0261975	-0.180161	-0.234938	0.201613	0.0771286	0.239045	-0.249395	-0.239292	-0.0609415	0.0652692	0.0808631	-0.0809044	0.14178	0.100239	-0.285155	-0.267588	-0.312082	0.102498	0.115445	-0.185393	0.0159369	-0.0175396	-0.393037	0.166204	0.212521	0.117734	-0.0691718	0	0.484293	0.297307	0.0485199	-0.0182363	0.428969	0.199813	0.387166	-0.207402	0.0209777	-0.209102	0.00594458	0.0358016	0.0358421
78	PVN	-0.0144152	-0.0506967	-0.0102082	-0.0660986	0.178872	0.283654	0.189548	-0.0944956	-0.160501	-0.232811	0.299744	0.238858	0.274572	-0.0408853	-0.278178	0.0589265	0.0659591	-0.0205149	-0.0954996	0.200243	0.0790593	-0.177974	-0.0347504	-0.16111	-0.0156684	-0.0218476	-0.106015	0.177162	-0.044273	-0.269673	0.087632	-9.3797e-06	0.0625845	-0.152047	0.484293	0	0.16141	0.0170405	-0.0802779	0.532701	0.423081	0.417393	-0.129233	0.0623766	-0.224746	-0.0645464	0.122488	-0.162141
53	VDMN	0.0657892	0.0743107	-0.0890768	0.240075	-0.0930512	0.196837	-0.0301665	0.106341	-0.279957	-0.0242624	0.368446	0.426684	-0.0190898	0.0375622	0.192076	0.464859	0.0137859	0.0926093	-0.117952	0.0289304	0.0475404	-0.010588	-0.0395228	0.0314127	0.0384202	-0.00568361	-0.107395	0.143853	0.126701	-0.142339	0.13726	0.0918585	-0.0871338	0.0597904	0.297307	0.16141	0	0.333232	0.209989	0.313283	0.249749	0.460529	-0.197109	0.180066	0.0916432	0.0950831	0.0671678	-0.194782
58	VDMN	0.190405	0.357634	-0.141638	0.417655	-0.128692	0.184495	-0.086189	0.227165	-0.271916	0.178818	0.300671	0.392058	-0.111757	0.291233	0.401904	0.575886	0.051246	0.0375535	0.17006	0.047894	0.056687	0.272265	0.0365751	0.193839	-0.00405099	-0.176511	0.0732708	0.343027	0.25766	0.265931	0.43486	-0.154756	-0.0819361	0.462753	0.0485199	0.0170405	0.333232	0	0.45355	0.144748	0.245935	0.140189	-0.190293	0.232739	0.185958	0.0331415	0.0330193	-0.157092
76	VDMN	-0.00227333	0.322927	-0.201289	0.251109	-0.00875536	0.0442825	-0.198727	0.147585	-0.166291	0.241291	0.216104	0.17437	-0.159395	-0.0634937	0.144071	0.292859	0.00462413	0.245046	-0.133039	0.121364	0.259694	0.329214	0.215896	0.580266	0.360446	0.373697	0.102807	0.548978	0.794543	0.297242	0.523329	0.118859	-0.0656863	0.596506	-0.0182363	-0.0802779	0.209989	0.45355	0	0.0876135	0.226881	0.0461551	0.065566	0.0342643	0.0434728	0.531769	-0.40223	-0.0262092
71	VDMN	0.102362	0.0806441	-0.002554	0.12527	0.266737	0.493219	0.147458	-0.0769573	-0.186309	-0.105887	0.464368	0.373358	0.277243	0.120013	0.029365	0.114175	0.201788	0.168701	-0.0137626	0.224345	-0.0540327	0.04224	0.0485338	0.0432983	0.0872149	0.192126	0.157881	0.375922	0.120654	-0.0423466	0.15607	0.124801	0.0610183	0.0861316	0.428969	0.532701	0.313283	0.144748	0.0876135	0	0.484497	0.364698	-0.110184	0.200289	-0.0559005	0.0681976	-0.0123472	-0.0820701
65	VDMN	0.168754	0.0670168	0.0586379	0.115028	0.161488	0.38806	0.0932762	0.142966	-0.162234	0.00909905	0.368728	0.286891	0.16417	0.147879	0.041777	0.409566	0.116461	0.000220711	-0.0781816	0.137268	0.00865623	0.0749236	0.14386	0.198888	0.0664038	0.056181	-0.0700664	0.369804	0.196825	0.0290923	0.266169	-0.0553391	0.0439497	0.103705	0.199813	0.423081	0.249749	0.245935	0.226881	0.484497	0	0.318465	-0.0607567	0.0929133	-0.019021	0.109878	0.039418	-0.289335
17	VDMN	0.133734	0.141602	0.0944754	0.0668707	0.0184294	0.251656	0.0987069	-0.0405233	-0.243577	0.0132004	0.337034	0.400149	0.0790866	-0.0646468	-0.150072	0.0877254	0.0943819	-0.136748	-0.179696	0.0926273	0.0874031	-0.15769	0.259926	-0.0519671	-0.0341586	0.00613837	-0.0527376	0.157285	-0.0489324	-0.222018	0.156285	-0.10833	0.00683314	-0.0443481	0.387166	0.417393	0.460529	0.140189	0.0461551	0.364698	0.318465	0	-0.146678	0.0469097	-0.194037	-0.172265	-0.0572371	-0.145339
67	RECN	-0.199824	-0.115368	0.00647443	-0.136297	0.0820588	-0.271023	-0.22432	-0.0653332	0.140389	-0.168531	-0.27943	-0.276187	-0.108032	-0.0252881	0.0161312	-0.0948221	-0.066702	0.0717556	-0.0552638	-0.00245433	-0.152338	0.149905	0.136009	0.11844	0.0453465	0.157187	0.00879817	-0.0100442	0.104048	0.312583	-0.118807	0.0559732	-0.0715867	0.0498331	-0.207402	-0.129233	-0.197109	-0.190293	0.065566	-0.110184	-0.0607567	-0.146678	0	-0.00581049	0.0154589	0.213725	-0.192711	0.131108
30	RECN	0.199724	0.129839	0.292437	0.26539	0.000146293	0.194786	0.138684	0.124711	-0.119142	-0.00387156	0.238796	0.388204	0.169148	0.450496	0.379578	0.380546	0.233123	0.3113	0.204966	0.259128	0.0812132	0.248424	-0.0504807	0.103495	-0.0704752	-0.072153	-0.024727	-0.00641287	0.0750242	0.309049	-0.0347476	0.186362	0.0212322	-0.0292336	0.0209777	0.0623766	0.180066	0.232739	0.0342643	0.200289	0.0929133	0.0469097	-0.00581049	0	0.323164	0.0567122	0.0868338	-0.0757268
32	RECN	0.0918882	-0.0989453	-0.0776496	0.418857	0.0334323	0.0568473	0.116156	0.0609397	0.0439524	0.0593982	0.0949705	0.0132679	-0.0675975	0.411976	0.703238	0.367594	0.0794687	0.290478	0.280631	0.0141918	0.214801	0.175386	0.0048672	0.0555255	-0.107671	-0.0338859	-0.0577297	-0.0470467	-0.0277416	0.348217	0.0794479	0.10557	0.130263	0.098411	-0.209102	-0.224746	0.0916432	0.185958	0.0434728	-0.0559005	-0.019021	-0.194037	0.0154589	0.323164	0	0.199698	0.296489	-0.0609699
88	RECN	-0.350617	-0.0403014	-0.224085	0.194549	0.210096	-0.0626821	-0.344548	0.0227387	0.0936725	-0.0211272	0.0953626	-0.0387169	-0.0431104	-0.0624201	0.301502	0.0871217	-0.0289389	0.599823	-0.198023	-0.00757632	0.0374962	0.451111	0.106801	0.410737	0.301884	0.651321	0.0264072	0.323039	0.525539	0.433125	0.0872589	0.375523	-0.0652657	0.370878	0.00594458	-0.0645464	0.0950831	0.0331415	0.531769	0.0681976	0.109878	-0.172265	0.213725	0.0567122	0.199698	0	-0.267813	0.00304426
37	RECN	0.281263	-0.11296	-0.0257296	0.245123	-0.0743717	0.164063	0.357607	0.057288	-0.0522954	0.0625106	0.10383	0.0834197	0.0157544	0.153186	0.408618	0.182057	-0.0480629	-0.0223738	0.289348	-0.0903004	-0.0428569	-0.0120867	-0.24294	-0.28862	-0.14941	-0.360082	-0.0792037	-0.295811	-0.298036	-0.0903795	-0.0446689	-0.0453343	0.155733	-0.022742	0.0358016	0.122488	0.0671678	0.0330193	-0.40223	-0.0123472	0.039418	-0.0572371	-0.192711	0.0868338	0.296489	-0.267813	0	-0.155842
51	SMN	-0.177115	-0.0770832	-0.066761	-0.110313	0.124713	-0.177819	-0.0856499	-0.115578	0.0944306	0.128845	-0.144792	-0.221529	-0.0829152	-0.231406	-0.0885671	-0.326195	0.0200678	-0.0636817	0.113465	-0.0469419	-0.0637929	-0.122015	-0.155886	-0.173839	-0.0121441	0.0900701	0.108981	-0.198877	-0.0964869	-0.124725	-0.102206	0.162115	0.149706	-0.132576	0.0358421	-0.162141	-0.194782	-0.157092	-0.0262092	-0.0820701	-0.289335	-0.145339	0.131108	-0.0757268	-0.0609699	0.00304426	-0.155842	0
14	SMN	0.113516	-0.0516926	0.217966	0.131382	0.000687422	0.318021	0.277901	-0.0148832	-0.198405	-0.270248	0.25311	0.187605	0.396542	0.0266531	-0.0250757	0.152153	-0.0667585	0.0172451	-0.0365185	-0.021392	0.0291828	-0.114926	-0.171225	-0.143334	-0.141886	-0.0902351	-0.17481	-0.00933903	-0.145304	-0.166766	0.0368263	-0.0711113	0.0378051	-0.118699	0.304152	0.268205	0.260046	0.0313025	-0.180061	0.304695	0.280279	0.194751	-0.196668	0.116185	0.113956	-0.164238	0.179373	-0.187518
12	SMN	0.272563	-0.164286	0.133054	0.0274334	-0.0058682	0.045419	0.28096	-0.1113	-0.0987402	-0.189315	-0.0451674	-0.178661	0.105045	0.123532	0.0252706	0.0468154	-0.164648	-0.384221	0.201042	-0.0226967	0.129967	-0.20337	-0.179901	-0.214537	-0.205279	-0.285431	-0.151703	-0.324588	-0.308153	-0.237994	-0.0365022	-0.303924	0.225252	-0.309986	-0.124504	0.0564613	-0.0427606	-0.134591	-0.41584	-0.108163	-0.0596606	-0.036571	-0.0612066	-0.114213	0.118566	-0.487503	0.399427	-0.0631537
50	SMN	0.211607	0.218905	0.126771	0.156593	0.0719657	0.256723	0.133246	0.0969108	-0.0771814	0.189508	0.17596	0.182924	0.00908817	0.170909	0.152827	0.104366	0.0946854	0.0110805	0.188109	0.0370878	-0.021374	0.0855885	0.0582476	0.154413	0.110827	-0.00407178	0.331189	0.161103	0.0999283	0.18751	-0.0632339	-0.00885664	0.0052033	0.0886479	-0.127783	-0.0543995	-0.0446212	0.208976	0.0897876	0.22696	0.152854	0.0754	0.23046	0.322521	0.014252	-0.094497	0.0591292	0.000711873
	name of IC	26	91	66	64	25	86	44	29	23	7	40	60	49	33	5	70	57	46	21	34	35	79	87	59	20	22	72	42	31	73	80	100	68	82	43	78	53	58	76	71	65	17	67	30	32	88	37	51
	name of ICN	ASN	ASN	ASN	ASN	AUN	AUN	AUN	AGN	AGN	AGN	HVN	HVN	VSN	VSN	VSN	VSN	LGN	LGN	LGN	LGN	LGN	LECN	LECN	LECN	DDMN	DDMN	DDMN	DDMN	DDMN	DDMN	DDMN	DDMN	PSN	PCN	PCN	PVN	VDMN	VDMN	VDMN	VDMN	VDMN	VDMN	RECN	RECN	RECN	RECN	RECN	SMN
[truncated: 3 more columns]

## Sheet: real-post-State3
name of IC	name of ICN	correlations
26	ASN	0	0.880618	0.551604	0.699343	0.0396485	0.328441	0.594691	0.36032	0.469003	-0.172701	-0.404213	0.239138	0.26331	0.192935	0.519347	-0.444719	0.159003	0.519485	0.606495	-0.196495	0.450264	-0.335769	-0.304487	-0.662868	0.481737	0.302676	-0.215999	-0.547613	-0.0602275	0.310926	-0.143658	0.00629727	0.212543	-0.425278	-0.530933	-0.24192	-0.0644952	-0.211456	-0.494101	-0.271021	-0.491044	-0.376749	-0.664138	0.272231	0.531927	-0.262338	0.430733	-0.418708
91	ASN	0.880618	0	0.558422	0.959617	0.140724	0.214626	0.730599	0.687268	0.926258	-0.227971	-0.535331	0.421474	0.252932	0.439279	0.704069	-0.860021	0.320558	0.762034	1.15272	-0.402652	0.633916	-0.405011	-0.784997	-0.9705	0.887351	0.563128	-0.185762	-1.01489	0.0775937	0.517501	-0.469749	0.174544	0.19898	-0.640694	-0.789217	-0.49435	0.0060569	-0.136428	-0.830663	-0.443532	-0.886293	-0.615102	-1.1013	0.407581	0.955064	-0.335794	0.49863	-0.673195
66	ASN	0.551604	0.558422	0	0.228214	0.149203	0.0568732	0.179283	0.113667	0.467041	-0.0396335	-0.654761	0.0739197	0.20055	0.350747	0.456876	-0.588462	0.0699997	0.484005	0.434264	-0.344057	0.345242	-0.286428	-0.325799	-0.517528	0.177593	0.104577	-0.0556311	-0.539268	-0.187274	0.194413	-0.265518	-0.2631	-0.0930674	-0.448438	-0.58785	-0.384042	-0.272728	-0.259229	-0.511421	-0.375948	-0.580674	-0.478725	-0.361415	0.308717	0.19261	-0.32531	0.308727	-0.319719
64	ASN	0.699343	0.959617	0.228214	0	-0.130997	0.258547	0.484235	0.65633	0.523205	-0.1912	-0.257256	0.393813	0.203712	0.121247	0.625668	-0.421489	0.0241594	0.564912	0.763199	-0.258297	0.72284	-0.377151	-0.59274	-0.744968	0.670072	0.491598	-0.254879	-0.702435	0.142958	0.387437	-0.152548	0.137174	0.294958	-0.378058	-0.432391	-0.315358	0.0563667	-0.109723	-0.450174	-0.484643	-0.57934	-0.366119	-0.7308	0.421749	0.972536	0.0782437	0.737997	-0.634905
25	AUN	0.0396485	0.140724	0.149203	-0.130997	0	0.421073	0.308518	-0.00972557	0.308688	0.126315	-0.232564	-0.145743	0.364895	0.241204	0.0674313	-0.451296	0.241372	-0.0238847	0.334168	-0.138375	0.0314872	-0.184394	-0.185732	-0.287917	0.0733786	0.0146816	0.566479	-0.136473	-0.154197	0.0823629	-0.307793	-0.284845	-0.138759	-0.104181	-0.302058	-0.215478	-0.234214	-0.094936	-0.378217	0.093831	-0.418882	-0.13595	-0.230288	0.165394	0.0671205	-0.566687	0.0215171	0.0475023
86	AUN	0.328441	0.214626	0.0568732	0.258547	0.421073	0	0.470341	0.0973166	0.0543257	-0.0282956	-0.0211587	0.106466	0.406505	0.0642462	0.115646	-0.117464	0.0144746	0.0648369	0.322243	-0.0790097	0.169891	-0.282973	-0.0814636	-0.343322	0.274517	0.00483247	0.114753	0.0167438	-0.041656	-0.224083	0.0493569	-0.00522118	0.196073	0.0391317	-0.131274	0.106332	0.0724492	-0.0228542	-0.129051	0.339553	-0.0800976	-0.132635	-0.120605	0.0688056	0.150366	-0.370279	0.245821	0.181717
44	AUN	0.594691	0.730599	0.179283	0.484235	0.308518	0.470341	0	0.422826	0.698456	-0.284083	-0.389584	0.41978	0.360616	0.173577	0.354812	-0.763793	0.404368	0.63852	0.897414	-0.346198	0.727545	-0.553182	-0.465327	-0.833892	0.564949	0.407221	-0.0621172	-0.611513	-0.284812	0.13517	-0.439856	0.12041	0.167001	-0.485111	-0.469017	-0.1089	-0.109585	-0.290771	-0.751654	-0.30193	-0.613177	-0.493445	-0.857022	0.34442	0.699561	-0.377451	0.496257	-0.476438
29	AGN	0.36032	0.687268	0.113667	0.65633	-0.00972557	0.0973166	0.422826	0	0.622729	0.0877308	-0.448145	0.279901	0.163125	0.380468	0.520505	-0.515781	0.0754295	0.468655	0.626099	-0.479928	0.516729	-0.271781	-0.693691	-0.531519	0.671008	0.403774	-0.153097	-0.55296	0.194691	0.415185	-0.428398	0.0774159	0.0158086	-0.353044	-0.552788	-0.40112	0.0167827	-0.0126213	-0.411349	-0.447079	-0.551958	-0.533067	-0.717491	0.480084	0.867264	-0.108374	0.349287	-0.549863
23	AGN	0.469003	0.926258	0.467041	0.523205	0.308688	0.0543257	0.698456	0.622729	0	-0.216063	-0.690986	0.298116	0.361631	0.334613	0.560875	-1.16619	0.445591	0.868812	0.794259	-0.492297	0.46078	-0.507343	-0.553997	-0.796236	0.683642	0.820885	0.129517	-1.01208	0.0657481	0.517533	-0.744478	0.32077	-0.147009	-0.516739	-0.849839	-0.581441	-0.143019	-0.289472	-0.904546	-0.476981	-1.05951	-0.746285	-1.15173	0.465783	0.805561	-0.249921	0.338684	-0.619355
7	AGN	-0.172701	-0.227971	-0.0396335	-0.1912	0.126315	-0.0282956	-0.284083	0.0877308	-0.216063	0	0.047237	-0.147345	-0.269883	-0.0121426	-0.184244	0.200782	-0.247121	-0.483719	-0.182658	-0.111906	-0.125127	0.111846	-0.00784609	0.225953	-0.103298	-0.259531	0.265548	0.351973	0.29347	-0.147691	0.225168	-0.154713	-0.095843	0.307993	0.0185127	-0.0634641	0.141572	0.0916173	0.253446	0.0277827	0.175168	0.0396438	0.202708	-0.00984427	-0.163485	0.000174806	0.068202	0.307298
40	HVN	-0.404213	-0.535331	-0.654761	-0.257256	-0.232564	-0.0211587	-0.389584	-0.448145	-0.690986	0.047237	0	0.133562	0.032056	-0.310856	-0.422192	0.686228	-0.160504	-0.47658	-0.568507	0.449488	-0.379947	0.401286	0.553557	0.478713	-0.41706	-0.336844	-0.232871	0.555338	-0.118052	-0.463389	0.622535	0.0928742	0.159524	0.42218	0.640827	0.823385	0.419312	0.20813	0.637482	0.454542	0.76039	0.792475	0.716379	-0.479998	-0.549555	0.248384	-0.344899	0.276404
60	HVN	0.239138	0.421474	0.0739197	0.393813	-0.145743	0.106466	0.41978	0.279901	0.298116	-0.147345	0.133562	0	0.311892	0.257694	0.380434	-0.192706	0.412821	0.498438	0.411591	-0.231613	0.193486	-0.106567	-0.0741688	-0.393588	0.226123	0.258881	-0.22557	-0.467221	-0.108803	0.0119838	-0.226177	0.235959	-0.0889962	-0.185145	-0.275365	0.170548	0.309549	-0.118209	-0.378512	-0.0927237	-0.312813	-0.0736873	-0.506082	0.0971243	0.382422	-0.00575092	0.279552	-0.406806
49	VSN	0.26331	0.252932	0.20055	0.203712	0.364895	0.406505	0.360616	0.163125	0.361631	-0.269883	0.032056	0.311892	0	0.283038	0.234609	-0.246458	0.193471	0.296343	0.190106	-0.0287427	-0.104244	-0.129512	-0.199548	-0.322591	0.249078	0.202787	0.176764	-0.307313	-0.0109471	0.0254753	-0.150026	-0.0780655	-0.0192826	-0.138468	-0.298809	0.0677703	0.0536078	-0.369109	-0.271475	-0.0641855	-0.238837	-0.193394	-0.348695	0.0116456	0.266883	-0.138264	0.077305	-0.287388
33	VSN	0.192935	0.439279	0.350747	0.121247	0.241204	0.0642462	0.173577	0.380468	0.334613	-0.0121426	-0.310856	0.257694	0.283038	0	0.553273	-0.315993	0.461576	0.400841	0.331667	-0.255525	0.242599	0.041345	-0.210643	-0.206695	-0.00695025	0.0532734	0.0671536	-0.379745	-0.0598814	0.519703	-0.391997	-0.0240082	-0.175365	-0.17514	-0.669897	-0.466641	0.0168028	0.0478781	-0.391394	-0.0501321	-0.369931	-0.161658	-0.333088	0.509099	0.474618	-0.373339	0.200827	-0.228235
5	VSN	0.519347	0.704069	0.456876	0.625668	0.0674313	0.115646	0.354812	0.520505	0.560875	-0.184244	-0.422192	0.380434	0.234609	0.553273	0	-0.546775	0.194346	0.755996	0.662861	-0.532336	0.329187	0.0145605	-0.327685	-0.589806	0.554244	0.333037	-0.100201	-0.807192	0.0687885	0.374656	-0.365265	0.0771695	-0.0147566	-0.239579	-0.808515	-0.424541	0.200945	-0.037877	-0.546476	-0.179322	-0.765474	-0.566103	-0.672187	0.275325	0.81514	-0.0821159	0.480367	-0.49893
70	VSN	-0.444719	-0.860021	-0.588462	-0.421489	-0.451296	-0.117464	-0.763793	-0.515781	-1.16619	0.200782	0.686228	-0.192706	-0.246458	-0.315993	-0.546775	0	-0.665705	-0.746722	-0.970837	0.473022	-0.648052	0.703723	0.576438	1.01642	-0.699687	-0.625104	-0.123071	0.870785	0.14833	-0.284011	0.763292	-0.205799	-0.0544378	0.680718	0.701765	0.484277	0.16079	0.237625	1.07486	0.307478	1.30924	0.719349	1.23901	-0.460739	-0.572849	0.374269	-0.533472	0.487491
57	LGN	0.159003	0.320558	0.0699997	0.0241594	0.241372	0.0144746	0.404368	0.0754295	0.445591	-0.247121	-0.160504	0.412821	0.193471	0.461576	0.194346	-0.665705	0	0.533897	0.313212	0.169084	0.40569	-0.0615767	-0.0832797	-0.182105	0.337725	0.60274	0.133619	-0.334548	-0.091141	0.246798	-0.310743	0.316033	-0.155881	-0.240658	-0.181447	-0.0988013	0.123839	-0.0760111	-0.355179	0.0299382	-0.315402	-0.0909943	-0.322447	0.39354	0.251439	-0.0200249	0.27514	-0.206236
46	LGN	0.519485	0.762034	0.484005	0.564912	-0.0238847	0.0648369	0.63852	0.468655	0.868812	-0.483719	-0.47658	0.498438	0.296343	0.400841	0.755996	-0.746722	0.533897	0	0.831175	-0.314553	0.634182	-0.384912	-0.414098	-0.62624	0.697793	0.771284	-0.158479	-0.894011	0.131139	0.43276	-0.393783	0.581153	-0.000373818	-0.396579	-0.551942	-0.350603	0.00252812	-0.261959	-0.506582	-0.375133	-0.783216	-0.5404	-0.76926	0.573155	0.793499	0.103763	0.410736	-0.56393
21	LGN	0.606495	1.15272	0.434264	0.763199	0.334168	0.322243	0.897414	0.626099	0.794259	-0.182658	-0.568507	0.411591	0.190106	0.331667	0.662861	-0.970837	0.313212	0.831175	0	-0.404591	0.779001	-0.617988	-0.821691	-1.07439	0.80754	0.450945	-0.0722141	-0.953036	-0.100812	0.217184	-0.466308	0.133452	0.306543	-0.713588	-0.688053	-0.424468	-0.119045	-0.258723	-0.892092	-0.377984	-0.938346	-0.590354	-1.01959	0.370456	0.870026	-0.353577	0.645385	-0.547318
34	LGN	-0.196495	-0.402652	-0.344057	-0.258297	-0.138375	-0.0790097	-0.346198	-0.479928	-0.492297	-0.111906	0.449488	-0.231613	-0.0287427	-0.255525	-0.532336	0.473022	0.169084	-0.314553	-0.404591	0	-0.131192	0.341845	0.198187	0.635801	-0.290116	-0.106997	0.0517456	0.492683	0.16191	-0.214876	0.430051	0.158733	0.322701	0.340768	0.585002	0.32477	0.0637139	-0.0358425	0.480175	0.23583	0.664552	0.518072	0.503984	-0.0625599	-0.384232	0.256576	-0.164112	0.290696
35	LGN	0.450264	0.633916	0.345242	0.72284	0.0314872	0.169891	0.727545	0.516729	0.46078	-0.125127	-0.379947	0.193486	-0.104244	0.242599	0.329187	-0.648052	0.40569	0.634182	0.779001	-0.131192	0	-0.570596	-0.611929	-0.677347	0.487484	0.535042	-0.212057	-0.617048	0.0226003	0.212533	-0.305349	0.173086	0.286021	-0.505773	-0.24468	-0.204601	-0.0299934	-0.118883	-0.550444	-0.372365	-0.569245	-0.277436	-0.646084	0.305226	0.66587	-0.0717697	0.489773	-0.552747
79	LECN	-0.335769	-0.405011	-0.286428	-0.377151	-0.184394	-0.282973	-0.553182	-0.271781	-0.507343	0.111846	0.401286	-0.106567	-0.129512	0.041345	0.0145605	0.703723	-0.0615767	-0.384912	-0.617988	0.341845	-0.570596	0	0.447162	0.781612	-0.406824	-0.289015	0.0725359	0.483626	0.150617	0.0883879	0.222504	-0.158126	-0.163628	0.542863	0.213415	0.267853	0.2871	0.307629	0.646935	0.352868	0.606259	0.438458	0.588827	-0.0775056	-0.329789	0.215673	-0.320379	0.160137
87	LECN	-0.304487	-0.784997	-0.325799	-0.59274	-0.185732	-0.0814636	-0.465327	-0.693691	-0.553997	-0.00784609	0.553557	-0.0741688	-0.199548	-0.210643	-0.327685	0.576438	-0.0832797	-0.414098	-0.821691	0.198187	-0.611929	0.447162	0	0.689411	-0.720737	-0.401408	-0.124476	0.716996	-0.172068	-0.124796	0.352539	-0.176441	-0.302044	0.503596	0.407362	0.425658	0.081625	0.253746	0.644659	0.482941	0.618066	0.637956	0.911448	-0.263516	-0.654136	0.319157	-0.432962	0.378699
59	LECN	-0.662868	-0.9705	-0.517528	-0.744968	-0.287917	-0.343322	-0.833892	-0.531519	-0.796236	0.225953	0.478713	-0.393588	-0.322591	-0.206695	-0.589806	1.01642	-0.182105	-0.62624	-1.07439	0.635801	-0.677347	0.781612	0.689411	0	-0.622598	-0.332384	0.107916	1.02776	0.404481	0.0271458	0.666022	-0.0916324	-0.192656	0.817202	0.644153	0.202754	0.01076	0.154066	1.09967	0.258587	1.1419	0.714192	0.960729	-0.260107	-0.764358	0.464232	-0.581475	0.488286
20	DDMN	0.481737	0.887351	0.177593	0.670072	0.0733786	0.274517	0.564949	0.671008	0.683642	-0.103298	-0.41706	0.226123	0.249078	-0.00695025	0.554244	-0.699687	0.337725	0.697793	0.80754	-0.290116	0.487484	-0.406824	-0.720737	-0.622598	0	0.853745	-0.0191211	-0.495729	0.319278	0.341689	-0.220263	0.433882	0.193949	-0.195329	-0.38585	-0.328715	0.0431677	-0.324101	-0.397774	-0.231028	-0.503598	-0.589331	-0.818448	0.334498	0.661167	0.082028	0.399709	-0.355654
22	DDMN	0.302676	0.563128	0.104577	0.491598	0.0146816	0.00483247	0.407221	0.403774	0.820885	-0.259531	-0.336844	0.258881	0.202787	0.0532734	0.333037	-0.625104	0.60274	0.771284	0.450945	-0.106997	0.535042	-0.289015	-0.401408	-0.332384	0.853745	0	0.099813	-0.492504	0.625868	0.62821	-0.314816	0.602824	-0.175171	-0.228517	-0.269299	-0.386107	0.134575	-0.235365	-0.338417	-0.174156	-0.449403	-0.251495	-0.601059	0.256209	0.562673	0.272609	0.194207	-0.310714
72	DDMN	-0.215999	-0.185762	-0.0556311	-0.254879	0.566479	0.114753	-0.0621172	-0.153097	0.129517	0.265548	-0.232871	-0.22557	0.176764	0.0671536	-0.100201	-0.123071	0.133619	-0.158479	-0.0722141	0.0517456	-0.212057	0.0725359	-0.124476	0.107916	-0.0191211	0.099813	0	0.193247	0.153673	0.0913163	-0.234828	-0.0976832	-0.328971	0.115668	-0.112769	-0.162879	-0.190117	0.0998561	-0.0580959	0.39345	-0.0547244	-0.0126352	-0.0307316	0.191757	-0.0936371	-0.309051	-0.168965	0.447206
42	DDMN	-0.547613	-1.01489	-0.539268	-0.702435	-0.136473	0.0167438	-0.611513	-0.55296	-1.01208	0.351973	0.555338	-0.467221	-0.307313	-0.379745	-0.807192	0.870785	-0.334548	-0.894011	-0.953036	0.492683	-0.617048	0.483626	0.716996	1.02776	-0.495729	-0.492504	0.193247	0	0.103862	-0.261837	0.686244	-0.350757	-0.0118573	0.758917	0.817124	0.378775	0.0417193	0.1723	1.02365	0.568966	1.37527	0.708727	1.06483	-0.298401	-0.826479	0.275621	-0.412963	0.630196
31	DDMN	-0.0602275	0.0775937	-0.187274	0.142958	-0.154197	-0.041656	-0.284812	0.194691	0.0657481	0.29347	-0.118052	-0.108803	-0.0109471	-0.0598814	0.0687885	0.14833	-0.091141	0.131139	-0.100812	0.16191	0.0226003	0.150617	-0.172068	0.404481	0.319278	0.625868	0.153673	0.103862	0	0.4344	0.241243	0.271622	-0.175132	0.388361	0.108899	-0.28751	0.0528119	0.00556433	0.389461	-0.0778095	0.167617	0.0620045	-0.0582107	0.156405	0.105874	0.603813	-0.159754	-0.0307231
73	DDMN	0.310926	0.517501	0.194413	0.387437	0.0823629	-0.224083	0.13517	0.415185	0.517533	-0.147691	-0.463389	0.0119838	0.0254753	0.519703	0.374656	-0.284011	0.246798	0.43276	0.217184	-0.214876	0.212533	0.0883879	-0.124796	0.0271458	0.341689	0.62821	0.0913163	-0.261837	0.4344	0	-0.283829	-0.0492479	-0.40856	-0.0375751	-0.534107	-0.70174	-0.149999	-0.0204503	-0.143612	-0.366185	-0.286606	-0.156936	-0.310735	0.572108	0.572092	0.146932	0.057722	-0.457334
80	DDMN	-0.143658	-0.469749	-0.265518	-0.152548	-0.307793	0.0493569	-0.439856	-0.428398	-0.744478	0.225168	0.622535	-0.226177	-0.150026	-0.391997	-0.365265	0.763292	-0.310743	-0.393783	-0.466308	0.430051	-0.305349	0.222504	0.352539	0.666022	-0.220263	-0.314816	-0.234828	0.686244	0.241243	-0.283829	0	-0.028182	0.214508	0.544073	0.673222	0.288993	0.276846	0.180911	1.03938	0.278453	0.888486	0.492275	0.595036	-0.387692	-0.521631	0.506787	-0.243912	0.447698
100	DDMN	0.00629727	0.174544	-0.2631	0.137174	-0.284845	-0.00522118	0.12041	0.0774159	0.32077	-0.154713	0.0928742	0.235959	-0.0780655	-0.0240082	0.0771695	-0.205799	0.316033	0.581153	0.133452	0.158733	0.173086	-0.158126	-0.176441	-0.0916324	0.433882	0.602824	-0.0976832	-0.350757	0.271622	-0.0492479	-0.028182	0	0.0767684	-0.0840246	0.0594474	0.00214041	0.223222	0.100053	0.031358	0.0137524	-0.0864793	-0.173252	-0.263864	0.146637	0.159752	0.428182	-0.0979211	0.0846636
68	PSN	0.212543	0.19898	-0.0930674	0.294958	-0.138759	0.196073	0.167001	0.0158086	-0.147009	-0.095843	0.159524	-0.0889962	-0.0192826	-0.175365	-0.0147566	-0.0544378	-0.155881	-0.000373818	0.306543	0.322701	0.286021	-0.163628	-0.302044	-0.192656	0.193949	-0.175171	-0.328971	-0.0118573	-0.175132	-0.40856	0.214508	0.0767684	0	0.100497	0.123555	0.232103	0.150964	-0.185439	0.0497015	-0.0118614	0.00194206	-0.143833	-0.113561	-0.0844494	0.13256	-0.0123367	0.327122	-0.0332263
82	PCN	-0.425278	-0.640694	-0.448438	-0.378058	-0.104181	0.0391317	-0.485111	-0.353044	-0.516739	0.307993	0.42218	-0.185145	-0.138468	-0.17514	-0.239579	0.680718	-0.240658	-0.396579	-0.713588	0.340768	-0.505773	0.542863	0.503596	0.817202	-0.195329	-0.228517	0.115668	0.758917	0.388361	-0.0375751	0.544073	-0.0840246	0.100497	0	0.39559	0.261572	0.149534	0.0376544	0.845481	0.350754	0.823348	0.456078	0.605222	-0.119621	-0.453608	0.304086	-0.365853	0.431434
43	PCN	-0.530933	-0.789217	-0.58785	-0.432391	-0.302058	-0.131274	-0.469017	-0.552788	-0.849839	0.0185127	0.640827	-0.275365	-0.298809	-0.669897	-0.808515	0.701765	-0.181447	-0.551942	-0.688053	0.585002	-0.24468	0.213415	0.407362	0.644153	-0.38585	-0.269299	-0.112769	0.817124	0.108899	-0.534107	0.673222	0.0594474	0.123555	0.39559	0	0.664338	0.175749	0.113198	0.787162	0.482204	0.943347	0.838379	0.666045	-0.432306	-0.732539	0.508322	-0.34145	0.551133
78	PVN	-0.24192	-0.49435	-0.384042	-0.315358	-0.215478	0.106332	-0.1089	-0.40112	-0.581441	-0.0634641	0.823385	0.170548	0.0677703	-0.466641	-0.424541	0.484277	-0.0988013	-0.350603	-0.424468	0.32477	-0.204601	0.267853	0.425658	0.202754	-0.328715	-0.386107	-0.162879	0.378775	-0.28751	-0.70174	0.288993	0.00214041	0.232103	0.261572	0.664338	0	0.21339	-0.0253186	0.310981	0.545995	0.441772	0.496409	0.498809	-0.352141	-0.473771	0.218316	-0.0524723	0.230565
53	VDMN	-0.0644952	0.0060569	-0.272728	0.0563667	-0.234214	0.0724492	-0.109585	0.0167827	-0.143019	0.141572	0.419312	0.309549	0.0536078	0.0168028	0.200945	0.16079	0.123839	0.00252812	-0.119045	0.0637139	-0.0299934	0.2871	0.081625	0.01076	0.0431677	0.134575	-0.190117	0.0417193	0.0528119	-0.149999	0.276846	0.223222	0.150964	0.149534	0.175749	0.21339	0	0.255203	0.137111	0.214197	0.160038	0.104073	-0.000212952	-0.117622	0.0801192	0.251899	0.00645709	-0.0254287
58	VDMN	-0.211456	-0.136428	-0.259229	-0.109723	-0.094936	-0.0228542	-0.290771	-0.0126213	-0.289472	0.0916173	0.20813	-0.118209	-0.369109	0.0478781	-0.037877	0.237625	-0.0760111	-0.261959	-0.258723	-0.0358425	-0.118883	0.307629	0.253746	0.154066	-0.324101	-0.235365	0.0998561	0.1723	0.00556433	-0.0204503	0.180911	0.100053	-0.185439	0.0376544	0.113198	-0.0253186	0.255203	0	0.243954	0.26948	0.190072	0.248787	0.243445	-0.0954865	-0.183702	0.0544885	-0.28004	0.236616
76	VDMN	-0.494101	-0.830663	-0.511421	-0.450174	-0.378217	-0.129051	-0.751654	-0.411349	-0.904546	0.253446	0.637482	-0.378512	-0.271475	-0.391394	-0.546476	1.07486	-0.355179	-0.506582	-0.892092	0.480175	-0.550444	0.646935	0.644659	1.09967	-0.397774	-0.338417	-0.0580959	1.02365	0.389461	-0.143612	1.03938	0.031358	0.0497015	0.845481	0.787162	0.310981	0.137111	0.243954	0	0.37012	1.25372	0.601079	1.02904	-0.220781	-0.609294	0.605107	-0.561036	0.592
71	VDMN	-0.271021	-0.443532	-0.375948	-0.484643	0.093831	0.339553	-0.30193	-0.447079	-0.476981	0.0277827	0.454542	-0.0927237	-0.0641855	-0.0501321	-0.179322	0.307478	0.0299382	-0.375133	-0.377984	0.23583	-0.372365	0.352868	0.482941	0.258587	-0.231028	-0.174156	0.39345	0.568966	-0.0778095	-0.366185	0.278453	0.0137524	-0.0118614	0.350754	0.482204	0.545995	0.214197	0.26948	0.37012	0	0.407075	0.561107	0.440152	-0.251354	-0.488581	0.0846253	-0.258887	0.800331
65	VDMN	-0.491044	-0.886293	-0.580674	-0.57934	-0.418882	-0.0800976	-0.613177	-0.551958	-1.05951	0.175168	0.76039	-0.312813	-0.238837	-0.369931	-0.765474	1.30924	-0.315402	-0.783216	-0.938346	0.664552	-0.569245	0.606259	0.618066	1.1419	-0.503598	-0.449403	-0.0547244	1.37527	0.167617	-0.286606	0.888486	-0.0864793	0.00194206	0.823348	0.943347	0.441772	0.160038	0.190072	1.25372	0.407075	0	0.800642	1.04803	-0.371949	-0.772209	0.428312	-0.474482	0.572051
17	VDMN	-0.376749	-0.615102	-0.478725	-0.366119	-0.13595	-0.132635	-0.493445	-0.533067	-0.746285	0.0396438	0.792475	-0.0736873	-0.193394	-0.161658	-0.566103	0.719349	-0.0909943	-0.5404	-0.590354	0.518072	-0.277436	0.438458	0.637956	0.714192	-0.589331	-0.251495	-0.0126352	0.708727	0.0620045	-0.156936	0.492275	-0.173252	-0.143833	0.456078	0.838379	0.496409	0.104073	0.248787	0.601079	0.561107	0.800642	0	0.65501	-0.341458	-0.573478	0.219455	-0.403315	0.427776
67	RECN	-0.664138	-1.1013	-0.361415	-0.7308	-0.230288	-0.120605	-0.857022	-0.717491	-1.15173	0.202708	0.716379	-0.506082	-0.348695	-0.333088	-0.672187	1.23901	-0.322447	-0.76926	-1.01959	0.503984	-0.646084	0.588827	0.911448	0.960729	-0.818448	-0.601059	-0.0307316	1.06483	-0.0582107	-0.310735	0.595036	-0.263864	-0.113561	0.605222	0.666045	0.498809	-0.000212952	0.243445	1.02904	0.440152	1.04803	0.65501	0	-0.259386	-0.84755	0.308033	-0.560182	0.714757
30	RECN	0.272231	0.407581	0.308717	0.421749	0.165394	0.0688056	0.34442	0.480084	0.465783	-0.00984427	-0.479998	0.0971243	0.0116456	0.509099	0.275325	-0.460739	0.39354	0.573155	0.370456	-0.0625599	0.305226	-0.0775056	-0.263516	-0.260107	0.334498	0.256209	0.191757	-0.298401	0.156405	0.572108	-0.387692	0.146637	-0.0844494	-0.119621	-0.432306	-0.352141	-0.117622	-0.0954865	-0.220781	-0.251354	-0.371949	-0.341458	-0.259386	0	0.739078	-0.0429907	0.377566	-0.412151
32	RECN	0.531927	0.955064	0.19261	0.972536	0.0671205	0.150366	0.699561	0.867264	0.805561	-0.163485	-0.549555	0.382422	0.266883	0.474618	0.81514	-0.572849	0.251439	0.793499	0.870026	-0.384232	0.66587	-0.329789	-0.654136	-0.764358	0.661167	0.562673	-0.0936371	-0.826479	0.105874	0.572092	-0.521631	0.159752	0.13256	-0.453608	-0.732539	-0.473771	0.0801192	-0.183702	-0.609294	-0.488581	-0.772209	-0.573478	-0.84755	0.739078	0	-0.0812611	0.554523	-0.621519
88	RECN	-0.262338	-0.335794	-0.32531	0.0782437	-0.566687	-0.370279	-0.377451	-0.108374	-0.249921	0.000174806	0.248384	-0.00575092	-0.138264	-0.373339	-0.0821159	0.374269	-0.0200249	0.103763	-0.353577	0.256576	-0.0717697	0.215673	0.319157	0.464232	0.082028	0.272609	-0.309051	0.275621	0.603813	0.146932	0.506787	0.428182	-0.0123367	0.304086	0.508322	0.218316	0.251899	0.0544885	0.605107	0.0846253	0.428312	0.219455	0.308033	-0.0429907	-0.0812611	0	-0.11605	0.0915617
37	RECN	0.430733	0.49863	0.308727	0.737997	0.0215171	0.245821	0.496257	0.349287	0.338684	0.068202	-0.344899	0.279552	0.077305	0.200827	0.480367	-0.533472	0.27514	0.410736	0.645385	-0.164112	0.489773	-0.320379	-0.432962	-0.581475	0.399709	0.194207	-0.168965	-0.412963	-0.159754	0.057722	-0.243912	-0.0979211	0.327122	-0.365853	-0.34145	-0.0524723	0.00645709	-0.28004	-0.561036	-0.258887	-0.474482	-0.403315	-0.560182	0.377566	0.554523	-0.11605	0	-0.433463
51	SMN	-0.418708	-0.673195	-0.319719	-0.634905	0.0475023	0.181717	-0.476438	-0.549863	-0.619355	0.307298	0.276404	-0.406806	-0.287388	-0.228235	-0.49893	0.487491	-0.206236	-0.56393	-0.547318	0.290696	-0.552747	0.160137	0.378699	0.488286	-0.355654	-0.310714	0.447206	0.630196	-0.0307231	-0.457334	0.447698	0.0846636	-0.0332263	0.431434	0.551133	0.230565	-0.0254287	0.236616	0.592	0.800331	0.572051	0.427776	0.714757	-0.412151	-0.621519	0.0915617	-0.433463	0
14	SMN	0.34018	0.438459	0.0539588	0.328179	-0.180418	0.0972602	0.258843	0.131778	0.115822	-0.378213	0.11774	0.51134	0.409045	0.0633164	0.0681857	-0.0460145	0.0670749	0.15268	0.108496	-0.122561	0.186743	-0.0352916	-0.204349	-0.375277	0.0300456	0.0754081	-0.285195	-0.37922	-0.142646	-0.0610606	-0.0817955	0.180698	0.0434117	-0.293245	-0.101454	0.189431	0.343219	0.0539073	-0.272459	-0.0186337	-0.154113	0.0418156	-0.371523	0.0201239	0.286846	-0.0332151	-0.0530277	-0.391562
12	SMN	0.320379	0.46005	0.23824	0.209102	0.141802	0.260741	0.37287	0.390977	0.264411	-0.0930146	-0.236327	0.267542	0.53478	0.570897	0.308705	-0.172218	0.0585668	0.196645	0.418879	-0.241699	0.191317	-0.182654	-0.519523	-0.410841	0.119526	-0.0637148	0.128365	-0.474614	-0.195357	0.0453739	-0.376572	-0.00883988	-0.0101869	-0.31963	-0.512993	-0.133944	0.00702908	-0.0341455	-0.523446	-0.306184	-0.395782	-0.218505	-0.450867	0.163653	0.409919	-0.484158	0.168882	-0.352606
50	SMN	-0.45357	-0.614334	-0.490799	-0.556001	0.105488	0.0996931	-0.42639	-0.430902	-0.581034	0.095601	0.56662	-0.169843	-0.155036	-0.104762	-0.428949	0.520289	-0.110811	-0.54424	-0.437626	0.360785	-0.522466	0.34498	0.543827	0.494045	-0.549412	-0.36698	0.34029	0.569956	0.0190418	-0.292925	0.102485	-0.0527947	-0.0658764	0.418031	0.352342	0.388467	0.147159	0.300192	0.559054	0.637467	0.461203	0.565856	0.81999	-0.158692	-0.566623	0.08006	-0.561662	0.61573
	name of IC	26	91	66	64	25	86	44	29	23	7	40	60	49	33	5	70	57	46	21	34	35	79	87	59	20	22	72	42	31	73	80	100	68	82	43	78	53	58	76	71	65	17	67	30	32	88	37	51
	name of ICN	ASN	ASN	ASN	ASN	AUN	AUN	AUN	AGN	AGN	AGN	HVN	HVN	VSN	VSN	VSN	VSN	LGN	LGN	LGN	LGN	LGN	LECN	LECN	LECN	DDMN	DDMN	DDMN	DDMN	DDMN	DDMN	DDMN	DDMN	PSN	PCN	PCN	PVN	VDMN	VDMN	VDMN	VDMN	VDMN	VDMN	RECN	RECN	RECN	RECN	RECN	SMN
[truncated: 3 more columns]

## Sheet: sham-pre-State1
name of IC	name of ICN	correlations
26	ASN	0	0.305693	0.192275	0.532866	0.0140951	0.687486	0.268257	0.271645	-0.0517602	0.0675211	-0.233358	0.103149	0.345771	0.234727	0.226657	0.133142	0.340042	0.301026	0.137034	0.101351	0.0271058	-0.0747278	0.105664	-0.0829035	0.0330375	0.280719	0.0868252	-0.295969	-0.215566	-0.0567066	0.0732155	0.265763	0.0205952	0.0314101	0.2311	0.291537	0.163045	0.26285	0.162137	0.260873	0.247269	0.0802462	0.374245	0.185755	0.354387	-0.175102	0.540193	0.0817839
91	ASN	0.305693	0	0.235041	0.169884	-0.0032893	0.18576	0.140944	0.0991085	-0.0687345	0.146945	0.119125	0.254513	0.153248	0.0632996	-0.129548	0.0906042	0.176345	0.198978	0.280447	0.445493	-0.0158986	-0.0111376	-0.181826	-0.13623	0.148173	0.0547163	0.140061	-0.184442	0.117897	-2.93258e-05	0.14323	0.0294267	0.246861	-0.0888828	-0.0409238	-0.137904	-0.174271	0.259382	0.0172404	-0.080682	0.0570958	-0.036886	-0.0809621	0.288973	0.282037	-0.204608	0.0935611	0.00587123
66	ASN	0.192275	0.235041	0	-0.0983916	-0.148727	-0.0191327	0.105608	-0.00982359	-0.05951	0.117538	-0.0166376	0.0800573	0.443738	0.145711	-0.136531	-0.0253781	-0.106509	0.028016	0.131917	0.0626858	-0.0455049	-0.0936226	0.102596	-0.0996231	-0.328687	-0.210238	-0.0298817	-0.00291931	-0.134679	0.196014	-0.00339878	-0.341671	0.166491	0.0256833	-0.320041	-0.195767	-0.0975916	-0.0809745	-0.310099	-0.107871	-0.242593	-0.196148	-0.157718	0.340357	0.193804	-0.128827	0.0314937	-0.0904738
64	ASN	0.532866	0.169884	-0.0983916	0	0.0115065	0.306354	-0.00906202	0.166967	0.0807873	0.0146877	-0.18107	-0.214045	0.0472627	0.111034	0.696281	-0.0208479	0.168725	0.470279	0.138001	-0.0468641	0.294077	0.232959	0.349222	-0.0473782	0.11267	0.352374	0.0312432	-0.233209	-0.00407935	0.306884	-0.030917	0.22136	0.115109	0.181254	0.300494	0.157788	0.182515	0.281447	0.256646	0.264844	0.0393856	0.185156	0.297953	0.43586	0.464776	0.327671	0.536058	-0.000732558
25	AUN	0.0140951	-0.0032893	-0.148727	0.0115065	0	0.468338	0.288635	-0.0706902	-0.061066	-0.067376	0.11264	0.0603685	0.354063	0.00178603	0.0793166	-0.154911	0.0852651	0.206326	0.0937279	-0.0974347	-0.185947	-0.0816376	-0.0473641	-0.232094	0.0844565	0.0170294	0.0964133	-0.127241	-0.0860791	-0.11083	-0.283364	0.0279373	0.0103797	0.102645	-0.181786	0.00722435	-0.197766	-0.15973	-0.0692817	0.104734	-0.119174	-0.0637505	0.0456677	-0.100715	-0.0915908	-0.118727	-0.0966591	0.0962479
86	AUN	0.687486	0.18576	-0.0191327	0.306354	0.468338	0	0.534896	0.168864	-0.245994	0.0290636	0.00665199	0.165013	0.473626	0.0745092	0.205671	0.137524	0.227096	0.377743	0.196682	0.0480902	-0.0891567	0.0073995	0.0109359	-0.194401	0.00874043	0.0449177	0.279716	-0.390992	-0.177179	-0.336241	-0.0899966	0.22358	-0.014105	0.134633	0.0964646	0.286763	-0.0746765	0.270296	0.120559	0.280593	0.153594	0.0690685	0.363612	0.0690484	0.154513	-0.115611	0.2264	0.0546887
44	AUN	0.268257	0.140944	0.105608	-0.00906202	0.288635	0.534896	0	-0.043366	-0.338084	0.227497	0.0220941	0.222137	0.254266	-0.245169	-0.0434933	0.210816	-0.0427637	0.329478	0.0993665	0.0766967	0.01831	-0.208056	-0.390137	-0.397468	-0.0603865	-0.349819	0.11144	-0.315839	-0.168534	-0.73157	0.128717	-0.199187	0.282047	0.174946	-0.217352	-0.0534022	0.0941691	-0.242358	0.0285501	-0.126931	-0.0291293	-0.41927	-0.0581136	-0.218676	0.186037	-0.303179	0.110702	-0.0125153
29	AGN	0.271645	0.0991085	-0.00982359	0.166967	-0.0706902	0.168864	-0.043366	0	0.122764	0.0475469	-0.212035	-0.153431	-0.0736559	0.0676938	0.0376802	-0.0658499	0.18474	-0.109533	0.232885	0.0457422	0.0285692	-0.0706879	0.125843	0.0951746	0.354316	0.142365	0.141331	-0.224758	-0.140914	0.042014	-0.0053256	0.245171	-0.174899	-0.205508	0.117452	0.133375	0.0530547	0.244041	0.138372	0.0560635	0.13305	0.126698	0.0402811	0.105493	0.0889678	-0.0550902	0.200592	0.0221906
23	AGN	-0.0517602	-0.0687345	-0.05951	0.0807873	-0.061066	-0.245994	-0.338084	0.122764	0	0.0199296	-0.274283	-0.382331	-0.255414	0.114205	0.098066	-0.326396	0.137298	-0.226128	0.0994886	-0.101948	0.173972	-0.00299566	0.105574	0.189528	0.205069	0.0640236	-0.09835	0.14488	-0.0992053	0.388398	-0.0658319	0.0359447	-0.126002	-0.152881	-0.0080026	-0.161322	-0.00194585	0.136253	-0.0784103	-0.050425	-0.101286	0.0915594	-0.213864	0.133698	0.0133063	0.121978	0.187367	0.0141088
7	AGN	0.0675211	0.146945	0.117538	0.0146877	-0.067376	0.0290636	0.227497	0.0475469	0.0199296	0	-0.0437798	0.0648967	-0.0695574	-0.137464	-0.185599	0.115989	-0.238396	0.0587053	-0.16526	-0.0578418	-0.0780691	-0.15626	-0.2116	-0.231417	-0.0833707	-0.323414	0.298533	0.17513	0.111427	-0.246952	0.0887277	-0.144729	0.158184	0.00772167	-0.0144055	-0.217205	0.0403829	-0.104917	-0.046126	-0.177521	-0.173208	-0.302194	-0.137685	0.0658093	0.167054	-0.0348353	0.118374	0.241098
40	HVN	-0.233358	0.119125	-0.0166376	-0.18107	0.11264	0.00665199	0.0220941	-0.212035	-0.274283	-0.0437798	0	0.611405	0.143489	-0.182525	-0.180455	0.137041	-0.155113	0.0369435	-0.0959767	0.0381357	-0.170053	0.0150412	-0.201207	-0.226642	-0.021505	0.0112185	-0.0165908	-0.0822393	0.277399	-0.145246	-0.0525549	-0.000196981	-0.0552212	-0.100102	-0.260964	0.0241792	-0.076783	-0.244485	-0.191851	-0.0918102	-0.122689	-0.0558471	-0.0973472	-0.20237	-0.0420163	-0.133284	-0.177516	-0.0234053
60	HVN	0.103149	0.254513	0.0800573	-0.214045	0.0603685	0.165013	0.222137	-0.153431	-0.382331	0.0648967	0.611405	0	0.221031	-0.00686912	-0.171384	0.172278	0.0699038	0.172898	-0.257647	0.202125	-0.1838	-0.0754286	-0.135038	-0.096448	-0.189232	0.101681	0.183549	-0.0296689	0.206377	-0.271665	0.0423077	-0.143588	0.055168	0.0356228	-0.0919816	0.218638	-0.0386284	-0.220295	-0.0392315	0.160836	0.180976	0.11518	0.1047	-0.234289	-0.159597	-0.275586	-0.0805454	0.0331004
49	VSN	0.345771	0.153248	0.443738	0.0472627	0.354063	0.473626	0.254266	-0.0736559	-0.255414	-0.0695574	0.143489	0.221031	0	0.186599	0.14526	0.0232753	0.0920933	0.146757	-0.142945	0.051319	-0.397714	0.112668	0.113443	-0.181364	-0.193758	0.057895	0.114344	-0.309443	0.0233559	0.0963631	-0.240977	-0.0958023	0.0120988	0.216752	-0.208205	0.10721	-0.0834899	-0.0351358	-0.209908	0.270843	-0.0590408	0.0224688	0.201938	0.180436	0.144267	-0.235597	0.0155549	-0.0821639
33	VSN	0.234727	0.0632996	0.145711	0.111034	0.00178603	0.0745092	-0.245169	0.0676938	0.114205	-0.137464	-0.182525	-0.00686912	0.186599	0	0.449215	0.10259	0.468981	0.0877791	-0.0652567	0.159707	-0.0416547	0.48145	0.43733	0.412186	-0.309485	0.126861	0.0251714	-0.0827646	0.100578	0.392419	-0.196848	0.0830275	0.0245944	0.00558346	0.0592192	0.103476	-0.0195151	0.220278	-0.260276	0.381751	0.182643	0.573265	0.122877	0.523029	0.202343	0.0067792	0.247152	-0.22
5	VSN	0.226657	-0.129548	-0.136531	0.696281	0.0793166	0.205671	-0.0434933	0.0376802	0.098066	-0.185599	-0.180455	-0.171384	0.14526	0.449215	0	0.19002	0.169699	0.406723	-0.0524482	-0.270235	0.0657427	0.598271	0.409097	0.179209	-0.161779	0.128246	0.0441304	-0.205353	0.0343309	0.279242	-0.0875777	0.128168	0.0643797	0.241632	0.311973	0.215676	0.425998	0.294221	0.111341	0.369842	0.0803244	0.274707	0.365028	0.376316	0.361871	0.292771	0.405743	-0.200874
70	VSN	0.133142	0.0906042	-0.0253781	-0.0208479	-0.154911	0.137524	0.210816	-0.0658499	-0.326396	0.115989	0.137041	0.172278	0.0232753	0.10259	0.19002	0	-0.0795882	0.152923	-0.13134	0.098592	-0.179568	0.291402	-0.047434	-0.0124181	-0.295952	-0.350261	0.208822	-0.0869758	0.0722047	-0.381549	0.182653	-0.164048	0.269232	0.14329	0.289307	0.102155	0.257408	0.175286	0.208587	-0.125267	0.279198	0.0857264	0.0435902	-0.00541073	0.341279	-0.039622	0.158908	-0.179937
57	LGN	0.340042	0.176345	-0.106509	0.168725	0.0852651	0.227096	-0.0427637	0.18474	0.137298	-0.238396	-0.155113	0.0699038	0.0920933	0.468981	0.169699	-0.0795882	0	0.228495	0.105124	0.464345	0.232081	0.190703	0.0846592	0.332871	0.138527	0.574073	-0.0107187	-0.254228	-0.0502091	0.216489	0.0216557	0.480473	-0.176621	-0.0764145	0.252552	0.311733	0.0139882	0.197776	0.136805	0.390564	0.3491	0.370415	0.111996	0.227332	0.0808173	-0.0274499	0.166515	-0.0104862
46	LGN	0.301026	0.198978	0.028016	0.470279	0.206326	0.377743	0.329478	-0.109533	-0.226128	0.0587053	0.0369435	0.172898	0.146757	0.0877791	0.406723	0.152923	0.228495	0	0.0725667	0.371234	0.291786	0.200913	0.00100604	-0.07029	0.0229479	0.207762	0.183962	-0.255394	0.149176	-0.0661366	0.225914	0.245553	0.364376	0.240864	0.113949	-0.00117144	0.138008	-0.0966682	0.261734	0.130807	0.0627502	-0.104327	0.118583	0.333482	0.445907	0.269281	0.199	-0.0621794
21	LGN	0.137034	0.280447	0.131917	0.138001	0.0937279	0.196682	0.0993665	0.232885	0.0994886	-0.16526	-0.0959767	-0.257647	-0.142945	-0.0652567	-0.0524482	-0.13134	0.105124	0.0725667	0	0.233501	0.19898	-0.196478	-0.25386	-0.350759	0.335175	-0.129835	-0.16364	-0.080608	-0.297262	-0.0625307	0.235168	0.100915	0.23029	-0.175398	-0.331203	-0.00588994	-0.0827399	-0.110006	-0.0965831	-0.287138	-0.0788906	-0.196527	-0.263762	0.163534	0.437499	-0.122592	0.259268	0.0678522
34	LGN	0.101351	0.445493	0.0626858	-0.0468641	-0.0974347	0.0480902	0.0766967	0.0457422	-0.101948	-0.0578418	0.0381357	0.202125	0.051319	0.159707	-0.270235	0.098592	0.464345	0.371234	0.233501	0	0.315819	-0.00322207	-0.291404	0.135913	0.12968	0.271838	-0.00501481	0.0709193	0.100024	-0.00997469	0.33673	0.194775	0.0974372	-0.0925949	0.0666163	0.0756674	0.025745	-0.0299432	0.131557	-0.0823681	0.356015	0.133273	-0.187828	0.278138	0.0487731	0.081461	-0.00317631	-0.108419
35	LGN	0.0271058	-0.0158986	-0.0455049	0.294077	-0.185947	-0.0891567	0.01831	0.0285692	0.173972	-0.0780691	-0.170053	-0.1838	-0.397714	-0.0416547	0.0657427	-0.179568	0.232081	0.291786	0.19898	0.315819	0	-0.0200431	0.0300653	0.303947	0.302786	0.372474	-0.151727	0.154612	0.184434	0.24201	0.39637	0.191303	0.107988	0.0145476	0.293978	0.0871717	0.147987	-0.0800708	0.431416	0.142157	0.335998	0.0332477	-0.129323	0.144196	0.097407	0.409622	0.295723	-0.105347
79	LECN	-0.0747278	-0.0111376	-0.0936226	0.232959	-0.0816376	0.0073995	-0.208056	-0.0706879	-0.00299566	-0.15626	0.0150412	-0.0754286	0.112668	0.48145	0.598271	0.291402	0.190703	0.200913	-0.196478	-0.00322207	-0.0200431	0	0.269826	0.409143	-0.103416	0.110234	-0.0400588	-0.0965747	0.408429	0.283534	0.0162451	0.0692028	0.0801737	0.189889	0.158696	0.0621275	0.0249344	0.0855704	0.0564095	0.147319	0.0899835	0.283916	0.135926	0.316026	0.0976163	0.351873	0.125574	-0.241197
87	LECN	0.105664	-0.181826	0.102596	0.349222	-0.0473641	0.0109359	-0.390137	0.125843	0.105574	-0.2116	-0.201207	-0.135038	0.113443	0.43733	0.409097	-0.047434	0.0846592	0.00100604	-0.25386	-0.291404	0.0300653	0.269826	0	0.408983	-0.163804	0.309375	0.183826	0.0537144	0.202852	0.531398	-0.130854	0.136036	-0.266483	0.129256	0.502681	0.239591	0.174367	0.375003	0.160441	0.510474	0.219052	0.611126	0.518611	0.205762	-0.095056	0.308071	0.235374	-0.0355446
59	LECN	-0.0829035	-0.13623	-0.0996231	-0.0473782	-0.232094	-0.194401	-0.397468	0.0951746	0.189528	-0.231417	-0.226642	-0.096448	-0.181364	0.412186	0.179209	-0.0124181	0.332871	-0.07029	-0.350759	0.135913	0.303947	0.409143	0.408983	0	0.17526	0.514041	0.103071	0.265546	0.552924	0.591628	0.171955	0.215212	-0.158314	0.199778	0.484869	0.0217925	0.090797	0.307071	0.438083	0.322011	0.491855	0.567641	0.0874449	0.224106	-0.14409	0.592068	0.0589216	-0.133244
20	DDMN	0.0330375	0.148173	-0.328687	0.11267	0.0844565	0.00874043	-0.0603865	0.354316	0.205069	-0.0833707	-0.021505	-0.189232	-0.193758	-0.309485	-0.161779	-0.295952	0.138527	0.0229479	0.335175	0.12968	0.302786	-0.103416	-0.163804	0.17526	0	0.415958	-0.125802	-0.0387733	0.201532	0.16063	0.27422	0.345721	-0.113759	0.0108186	0.117228	-0.0254138	-0.0571633	-0.10798	0.308149	-0.0571834	0.118098	-0.137047	-0.183835	-0.132216	0.0549575	0.220099	0.0584482	0.0109412
22	DDMN	0.280719	0.0547163	-0.210238	0.352374	0.0170294	0.0449177	-0.349819	0.142365	0.0640236	-0.323414	0.0112185	0.101681	0.057895	0.126861	0.128246	-0.350261	0.574073	0.207762	-0.129835	0.271838	0.372474	0.110234	0.309375	0.514041	0.415958	0	0.026693	0.00349498	0.410037	0.564963	0.0383852	0.693688	-0.390772	0.114181	0.391893	0.275957	0.106567	0.140198	0.38967	0.524176	0.372336	0.441898	0.245061	0.103456	-0.0291316	0.306487	0.0356489	0.00142558
72	DDMN	0.0868252	0.140061	-0.0298817	0.0312432	0.0964133	0.279716	0.11144	0.141331	-0.09835	0.298533	-0.0165908	0.183549	0.114344	0.0251714	0.0441304	0.208822	-0.0107187	0.183962	-0.16364	-0.00501481	-0.151727	-0.0400588	0.183826	0.103071	-0.125802	0.026693	0	0.0196879	0.269163	-0.0964422	-0.0889072	0.041897	-0.0266148	0.291157	0.103813	-0.045748	-0.0925931	0.17438	0.0821382	0.316074	0.117373	0.0683521	0.118405	0.103797	0.10111	0.0887694	-0.00528855	0.345673
42	DDMN	-0.295969	-0.184442	-0.00291931	-0.233209	-0.127241	-0.390992	-0.315839	-0.224758	0.14488	0.17513	-0.0822393	-0.0296689	-0.309443	-0.0827646	-0.205353	-0.0869758	-0.254228	-0.255394	-0.080608	0.0709193	0.154612	-0.0965747	0.0537144	0.265546	-0.0387733	0.00349498	0.0196879	0	0.246788	0.17121	0.313889	-0.120896	-0.0231653	0.186754	0.264669	-0.223984	0.0651921	0.00445051	0.169917	-0.00203063	0.318571	0.0914141	-0.0850102	-0.010496	-0.214268	0.330621	-0.236936	0.000358012
31	DDMN	-0.215566	0.117897	-0.134679	-0.00407935	-0.0860791	-0.177179	-0.168534	-0.140914	-0.0992053	0.111427	0.277399	0.206377	0.0233559	0.100578	0.0343309	0.0722047	-0.0502091	0.149176	-0.297262	0.100024	0.184434	0.408429	0.202852	0.552924	0.201532	0.410037	0.269163	0.246788	0	0.305181	0.266423	0.157044	0.0383572	0.376915	0.285573	-0.0671448	-0.0700034	-0.115202	0.280895	0.267879	0.362331	0.201528	-0.0383012	0.121646	0.0606452	0.389215	-0.066834	-0.0614513
73	DDMN	-0.0567066	-2.93258e-05	0.196014	0.306884	-0.11083	-0.336241	-0.73157	0.042014	0.388398	-0.246952	-0.145246	-0.271665	0.0963631	0.392419	0.279242	-0.381549	0.216489	-0.0661366	-0.0625307	-0.00997469	0.24201	0.283534	0.531398	0.591628	0.16063	0.564963	-0.0964422	0.17121	0.305181	0	-0.0640878	0.164072	-0.215486	-0.024614	0.130407	0.028694	-0.0959296	0.214062	0.0140151	0.292729	0.0300541	0.49291	0.051065	0.540049	0.129345	0.546896	0.15834	-0.0908409
80	DDMN	0.0732155	0.14323	-0.00339878	-0.030917	-0.283364	-0.0899966	0.128717	-0.0053256	-0.0658319	0.0887277	-0.0525549	0.0423077	-0.240977	-0.196848	-0.0875777	0.182653	0.0216557	0.225914	0.235168	0.33673	0.39637	0.0162451	-0.130854	0.171955	0.27422	0.0383852	-0.0889072	0.313889	0.266423	-0.0640878	0	-0.00152879	0.17057	0.254909	0.321695	-0.124797	0.134087	-0.185574	0.452181	-0.178516	0.380276	0.0320924	-0.283029	-0.0485509	0.237574	0.162933	0.0531899	-0.130103
100	DDMN	0.265763	0.0294267	-0.341671	0.22136	0.0279373	0.22358	-0.199187	0.245171	0.0359447	-0.144729	-0.000196981	-0.143588	-0.0958023	0.0830275	0.128168	-0.164048	0.480473	0.245553	0.100915	0.194775	0.191303	0.0692028	0.136036	0.215212	0.345721	0.693688	0.041897	-0.120896	0.157044	0.164072	-0.00152879	0	-0.248702	-0.0763678	0.380444	0.223108	0.1254	0.221938	0.282449	0.248213	0.225558	0.090972	0.17176	0.082779	0.0452022	0.287249	0.2651	0.133245
68	PSN	0.0205952	0.246861	0.166491	0.115109	0.0103797	-0.014105	0.282047	-0.174899	-0.126002	0.158184	-0.0552212	0.055168	0.0120988	0.0245944	0.0643797	0.269232	-0.176621	0.364376	0.23029	0.0974372	0.107988	0.0801737	-0.266483	-0.158314	-0.113759	-0.390772	-0.0266148	-0.0231653	0.0383572	-0.215486	0.17057	-0.248702	0	0.081856	-0.176196	-0.242773	-0.134245	-0.335096	-0.0733412	-0.401844	-0.152814	-0.132501	-0.173587	0.0268694	0.355392	0.0915087	0.209171	-0.0676645
82	PCN	0.0314101	-0.0888828	0.0256833	0.181254	0.102645	0.134633	0.174946	-0.205508	-0.152881	0.00772167	-0.100102	0.0356228	0.216752	0.00558346	0.241632	0.14329	-0.0764145	0.240864	-0.175398	-0.0925949	0.0145476	0.189889	0.129256	0.199778	0.0108186	0.114181	0.291157	0.186754	0.376915	-0.024614	0.254909	-0.0763678	0.081856	0	0.142399	-0.126839	0.0769389	-0.175276	0.133612	0.243371	0.159586	-0.00234949	0.134615	0.0636068	0.110439	0.265313	-0.000725552	-0.0954297
43	PCN	0.2311	-0.0409238	-0.320041	0.300494	-0.181786	0.0964646	-0.217352	0.117452	-0.0080026	-0.0144055	-0.260964	-0.0919816	-0.208205	0.0592192	0.311973	0.289307	0.252552	0.113949	-0.331203	0.0666163	0.293978	0.158696	0.502681	0.484869	0.117228	0.391893	0.103813	0.264669	0.285573	0.130407	0.321695	0.380444	-0.176196	0.142399	0	0.263876	0.293799	0.429563	0.618434	0.44189	0.699632	0.378761	0.273227	0.135866	-0.0053969	0.431577	0.237111	0.0684058
78	PVN	0.291537	-0.137904	-0.195767	0.157788	0.00722435	0.286763	-0.0534022	0.133375	-0.161322	-0.217205	0.0241792	0.218638	0.10721	0.103476	0.215676	0.102155	0.311733	-0.00117144	-0.00588994	0.0756674	0.0871717	0.0621275	0.239591	0.0217925	-0.0254138	0.275957	-0.045748	-0.223984	-0.0671448	0.028694	-0.124797	0.223108	-0.242773	-0.126839	0.263876	0	0.120464	0.00418396	0.0112503	0.517147	0.44249	0.391791	0.721953	0.0116138	-0.28443	0.0255124	0.219789	-0.0845284
53	VDMN	0.163045	-0.174271	-0.0975916	0.182515	-0.197766	-0.0746765	0.0941691	0.0530547	-0.00194585	0.0403829	-0.076783	-0.0386284	-0.0834899	-0.0195151	0.425998	0.257408	0.0139882	0.138008	-0.0827399	0.025745	0.147987	0.0249344	0.174367	0.090797	-0.0571633	0.106567	-0.0925931	0.0651921	-0.0700034	-0.0959296	0.134087	0.1254	-0.134245	0.0769389	0.293799	0.120464	0	0.195909	0.315357	0.250113	0.159866	0.0308498	0.175284	0.0717968	0.18978	0.0685236	0.177719	-0.136174
58	VDMN	0.26285	0.259382	-0.0809745	0.281447	-0.15973	0.270296	-0.242358	0.244041	0.136253	-0.104917	-0.244485	-0.220295	-0.0351358	0.220278	0.294221	0.175286	0.197776	-0.0966682	-0.110006	-0.0299432	-0.0800708	0.0855704	0.375003	0.307071	-0.10798	0.140198	0.17438	0.00445051	-0.115202	0.214062	-0.185574	0.221938	-0.335096	-0.175276	0.429563	0.00418396	0.195909	0	0.311556	0.211726	0.173798	0.297099	0.309184	0.174269	0.0890562	0.0738156	0.195149	0.0796936
76	VDMN	0.162137	0.0172404	-0.310099	0.256646	-0.0692817	0.120559	0.0285501	0.138372	-0.0784103	-0.046126	-0.191851	-0.0392315	-0.209908	-0.260276	0.111341	0.208587	0.136805	0.261734	-0.0965831	0.131557	0.431416	0.0564095	0.160441	0.438083	0.308149	0.38967	0.0821382	0.169917	0.280895	0.0140151	0.452181	0.282449	-0.0733412	0.133612	0.618434	0.0112503	0.315357	0.311556	0	0.175536	0.424371	0.0718597	0.147557	-0.178982	-0.0539984	0.397858	0.111407	0.192393
71	VDMN	0.260873	-0.080682	-0.107871	0.264844	0.104734	0.280593	-0.126931	0.0560635	-0.050425	-0.177521	-0.0918102	0.160836	0.270843	0.381751	0.369842	-0.125267	0.390564	0.130807	-0.287138	-0.0823681	0.142157	0.147319	0.510474	0.322011	-0.0571834	0.524176	0.316074	-0.00203063	0.267879	0.292729	-0.178516	0.248213	-0.401844	0.243371	0.44189	0.517147	0.250113	0.211726	0.175536	0	0.378576	0.399692	0.532725	0.241684	-0.0828068	0.184768	0.118915	0.0300168
65	VDMN	0.247269	0.0570958	-0.242593	0.0393856	-0.119174	0.153594	-0.0291293	0.13305	-0.101286	-0.173208	-0.122689	0.180976	-0.0590408	0.182643	0.0803244	0.279198	0.3491	0.0627502	-0.0788906	0.356015	0.335998	0.0899835	0.219052	0.491855	0.118098	0.372336	0.117373	0.318571	0.362331	0.0300541	0.380276	0.225558	-0.152814	0.159586	0.699632	0.44249	0.159866	0.173798	0.424371	0.378576	0	0.509396	0.244487	-0.0292479	-0.0838622	0.214544	0.194735	-0.112125
17	VDMN	0.0802462	-0.036886	-0.196148	0.185156	-0.0637505	0.0690685	-0.41927	0.126698	0.0915594	-0.302194	-0.0558471	0.11518	0.0224688	0.573265	0.274707	0.0857264	0.370415	-0.104327	-0.196527	0.133273	0.0332477	0.283916	0.611126	0.567641	-0.137047	0.441898	0.0683521	0.0914141	0.201528	0.49291	0.0320924	0.090972	-0.132501	-0.00234949	0.378761	0.391791	0.0308498	0.297099	0.0718597	0.399692	0.509396	0	0.231328	0.176188	-0.216719	0.174552	0.0448692	-0.18703
67	RECN	0.374245	-0.0809621	-0.157718	0.297953	0.0456677	0.363612	-0.0581136	0.0402811	-0.213864	-0.137685	-0.0973472	0.1047	0.201938	0.122877	0.365028	0.0435902	0.111996	0.118583	-0.263762	-0.187828	-0.129323	0.135926	0.518611	0.0874449	-0.183835	0.245061	0.118405	-0.0850102	-0.0383012	0.051065	-0.283029	0.17176	-0.173587	0.134615	0.273227	0.721953	0.175284	0.309184	0.147557	0.532725	0.244487	0.231328	0	0.0667698	-0.240445	0.0980509	0.10191	0.101087
30	RECN	0.185755	0.288973	0.340357	0.43586	-0.100715	0.0690484	-0.218676	0.105493	0.133698	0.0658093	-0.20237	-0.234289	0.180436	0.523029	0.376316	-0.00541073	0.227332	0.333482	0.163534	0.278138	0.144196	0.316026	0.205762	0.224106	-0.132216	0.103456	0.103797	-0.010496	0.121646	0.540049	-0.0485509	0.082779	0.0268694	0.0636068	0.135866	0.0116138	0.0717968	0.174269	-0.178982	0.241684	-0.0292479	0.176188	0.0667698	0	0.327054	0.271748	0.204673	-0.207178
32	RECN	0.354387	0.282037	0.193804	0.464776	-0.0915908	0.154513	0.186037	0.0889678	0.0133063	0.167054	-0.0420163	-0.159597	0.144267	0.202343	0.361871	0.341279	0.0808173	0.445907	0.437499	0.0487731	0.097407	0.0976163	-0.095056	-0.14409	0.0549575	-0.0291316	0.10111	-0.214268	0.0606452	0.129345	0.237574	0.0452022	0.355392	0.110439	-0.0053969	-0.28443	0.18978	0.0890562	-0.0539984	-0.0828068	-0.0838622	-0.216719	-0.240445	0.327054	0	0.0494545	0.514305	0.00911703
88	RECN	-0.175102	-0.204608	-0.128827	0.327671	-0.118727	-0.115611	-0.303179	-0.0550902	0.121978	-0.0348353	-0.133284	-0.275586	-0.235597	0.0067792	0.292771	-0.039622	-0.0274499	0.269281	-0.122592	0.081461	0.409622	0.351873	0.308071	0.592068	0.220099	0.306487	0.0887694	0.330621	0.389215	0.546896	0.162933	0.287249	0.0915087	0.265313	0.431577	0.0255124	0.0685236	0.0738156	0.397858	0.184768	0.214544	0.174552	0.0980509	0.271748	0.0494545	0	0.33549	-0.0340327
37	RECN	0.540193	0.0935611	0.0314937	0.536058	-0.0966591	0.2264	0.110702	0.200592	0.187367	0.118374	-0.177516	-0.0805454	0.0155549	0.247152	0.405743	0.158908	0.166515	0.199	0.259268	-0.00317631	0.295723	0.125574	0.235374	0.0589216	0.0584482	0.0356489	-0.00528855	-0.236936	-0.066834	0.15834	0.0531899	0.2651	0.209171	-0.000725552	0.237111	0.219789	0.177719	0.195149	0.111407	0.118915	0.194735	0.0448692	0.10191	0.204673	0.514305	0.33549	0	-0.0597349
51	SMN	0.0817839	0.00587123	-0.0904738	-0.000732558	0.0962479	0.0546887	-0.0125153	0.0221906	0.0141088	0.241098	-0.0234053	0.0331004	-0.0821639	-0.22	-0.200874	-0.179937	-0.0104862	-0.0621794	0.0678522	-0.108419	-0.105347	-0.241197	-0.0355446	-0.133244	0.0109412	0.00142558	0.345673	0.000358012	-0.0614513	-0.0908409	-0.130103	0.133245	-0.0676645	-0.0954297	0.0684058	-0.0845284	-0.136174	0.0796936	0.192393	0.0300168	-0.112125	-0.18703	0.101087	-0.207178	0.00911703	-0.0340327	-0.0597349	0
14	SMN	0.251449	0.128263	0.0512934	0.027342	0.0830361	0.297143	0.5289	-0.132123	-0.429399	0.119606	0.268003	0.444421	0.364765	-0.199702	0.0782087	0.477785	-0.122293	0.372816	-0.136235	0.0794681	-0.0639489	-0.0328949	-0.228862	-0.348081	-0.218266	-0.138408	0.252817	-0.190356	0.118283	-0.38631	0.0952134	-0.131726	0.0974469	0.126294	-0.025994	0.0688918	0.200908	-0.0736864	0.0556737	0.078489	0.149525	-0.197298	0.147338	-0.0503457	0.275246	-0.286318	0.0777438	0.0291244
12	SMN	0.00493456	-0.0595094	-0.0627751	-0.183082	0.199182	0.194812	0.455036	-0.104915	-0.231063	-0.233984	0.216642	0.216155	0.225395	-0.0652558	-0.0421186	0.294452	0.0442822	0.0693747	0.268393	0.194298	-0.0993969	-0.103831	-0.462666	-0.376314	0.00441029	-0.16683	-0.0982634	-0.220039	-0.154501	-0.342972	0.0606292	-0.142334	0.130444	0.0510089	-0.425118	0.0909254	0.0108049	-0.216847	-0.236017	-0.20013	0.021944	-0.0178033	-0.163058	-0.256406	0.185274	-0.509857	-0.0918957	-0.218534
50	SMN	0.23102	0.0992026	0.0999404	-0.00247533	0.137021	0.390481	0.175131	0.120187	-0.380571	-0.104596	0.152109	0.348838	0.405741	0.136572	0.153899	0.125548	0.0709201	0.0641414	-0.165488	0.055874	-0.154017	-0.0209416	0.229988	-0.0191954	-0.219683	0.184492	0.388033	-0.155319	0.145566	-0.0668746	-0.115942	0.0312208	-0.161607	0.120012	0.105592	0.464047	0.0748768	-0.00452784	0.00713653	0.560803	0.295279	0.205734	0.402407	0.0685735	0.0128393	-0.234904	0.00296269	0.117081
	name of IC	26	91	66	64	25	86	44	29	23	7	40	60	49	33	5	70	57	46	21	34	35	79	87	59	20	22	72	42	31	73	80	100	68	82	43	78	53	58	76	71	65	17	67	30	32	88	37	51
	name of ICN	ASN	ASN	ASN	ASN	AUN	AUN	AUN	AGN	AGN	AGN	HVN	HVN	VSN	VSN	VSN	VSN	LGN	LGN	LGN	LGN	LGN	LECN	LECN	LECN	DDMN	DDMN	DDMN	DDMN	DDMN	DDMN	DDMN	DDMN	PSN	PCN	PCN	PVN	VDMN	VDMN	VDMN	VDMN	VDMN	VDMN	RECN	RECN	RECN	RECN	RECN	SMN
[truncated: 3 more columns]

## Sheet: sham-pre-State2
name of IC	name of ICN	correlations
26	ASN	0	0.472871	0.206271	0.37634	0.0194958	0.363762	0.309747	0.265547	-0.247493	0.25703	0.291416	0.269076	0.0548742	0.0831261	0.0480263	0.120813	0.170719	-0.0650504	0.343739	0.0846861	0.210453	-0.0566285	-0.0367035	-0.139921	0.303961	0.0673276	-0.0484696	-0.0862512	0.185051	-0.0113517	0.234059	0.0173377	0.215066	0.14402	0.0610741	0.0553732	0.090149	0.231553	-0.00512457	0.192645	0.192433	0.172143	-0.131337	0.192977	0.0791439	-0.27959	0.355944	-0.0810013
91	ASN	0.472871	0	0.126401	0.374119	-0.0159283	0.256374	0.0729971	0.364731	0.00428249	0.202186	0.245742	0.309142	-0.0596264	0.0998869	-0.010429	0.0315541	0.265599	0.0681647	0.355152	0.103367	0.0433488	0.154988	-0.130565	0.033155	0.477386	0.169661	-0.100236	-0.0166031	0.25745	0.245151	0.187495	0.0539847	0.236527	0.18531	-0.0363975	0.0201335	-0.00564579	0.324673	0.233282	0.120099	0.133154	0.145661	-0.137399	0.206511	0.0268867	-0.078455	0.0395324	-0.0598643
66	ASN	0.206271	0.126401	0	-0.0583818	0.026121	0.134227	0.0560246	0.0541407	-0.070289	-0.0217793	-0.0261094	0.0355527	0.286728	0.0362283	-0.203237	-0.103584	0.0530072	-0.0910712	0.0779437	-0.0403527	0.0591719	-0.293274	-0.163656	-0.219225	-0.0984248	-0.0261088	0.0567796	-0.165433	-0.0826144	0.0324117	-0.185341	-0.0977119	0.0243378	-0.271115	0.106018	-0.0108721	-0.147205	-0.0596497	-0.238478	0.0931745	-0.00106174	0.0380388	-0.0411083	0.267319	-0.0372044	-0.207092	0.0284628	0.0235136
64	ASN	0.37634	0.374119	-0.0583818	0	-0.053341	0.234302	0.00567208	0.193023	-0.182058	0.121575	0.368798	0.21059	-0.188602	-0.00856229	0.641402	0.366247	-0.142499	0.282268	0.273994	-0.087089	0.32187	0.113459	-0.0286756	-0.0595033	0.25464	0.169717	-0.105938	-0.0507196	0.20906	0.195863	0.259767	0.0867703	0.304791	0.390715	0.00699337	-0.0288281	0.328279	0.406456	0.329621	0.0994863	0.0914064	0.0552763	-0.0611129	0.269526	0.367768	0.274128	0.346823	-0.0784173
25	AUN	0.0194958	-0.0159283	0.026121	-0.053341	0	0.359333	0.377825	-0.0769966	0.115849	-0.0959171	-0.04453	-0.208067	0.310918	0.0430411	-0.0552437	-0.157489	0.0909529	0.0681229	0.273955	0.0736863	0.108533	-0.0722342	0.0186091	0.00929362	0.158556	0.0714888	0.163221	0.172233	-0.0131691	0.000718431	0.01843	0.0272349	0.0339877	-0.07395	0.0847667	0.0873855	-0.105035	0.00616662	0.0105998	0.210078	0.188772	-0.00363205	0.0353198	0.0688728	0.0298866	0.0816194	-0.0160281	-0.0223339
86	AUN	0.363762	0.256374	0.134227	0.234302	0.359333	0	0.428354	0.0930482	-0.212607	0.0950951	0.398418	0.338873	0.215948	0.118841	0.0653733	0.0935474	0.24439	0.149408	0.30098	0.213783	0.298467	0.0844988	0.0109527	0.0083134	0.129267	0.0662688	0.102481	0.123105	0.156148	-0.0374852	0.190343	0.156109	0.147169	0.122827	0.201977	0.200604	0.118789	0.278396	0.159312	0.378004	0.287714	0.186066	-0.243952	0.271104	0.132757	-0.0232918	0.190082	-0.124683
44	AUN	0.309747	0.0729971	0.0560246	0.00567208	0.377825	0.428354	0	-0.00103213	-0.11316	0.0840977	0.152608	0.0922431	0.26102	0.0308629	-0.0532371	-0.0340502	0.164549	-0.0304384	0.19472	0.149784	0.206756	-0.0454662	0.0448555	-0.0978133	0.00973398	-0.123258	0.0240542	-0.0758464	-0.106323	-0.165623	0.128123	0.000215792	0.0674489	-0.0508845	0.0482864	0.169218	-0.0191826	-0.0241443	-0.13315	0.143037	0.110127	0.0924464	-0.140338	0.153919	0.101033	-0.241713	0.309073	-0.0559213
29	AGN	0.265547	0.364731	0.0541407	0.193023	-0.0769966	0.0930482	-0.00103213	0	-0.0527878	0.276553	0.0921874	0.093099	-0.167012	0.0778893	0.0559701	0.0318113	0.142544	0.11096	0.0777028	0.0101189	0.0600225	0.123188	-0.0943443	0.0583372	0.221859	0.180707	-0.0099975	0.0286426	0.18579	0.222636	0.0345196	0.0739531	-0.038782	0.226788	0.0409023	-0.0566527	0.031173	0.192662	0.168309	-0.0305207	0.150223	0.000651671	0.015557	0.113751	0.0621562	0.0433349	0.105374	-0.0650737
23	AGN	-0.247493	0.00428249	-0.070289	-0.182058	0.115849	-0.212607	-0.11316	-0.0527878	0	-0.067003	-0.147135	-0.203624	-0.00268766	0.138706	-0.00012406	-0.225943	0.0518765	0.124037	0.0353561	0.0640567	-0.0854563	0.0997263	0.0325895	0.0649827	0.0917624	0.0308895	-0.0228059	-0.122322	-0.0874651	0.171263	-0.167577	0.0123611	-0.0147639	-0.15333	-0.224439	-0.16374	-0.289933	-0.28315	-0.20888	-0.156781	-0.146011	-0.254718	0.162093	-0.0287678	0.0912248	0.0915429	-0.0765997	-0.0465079
7	AGN	0.25703	0.202186	-0.0217793	0.121575	-0.0959171	0.0950951	0.0840977	0.276553	-0.067003	0	0.259244	0.299404	-0.233504	-0.0359276	0.0698319	0.0702737	0.138056	-0.0372985	0.0319412	-0.0354009	-0.0202775	0.0795763	-0.0923203	0.0261911	0.130076	-0.00141822	0.0676049	0.0707476	0.275507	-0.0114881	0.0365973	0.114469	-0.0153945	0.153834	-0.0927366	-0.0834064	0.0514451	0.147913	0.151004	-0.0410854	0.101668	0.0265335	-0.12974	-0.0025745	0.0302811	0.00158853	0.10623	0.0195254
40	HVN	0.291416	0.245742	-0.0261094	0.368798	-0.04453	0.398418	0.152608	0.0921874	-0.147135	0.259244	0	0.759431	0.115443	0.12826	0.170722	0.380271	0.0949056	0.23006	-0.0620007	0.0759862	0.102888	0.175393	0.104721	0.163817	0.113713	0.218388	-0.0432357	0.19605	0.367897	0.0340196	0.241202	0.252607	0.0400338	0.178998	0.156217	0.322967	0.331029	0.34718	0.308394	0.428451	0.318219	0.375213	-0.209766	0.236703	0.123824	0.189617	0.0416459	-0.154671
60	HVN	0.269076	0.309142	0.0355527	0.21059	-0.208067	0.338873	0.0922431	0.093099	-0.203624	0.299404	0.759431	0	-0.0294452	0.288789	0.1867	0.364897	0.254154	0.164438	-0.0274883	0.126112	-0.0306368	0.349626	-0.0138564	0.177256	-0.00810534	0.140446	-0.153195	0.0304526	0.309573	0.0591537	0.114891	0.174986	-0.0457992	0.144073	-0.0127528	0.32041	0.387933	0.346487	0.16316	0.324473	0.259888	0.456074	-0.322723	0.267806	0.0140254	-0.0162612	0.0734383	-0.167255
49	VSN	0.0548742	-0.0596264	0.286728	-0.188602	0.310918	0.215948	0.26102	-0.167012	-0.00268766	-0.233504	0.115443	-0.0294452	0	0.0895281	-0.180018	-0.039405	9.29057e-05	-0.0719205	-0.0236813	-0.00900018	-0.023409	-0.137653	0.0301375	-0.113361	-0.0423456	0.00885607	-0.120146	0.0545943	-0.129717	-0.0563936	-0.0895573	-0.049677	-0.0275069	-0.137899	0.212179	0.181796	-0.0671726	-0.0542525	-0.185523	0.223813	0.0794348	0.0728846	-0.111212	0.158843	-0.0270108	-0.0570109	-0.00567834	-0.0992323
33	VSN	0.0831261	0.0998869	0.0362283	-0.00856229	0.0430411	0.118841	0.0308629	0.0778893	0.138706	-0.0359276	0.12826	0.288789	0.0895281	0	0.456135	0.469931	0.372864	0.216789	0.125133	0.314116	-0.0448732	0.511943	0.0167717	0.306685	-0.28978	-0.155917	-0.0595925	0.0661609	0.0330788	0.458251	0.00337516	-0.032265	-0.087753	0.0907323	-0.2786	0.0199809	0.042796	0.360577	-0.0500951	0.146442	0.160948	0.0322265	-0.0172514	0.443631	0.440864	-0.00545964	0.125904	-0.183567
5	VSN	0.0480263	-0.010429	-0.203237	0.641402	-0.0552437	0.0653733	-0.0532371	0.0559701	-0.00012406	0.0698319	0.170722	0.1867	-0.180018	0.456135	0	0.525877	0.00102723	0.417488	0.194264	-0.0471793	0.031846	0.518187	0.00653411	0.0929237	-0.0686953	-0.13608	-0.0371783	-0.120501	0.0549353	0.404825	0.123181	0.0688556	0.113832	0.358272	-0.329141	-0.189797	0.18826	0.38683	0.10546	0.00190369	-0.0202146	-0.134986	0.0347643	0.338134	0.615145	0.321393	0.396325	-0.0215412
70	VSN	0.120813	0.0315541	-0.103584	0.366247	-0.157489	0.0935474	-0.0340502	0.0318113	-0.225943	0.0702737	0.380271	0.364897	-0.039405	0.469931	0.525877	0	-0.0830758	0.0740496	-0.0208929	0.0724927	0.0776605	0.305623	0.0798991	0.190772	-0.253341	-0.283843	-0.108342	0.178125	0.149167	0.139762	0.316406	-0.148819	-0.0827175	0.23594	-0.0449549	0.145972	0.510835	0.530525	0.289445	0.125043	0.353052	0.237628	-0.141799	0.370197	0.346393	0.149873	0.186634	-0.221001
57	LGN	0.170719	0.265599	0.0530072	-0.142499	0.0909529	0.24439	0.164549	0.142544	0.0518765	0.138056	0.0949056	0.254154	9.29057e-05	0.372864	0.00102723	-0.0830758	0	0.406316	0.254359	0.609077	0.0814423	0.35059	-0.00369666	0.257426	0.0555287	0.211919	0.00776988	-0.0512735	0.0278996	0.258433	0.00519863	0.284308	0.206329	-0.029701	-0.0171936	-0.028649	-0.0461107	0.142008	-0.0435749	0.106681	0.105076	-0.0138842	-0.0552314	0.253691	0.176778	-0.0273448	-0.0413997	0.0471737
46	LGN	-0.0650504	0.0681647	-0.0910712	0.282268	0.0681229	0.149408	-0.0304384	0.11096	0.124037	-0.0372985	0.23006	0.164438	-0.0719205	0.216789	0.417488	0.0740496	0.406316	0	0.0552312	0.4615	0.209758	0.496539	0.0278409	0.286047	0.149078	0.508839	0.0194326	-0.0478143	0.259597	0.416378	0.0283254	0.555134	0.215488	0.263308	-0.0663003	-0.111865	0.00192879	0.0701205	0.225088	0.0423955	-0.0669819	-0.152888	0.0798343	0.345026	0.319554	0.56296	-0.0427022	-0.0317734
21	LGN	0.343739	0.355152	0.0779437	0.273994	0.273955	0.30098	0.19472	0.0777028	0.0353561	0.0319412	-0.0620007	-0.0274883	-0.0236813	0.125133	0.194264	-0.0208929	0.254359	0.0552312	0	0.0511193	0.0903605	-0.110449	-0.201137	-0.316283	0.227417	-0.139788	0.0938935	-0.245736	-0.174389	0.095377	0.011672	0.0699842	0.369915	-0.0557716	-0.109792	-0.125594	-0.119976	0.179583	-0.131202	-0.054004	-0.0901702	-0.198027	-0.0802721	0.243482	0.258592	-0.179566	0.265582	0.151602
34	LGN	0.0846861	0.103367	-0.0403527	-0.087089	0.0736863	0.213783	0.149784	0.0101189	0.0640567	-0.0354009	0.0759862	0.126112	-0.00900018	0.314116	-0.0471793	0.0724927	0.609077	0.4615	0.0511193	0	0.37786	0.248611	0.000361984	0.314792	-0.0287638	0.16001	0.0051113	0.0422568	0.0998828	0.139026	0.177467	0.216277	0.219032	-0.0042821	0.0607878	0.0831632	-0.0410054	0.0178813	0.146466	0.0458873	0.0455271	0.00123113	-0.0139648	0.258726	0.0924183	0.0190434	-0.123843	0.00300369
35	LGN	0.210453	0.0433488	0.0591719	0.32187	0.108533	0.298467	0.206756	0.0600225	-0.0854563	-0.0202775	0.102888	-0.0306368	-0.023409	-0.0448732	0.031846	0.0776605	0.0814423	0.209758	0.0903605	0.37786	0	-0.153066	0.135486	0.123243	0.0493373	0.154286	0.0287738	0.0900812	0.109272	-0.16137	0.327162	0.0598212	0.232439	0.027863	0.117074	0.0338705	0.0763003	0.0851247	0.30459	0.0378937	0.105166	0.0812702	-0.143785	0.155881	0.195504	0.0986488	-0.0272822	-0.0956335
79	LECN	-0.0566285	0.154988	-0.293274	0.113459	-0.0722342	0.0844988	-0.0454662	0.123188	0.0997263	0.0795763	0.175393	0.349626	-0.137653	0.511943	0.518187	0.305623	0.35059	0.496539	-0.110449	0.248611	-0.153066	0	0.122317	0.565686	0.0222456	0.212384	-0.08303	0.0460652	0.393617	0.553108	0.109658	0.19972	-0.032332	0.528228	-0.261949	-0.0317439	0.055311	0.323091	0.340545	0.0945083	0.086067	-0.0931326	0.096517	0.243945	0.184151	0.441913	-0.0184277	-0.0577338
87	LECN	-0.0367035	-0.130565	-0.163656	-0.0286756	0.0186091	0.0109527	0.0448555	-0.0943443	0.0325895	-0.0923203	0.104721	-0.0138564	0.0301375	0.0167717	0.00653411	0.0798991	-0.00369666	0.0278409	-0.201137	0.000361984	0.135486	0.122317	0	0.241472	-0.00749996	0.0407626	0.169607	0.434001	0.155474	0.0773528	0.244976	-0.131991	-0.0994489	0.169307	-0.116791	0.0640557	0.122524	0.0192384	0.272603	0.127487	0.150543	0.143732	0.156155	-0.015112	-0.053553	0.152315	-0.117645	-0.188765
59	LECN	-0.139921	0.033155	-0.219225	-0.0595033	0.00929362	0.0083134	-0.0978133	0.0583372	0.0649827	0.0261911	0.163817	0.177256	-0.113361	0.306685	0.0929237	0.190772	0.257426	0.286047	-0.316283	0.314792	0.123243	0.565686	0.241472	0	0.0822033	0.433279	0.0944043	0.35973	0.52072	0.39291	0.213683	0.120039	-0.0514646	0.375107	-0.251271	-0.0504673	-0.00187357	0.157825	0.586614	0.0762908	0.117035	0.00973123	0.16009	0.0142011	0.0122177	0.495118	-0.337802	-0.173094
20	DDMN	0.303961	0.477386	-0.0984248	0.25464	0.158556	0.129267	0.00973398	0.221859	0.0917624	0.130076	0.113713	-0.00810534	-0.0423456	-0.28978	-0.0686953	-0.253341	0.0555287	0.149078	0.227417	-0.0287638	0.0493373	0.0222456	-0.00749996	0.0822033	0	0.564904	0.0810282	0.161644	0.415814	0.0415903	0.235364	0.19293	0.173344	0.300693	0.0312644	-0.0923953	0.0212747	0.0249489	0.337622	0.0447546	0.027831	-0.0607828	0.0523454	-0.108537	-0.041977	0.245335	-0.0124636	-0.0350952
22	DDMN	0.0673276	0.169661	-0.0261088	0.169717	0.0714888	0.0662688	-0.123258	0.180707	0.0308895	-0.00141822	0.218388	0.140446	0.00885607	-0.155917	-0.13608	-0.283843	0.211919	0.508839	-0.139788	0.16001	0.154286	0.212384	0.0407626	0.433279	0.564904	0	0.0483198	0.242572	0.608979	0.241387	0.0294337	0.519928	0.112498	0.31263	0.0858754	-0.0524212	0.0175887	-0.0726585	0.423106	0.201819	0.0425655	0.00931939	0.0930721	-0.0768158	-0.046957	0.541938	-0.30364	-0.00714361
72	DDMN	-0.0484696	-0.100236	0.0567796	-0.105938	0.163221	0.102481	0.0240542	-0.0099975	-0.0228059	0.0676049	-0.0432357	-0.153195	-0.120146	-0.0595925	-0.0371783	-0.108342	0.00776988	0.0194326	0.0938935	0.0051113	0.0287738	-0.08303	0.169607	0.0944043	0.0810282	0.0483198	0	0.322574	-0.0220401	0.116066	-0.0273485	-0.118576	-0.05238	0.128498	-0.164658	-0.0469177	-0.14723	0.0248238	0.0874112	0.199408	0.0512372	-0.018275	0.0712595	-0.0688191	-0.0450175	0.0401303	-0.0981768	0.0260202
42	DDMN	-0.0862512	-0.0166031	-0.165433	-0.0507196	0.172233	0.123105	-0.0758464	0.0286426	-0.122322	0.0707476	0.19605	0.0304526	0.0545943	0.0661609	-0.120501	0.178125	-0.0512735	-0.0478143	-0.245736	0.0422568	0.0900812	0.0460652	0.434001	0.35973	0.161644	0.242572	0.322574	0	0.375814	0.0919425	0.387473	-0.0691552	-0.231374	0.34834	0.143091	0.235393	0.105502	0.31392	0.655047	0.453851	0.453654	0.196512	0.0329888	0.0109263	-0.0897862	0.308034	-0.256204	-0.220738
31	DDMN	0.185051	0.25745	-0.0826144	0.20906	-0.0131691	0.156148	-0.106323	0.18579	-0.0874651	0.275507	0.367897	0.309573	-0.129717	0.0330788	0.0549353	0.149167	0.0278996	0.259597	-0.174389	0.0998828	0.109272	0.393617	0.155474	0.52072	0.415814	0.608979	-0.0220401	0.375814	0	0.173273	0.313016	0.258402	-0.152164	0.508294	-0.0145677	0.0229088	0.170278	0.288754	0.722422	0.206504	0.194815	0.0272906	0.0257191	0.0507275	0.019399	0.455917	-0.1997	-0.179532
73	DDMN	-0.0113517	0.245151	0.0324117	0.195863	0.000718431	-0.0374852	-0.165623	0.222636	0.171263	-0.0114881	0.0340196	0.0591537	-0.0563936	0.458251	0.404825	0.139762	0.258433	0.416378	0.095377	0.139026	-0.16137	0.553108	0.0773528	0.39291	0.0415903	0.241387	0.116066	0.0919425	0.173273	0	-0.102593	0.0366019	-0.019576	0.279245	-0.341306	-0.155555	-0.151882	0.231215	0.187031	-0.0232922	-0.011886	-0.219151	0.258046	0.309048	0.323425	0.381019	-0.0817358	-0.0433439
80	DDMN	0.234059	0.187495	-0.185341	0.259767	0.01843	0.190343	0.128123	0.0345196	-0.167577	0.0365973	0.241202	0.114891	-0.0895573	0.00337516	0.123181	0.316406	0.00519863	0.0283254	0.011672	0.177467	0.327162	0.109658	0.244976	0.213683	0.235364	0.0294337	-0.0273485	0.387473	0.313016	-0.102593	0	-0.0525461	0.18975	0.458879	0.144061	0.163284	0.243871	0.442697	0.589995	0.196895	0.295352	0.21663	-0.0857383	-0.0311525	0.0891456	0.145418	0.100556	-0.106204
100	DDMN	0.0173377	0.0539847	-0.0977119	0.0867703	0.0272349	0.156109	0.000215792	0.0739531	0.0123611	0.114469	0.252607	0.174986	-0.049677	-0.032265	0.0688556	-0.148819	0.284308	0.555134	0.0699842	0.216277	0.0598212	0.19972	-0.131991	0.120039	0.19293	0.519928	-0.118576	-0.0691552	0.258402	0.0366019	-0.0525461	0	0.0805823	0.0838854	0.118353	0.00271359	0.0792227	-0.0489607	0.147125	0.0580058	-0.0200167	-0.105932	0.0385245	0.239833	0.190789	0.369702	-0.0329311	0.0392552
68	PSN	0.215066	0.236527	0.0243378	0.304791	0.0339877	0.147169	0.0674489	-0.038782	-0.0147639	-0.0153945	0.0400338	-0.0457992	-0.0275069	-0.087753	0.113832	-0.0827175	0.206329	0.215488	0.369915	0.219032	0.232439	-0.032332	-0.0994489	-0.0514646	0.173344	0.112498	-0.05238	-0.231374	-0.152164	-0.019576	0.18975	0.0805823	0	-0.00588406	-0.0327746	0.0408634	-0.0592756	-0.0337553	0.0370831	-0.0719637	0.00364598	-0.0164458	0.0223238	0.0416102	0.128413	0.0170619	0.159661	0.155078
82	PCN	0.14402	0.18531	-0.271115	0.390715	-0.07395	0.122827	-0.0508845	0.226788	-0.15333	0.153834	0.178998	0.144073	-0.137899	0.0907323	0.358272	0.23594	-0.029701	0.263308	-0.0557716	-0.0042821	0.027863	0.528228	0.169307	0.375107	0.300693	0.31263	0.128498	0.34834	0.508294	0.279245	0.458879	0.0838854	-0.00588406	0	-0.0724032	-0.0908552	0.097642	0.473301	0.669481	0.099557	0.126405	0.00590881	0.0644336	-0.0386903	0.110612	0.345045	0.0588221	-0.116726
43	PCN	0.0610741	-0.0363975	0.106018	0.00699337	0.0847667	0.201977	0.0482864	0.0409023	-0.224439	-0.0927366	0.156217	-0.0127528	0.212179	-0.2786	-0.329141	-0.0449549	-0.0171936	-0.0663003	-0.109792	0.0607878	0.117074	-0.261949	-0.116791	-0.251271	0.0312644	0.0858754	-0.164658	0.143091	-0.0145677	-0.341306	0.144061	0.118353	-0.0327746	-0.0724032	0	0.421534	0.161624	0.0514255	0.0595597	0.304976	0.292374	0.373102	-0.171651	0.0405061	-0.270826	-0.0553848	0.044997	0.0197288
78	PVN	0.0553732	0.0201335	-0.0108721	-0.0288281	0.0873855	0.200604	0.169218	-0.0566527	-0.16374	-0.0834064	0.322967	0.32041	0.181796	0.0199809	-0.189797	0.145972	-0.028649	-0.111865	-0.125594	0.0831632	0.0338705	-0.0317439	0.0640557	-0.0504673	-0.0923953	-0.0524212	-0.0469177	0.235393	0.0229088	-0.155555	0.163284	0.00271359	0.0408634	-0.0908552	0.421534	0	0.222873	0.118669	-0.0258182	0.442365	0.489385	0.510814	-0.058503	0.0382585	-0.182116	-0.0538409	0.0583636	-0.138811
53	VDMN	0.090149	-0.00564579	-0.147205	0.328279	-0.105035	0.118789	-0.0191826	0.031173	-0.289933	0.0514451	0.331029	0.387933	-0.0671726	0.042796	0.18826	0.510835	-0.0461107	0.00192879	-0.119976	-0.0410054	0.0763003	0.055311	0.122524	-0.00187357	0.0212747	0.0175887	-0.14723	0.105502	0.170278	-0.151882	0.243871	0.0792227	-0.0592756	0.097642	0.161624	0.222873	0	0.351898	0.244657	0.230827	0.210519	0.465556	-0.188966	0.0849681	0.0678782	0.100579	0.0430717	-0.148068
58	VDMN	0.231553	0.324673	-0.0596497	0.406456	0.00616662	0.278396	-0.0241443	0.192662	-0.28315	0.147913	0.34718	0.346487	-0.0542525	0.360577	0.38683	0.530525	0.142008	0.0701205	0.179583	0.0178813	0.0851247	0.323091	0.0192384	0.157825	0.0249489	-0.0726585	0.0248238	0.31392	0.288754	0.231215	0.442697	-0.0489607	-0.0337553	0.473301	0.0514255	0.118669	0.351898	0	0.426334	0.285073	0.332245	0.232495	-0.185841	0.222802	0.229427	0.0882614	0.152389	-0.172869
76	VDMN	-0.00512457	0.233282	-0.238478	0.329621	0.0105998	0.159312	-0.13315	0.168309	-0.20888	0.151004	0.308394	0.16316	-0.185523	-0.0500951	0.10546	0.289445	-0.0435749	0.225088	-0.131202	0.146466	0.30459	0.340545	0.272603	0.586614	0.337622	0.423106	0.0874112	0.655047	0.722422	0.187031	0.589995	0.147125	0.0370831	0.669481	0.0595597	-0.0258182	0.244657	0.426334	0	0.138017	0.279284	0.0810464	0.074415	0.00705211	-0.000921223	0.551428	-0.325742	-0.129093
71	VDMN	0.192645	0.120099	0.0931745	0.0994863	0.210078	0.378004	0.143037	-0.0305207	-0.156781	-0.0410854	0.428451	0.324473	0.223813	0.146442	0.00190369	0.125043	0.106681	0.0423955	-0.054004	0.0458873	0.0378937	0.0945083	0.127487	0.0762908	0.0447546	0.201819	0.199408	0.453851	0.206504	-0.0232922	0.196895	0.0580058	-0.0719637	0.099557	0.304976	0.442365	0.230827	0.285073	0.138017	0	0.551362	0.380038	-0.0615482	0.108035	-0.11269	0.0542024	0.0196412	-0.102563
65	VDMN	0.192433	0.133154	-0.00106174	0.0914064	0.188772	0.287714	0.110127	0.150223	-0.146011	0.101668	0.318219	0.259888	0.0794348	0.160948	-0.0202146	0.353052	0.105076	-0.0669819	-0.0901702	0.0455271	0.105166	0.086067	0.150543	0.117035	0.027831	0.0425655	0.0512372	0.453654	0.194815	-0.011886	0.295352	-0.0200167	0.00364598	0.126405	0.292374	0.489385	0.210519	0.332245	0.279284	0.551362	0	0.396626	-0.0837744	0.0745578	-0.0513899	0.0438238	0.0521181	-0.2425
17	VDMN	0.172143	0.145661	0.0380388	0.0552763	-0.00363205	0.186066	0.0924464	0.000651671	-0.254718	0.0265335	0.375213	0.456074	0.0728846	0.0322265	-0.134986	0.237628	-0.0138842	-0.152888	-0.198027	0.00123113	0.0812702	-0.0931326	0.143732	0.00973123	-0.0607828	0.00931939	-0.018275	0.196512	0.0272906	-0.219151	0.21663	-0.105932	-0.0164458	0.00590881	0.373102	0.510814	0.465556	0.232495	0.0810464	0.380038	0.396626	0	-0.227652	0.0220808	-0.259558	-0.127252	0.0195507	-0.178071
67	RECN	-0.131337	-0.137399	-0.0411083	-0.0611129	0.0353198	-0.243952	-0.140338	0.015557	0.162093	-0.12974	-0.209766	-0.322723	-0.111212	-0.0172514	0.0347643	-0.141799	-0.0552314	0.0798343	-0.0802721	-0.0139648	-0.143785	0.096517	0.156155	0.16009	0.0523454	0.0930721	0.0712595	0.0329888	0.0257191	0.258046	-0.0857383	0.0385245	0.0223238	0.0644336	-0.171651	-0.058503	-0.188966	-0.185841	0.074415	-0.0615482	-0.0837744	-0.227652	0	0.00709109	0.0196229	0.168729	-0.148014	0.19028
30	RECN	0.192977	0.206511	0.267319	0.269526	0.0688728	0.271104	0.153919	0.113751	-0.0287678	-0.0025745	0.236703	0.267806	0.158843	0.443631	0.338134	0.370197	0.253691	0.345026	0.243482	0.258726	0.155881	0.243945	-0.015112	0.0142011	-0.108537	-0.0768158	-0.0688191	0.0109263	0.0507275	0.309048	-0.0311525	0.239833	0.0416102	-0.0386903	0.0405061	0.0382585	0.0849681	0.222802	0.00705211	0.108035	0.0745578	0.0220808	0.00709109	0	0.343607	0.0952952	0.0658401	-0.0247578
32	RECN	0.0791439	0.0268867	-0.0372044	0.367768	0.0298866	0.132757	0.101033	0.0621562	0.0912248	0.0302811	0.123824	0.0140254	-0.0270108	0.440864	0.615145	0.346393	0.176778	0.319554	0.258592	0.0924183	0.195504	0.184151	-0.053553	0.0122177	-0.041977	-0.046957	-0.0450175	-0.0897862	0.019399	0.323425	0.0891456	0.190789	0.128413	0.110612	-0.270826	-0.182116	0.0678782	0.229427	-0.000921223	-0.11269	-0.0513899	-0.259558	0.0196229	0.343607	0	0.186646	0.302777	-0.0537054
88	RECN	-0.27959	-0.078455	-0.207092	0.274128	0.0816194	-0.0232918	-0.241713	0.0433349	0.0915429	0.00158853	0.189617	-0.0162612	-0.0570109	-0.00545964	0.321393	0.149873	-0.0273448	0.56296	-0.179566	0.0190434	0.0986488	0.441913	0.152315	0.495118	0.245335	0.541938	0.0401303	0.308034	0.455917	0.381019	0.145418	0.369702	0.0170619	0.345045	-0.0553848	-0.0538409	0.100579	0.0882614	0.551428	0.0542024	0.0438238	-0.127252	0.168729	0.0952952	0.186646	0	-0.215621	-0.0524434
37	RECN	0.355944	0.0395324	0.0284628	0.346823	-0.0160281	0.190082	0.309073	0.105374	-0.0765997	0.10623	0.0416459	0.0734383	-0.00567834	0.125904	0.396325	0.186634	-0.0413997	-0.0427022	0.265582	-0.123843	-0.0272822	-0.0184277	-0.117645	-0.337802	-0.0124636	-0.30364	-0.0981768	-0.256204	-0.1997	-0.0817358	0.100556	-0.0329311	0.159661	0.0588221	0.044997	0.0583636	0.0430717	0.152389	-0.325742	0.0196412	0.0521181	0.0195507	-0.148014	0.0658401	0.302777	-0.215621	0	-0.0677722
51	SMN	-0.0810013	-0.0598643	0.0235136	-0.0784173	-0.0223339	-0.124683	-0.0559213	-0.0650737	-0.0465079	0.0195254	-0.154671	-0.167255	-0.0992323	-0.183567	-0.0215412	-0.221001	0.0471737	-0.0317734	0.151602	0.00300369	-0.0956335	-0.0577338	-0.188765	-0.173094	-0.0350952	-0.00714361	0.0260202	-0.220738	-0.179532	-0.0433439	-0.106204	0.0392552	0.155078	-0.116726	0.0197288	-0.138811	-0.148068	-0.172869	-0.129093	-0.102563	-0.2425	-0.178071	0.19028	-0.0247578	-0.0537054	-0.0524434	-0.0677722	0
14	SMN	0.14432	-0.0353435	0.157662	0.0938189	0.0716277	0.233942	0.350388	-0.03463	-0.170412	-0.122	0.186309	0.1259	0.387615	0.0276646	-0.0461955	0.146417	-0.0568728	-0.00722754	-0.0610406	-0.0178029	0.121307	-0.124545	-0.0618637	-0.155789	-0.159683	-0.0181904	-0.104337	0.0614815	0.000907373	-0.137366	0.113944	-0.021903	-0.0340735	-0.0320886	0.26329	0.272616	0.261642	0.0365715	-0.0671065	0.265576	0.221873	0.217273	-0.132125	0.16358	0.0438717	-0.160359	0.148664	-0.0852758
12	SMN	0.220823	-0.0642206	0.108596	0.0400183	-0.0329642	0.0102709	0.254859	-0.0535595	-0.0299548	-0.159322	-0.0841026	-0.135038	0.122216	0.108914	0.0967607	0.0322674	-0.0853627	-0.254023	0.196096	-0.0657093	0.10315	-0.27737	-0.245303	-0.258649	-0.0812617	-0.31025	-0.128495	-0.36876	-0.275916	-0.173316	-0.0214557	-0.27944	0.17223	-0.215511	-0.165987	0.00972031	0.0418811	-0.044595	-0.411526	-0.193476	-0.146538	-0.0887103	-0.0557597	-0.111459	0.256243	-0.388135	0.398094	0.0274461
50	SMN	0.195623	0.153784	0.162705	0.0630182	0.0602664	0.202148	0.146453	0.0884407	-0.0972071	0.202501	0.169588	0.186502	-0.0176364	0.0679688	0.0770494	-0.034881	0.118819	0.0644012	0.0438519	0.0524748	-0.00800094	-0.00826941	0.0652079	0.0690241	0.113921	0.0762579	0.394218	0.176743	0.0693669	0.0746566	-0.0159881	0.0427164	0.0106192	0.111218	0.0447916	0.0815248	-0.0508538	0.0963781	0.0603706	0.298393	0.196999	0.133264	0.164589	0.170128	-0.0037797	-0.0273475	-0.00269529	0.11119
	name of IC	26	91	66	64	25	86	44	29	23	7	40	60	49	33	5	70	57	46	21	34	35	79	87	59	20	22	72	42	31	73	80	100	68	82	43	78	53	58	76	71	65	17	67	30	32	88	37	51
	name of ICN	ASN	ASN	ASN	ASN	AUN	AUN	AUN	AGN	AGN	AGN	HVN	HVN	VSN	VSN	VSN	VSN	LGN	LGN	LGN	LGN	LGN	LECN	LECN	LECN	DDMN	DDMN	DDMN	DDMN	DDMN	DDMN	DDMN	DDMN	PSN	PCN	PCN	PVN	VDMN	VDMN	VDMN	VDMN	VDMN	VDMN	RECN	RECN	RECN	RECN	RECN	SMN
[truncated: 3 more columns]

## Sheet: sham-pre-State3
name of IC	name of ICN	correlations
26	ASN	0	0.793273	0.341487	0.871434	0.243716	0.495635	0.555777	0.514514	0.163531	-0.0476948	-0.259216	0.485829	0.118631	0.457075	0.576424	-0.19572	0.401453	0.395541	0.201341	-0.151855	0.370944	0.140893	-0.138469	-0.256326	0.319287	0.56414	0.0777292	-0.364559	0.272669	0.382639	-0.0189252	0.332002	0.0993162	0.179525	0.261267	0.0724872	-0.200887	0.55257	0.128697	0.160579	-0.0664127	0.157477	-0.207798	0.391826	0.529765	-0.0340522	0.648936	0.10988
91	ASN	0.793273	0	0.536897	1.18672	0.263494	0.454919	0.586021	0.626423	0.564167	-0.207711	-0.450799	0.405611	0.168458	0.44911	0.741702	-0.708404	0.517534	0.567713	0.532009	-0.555498	0.554449	-0.136825	-0.367819	-0.533996	0.618207	0.642991	0.037019	-0.688607	0.0381176	0.648463	-0.373781	0.354992	-0.0135116	-0.205113	-0.133341	-0.308303	-0.254986	0.310196	-0.284822	0.000909095	-0.456698	-0.0645172	-0.54788	0.581071	0.724271	-0.0461688	0.48726	-0.0734452
66	ASN	0.341487	0.536897	0	0.543162	-0.0404704	0.150079	0.815504	0.171323	0.630116	-0.161339	-0.337299	0.0228647	0.395154	0.41364	0.590819	-0.599179	0.207678	0.773638	0.641912	-0.157217	0.4458	-0.159944	-0.192481	-0.45766	-0.000445047	0.233165	0.126714	-0.745339	-0.0967148	0.561566	-0.30987	-0.0747452	0.117525	-0.375281	-0.346849	-0.665349	-0.464942	0.0619821	-0.410907	-0.426727	-0.737341	-0.339471	-0.521363	0.568175	0.823785	0.139653	0.407175	-0.168353
64	ASN	0.871434	1.18672	0.543162	0	0.041123	0.332951	0.444985	0.593109	0.373703	-0.211847	-0.249835	0.500578	0.146145	0.472745	1.07086	-0.239671	0.263647	0.601971	0.359521	-0.372011	0.526427	0.162016	-0.0815448	-0.342661	0.283691	0.507503	-0.123895	-0.634485	0.195238	0.443104	-0.114757	0.221474	0.227647	0.21865	-0.0230214	-0.142684	-0.196566	0.305937	-0.0569242	-0.00931914	-0.236399	0.0312476	-0.418934	0.459025	0.667883	0.117292	0.736819	-0.089379
25	AUN	0.243716	0.263494	-0.0404704	0.041123	0	0.621676	0.535134	0.204508	0.0749561	-0.248769	0.0494854	-0.0304467	0.378579	0.0139055	-0.0283011	-0.399185	0.373921	0.152001	0.479895	0.113717	0.399989	-0.311912	-0.242622	-0.195695	0.44541	0.291452	0.0672416	-0.137994	0.0138194	0.124844	-0.380644	0.135054	-0.0763025	0.000463043	-0.151665	0.0962179	-0.135433	-0.0264254	-0.163739	0.332121	-0.135226	-0.230164	-0.188278	0.241161	0.185842	-0.0301108	0.0537532	0.0414595
86	AUN	0.495635	0.454919	0.150079	0.332951	0.621676	0	0.386083	0.380419	-0.0268413	-0.334796	-0.07149	0.323724	0.385506	0.172017	0.166171	-0.180154	0.425818	0.143862	0.44581	-0.139367	0.273614	0.049669	-0.211133	-0.239897	0.336242	0.0856794	-0.0879084	-0.214739	-0.0304023	0.0509244	-0.070064	0.212386	0.0425514	-0.0390043	0.109429	0.0355527	-0.203146	0.257045	0.163247	0.14257	-0.0177032	-0.0152262	-0.121133	0.282342	0.279795	-0.147008	0.437741	0.0515385
44	AUN	0.555777	0.586021	0.815504	0.444985	0.535134	0.386083	0	0.0993866	0.696441	-0.00317103	-0.0921894	0.389254	0.401315	0.322545	0.49298	-0.761188	0.457052	0.768339	0.838679	-0.017209	0.685481	-0.205217	-0.263583	-0.658927	0.168245	0.244959	-0.0335208	-0.822949	-0.268742	0.299637	-0.318453	0.0775075	0.0255753	-0.377497	-0.270248	-0.40347	-0.294362	-0.13781	-0.474692	-0.246688	-0.619041	-0.469859	-0.584538	0.59777	0.698498	0.22778	0.700782	-0.300684
29	AGN	0.514514	0.626423	0.171323	0.593109	0.204508	0.380419	0.0993866	0	0.274217	0.0300798	-0.295932	0.10143	0.183476	0.0775267	0.261533	-0.193858	0.240242	0.241314	0.0797171	-0.130879	0.196036	-0.135448	-0.287683	-0.0923868	0.69273	0.408802	0.0455299	-0.243934	0.0560242	0.322751	-0.0819429	0.16585	-0.0343892	-0.137207	0.135655	-0.118114	-0.354327	0.33693	0.0493844	-0.0615873	-0.0956295	0.16363	-0.144864	0.209946	0.365479	0.13806	0.297754	0.178149
23	AGN	0.163531	0.564167	0.630116	0.373703	0.0749561	-0.0268413	0.696441	0.274217	0	0.052218	-0.267977	0.0161427	0.12073	0.367802	0.380225	-1.12376	0.42702	0.570416	0.589991	-0.272432	0.669096	-0.312914	-0.364499	-0.470518	0.179297	0.432223	0.223925	-0.654119	-0.0894694	0.745236	-0.777528	0.26318	-0.110815	-0.516572	-0.564013	-0.775798	-0.241017	-0.198271	-0.674648	-0.269895	-0.96523	-0.45009	-0.904838	0.746448	0.806297	0.0961309	0.199675	-0.410642
7	AGN	-0.0476948	-0.207711	-0.161339	-0.211847	-0.248769	-0.334796	-0.00317103	0.0300798	0.052218	0	0.0201268	0.0242452	-0.254528	-0.457643	-0.260591	0.0322689	-0.328087	-0.27235	-0.210595	-0.120929	-0.289316	-0.226337	-0.101567	0.0266838	0.189659	-0.301777	0.0627579	0.215236	0.0235458	-0.204899	0.0282172	-0.209785	-0.195455	-0.00656767	-0.0650993	0.0214073	0.0664373	-0.108845	-0.0843529	-0.0921609	0.0816241	-0.121623	-0.0527018	-0.279398	-0.318952	0.00119623	0.0828935	0.088089
40	HVN	-0.259216	-0.450799	-0.337299	-0.249835	0.0494854	-0.07149	-0.0921894	-0.295932	-0.267977	0.0201268	0	0.229887	-0.0128363	-0.224557	-0.269252	0.531623	-0.268286	-0.22676	-0.403624	0.454452	-0.213921	0.0300344	0.394194	0.260424	-0.28298	-0.0912273	-0.145466	0.480557	-0.0527667	-0.306611	0.283802	-0.239838	0.125056	0.33196	-0.105614	0.429439	0.562211	-0.586544	0.135864	0.150183	0.341463	-0.0216226	0.469275	-0.139369	-0.521115	0.000493285	0.0503989	0.0227877
60	HVN	0.485829	0.405611	0.0228647	0.500578	-0.0304467	0.323724	0.389254	0.10143	0.0161427	0.0242452	0.229887	0	0.162496	0.359729	0.56045	0.01394	0.105509	0.483211	0.0366365	-0.0567546	0.104767	0.310237	-0.0622809	-0.275585	0.149627	0.173213	-0.362932	-0.271573	0.299882	0.0611842	0.00653555	0.218024	-0.211438	0.217231	-0.118212	0.289347	0.406345	0.132935	-0.228413	0.130517	-0.0634495	0.182935	-0.217015	0.164239	0.0709732	0.160439	0.488765	-0.189946
49	VSN	0.118631	0.168458	0.395154	0.146145	0.378579	0.385506	0.401315	0.183476	0.12073	-0.254528	-0.0128363	0.162496	0	0.0683258	0.0914922	-0.114202	0.229679	0.159329	0.204	0.161176	0.109419	-0.187565	-0.0912708	-0.185859	0.282512	0.0761483	-0.0230762	-0.184472	0.0525365	0.0437376	-0.122341	-0.0063328	-0.00400738	-0.116453	-0.21568	-0.0278366	-0.229798	-0.0439977	-0.309952	0.0491685	-0.0816435	-0.221668	-0.225924	0.125445	0.378044	0.116333	0.193316	-0.265867
33	VSN	0.457075	0.44911	0.41364	0.472745	0.0139055	0.172017	0.322545	0.0775267	0.367802	-0.457643	-0.224557	0.359729	0.0683258	0	0.611902	-0.203926	0.69481	0.511422	0.227213	-0.197968	0.469098	0.450871	0.00149603	-0.144118	-0.087123	0.554153	-0.0363793	-0.258407	0.291207	0.638606	-0.132498	0.35862	-0.100546	-0.140492	0.0515705	-0.140761	-0.23925	0.283465	-0.236536	0.130008	-0.253068	0.149377	-0.387557	0.471997	0.706351	-0.0592059	0.242923	-0.128985
5	VSN	0.576424	0.741702	0.590819	1.07086	-0.0283011	0.166171	0.49298	0.261533	0.380225	-0.260591	-0.269252	0.56045	0.0914922	0.611902	0	-0.255877	0.36303	0.95004	0.362241	-0.291221	0.4266	0.408359	0.0114415	-0.330678	0.0670954	0.454072	-0.0515423	-0.859309	0.162052	0.465979	-0.206753	0.216709	0.0636548	-0.046832	-0.228743	-0.181953	-0.0394059	0.20401	-0.197324	-0.165163	-0.49775	-0.0356232	-0.479273	0.596605	0.733103	0.229401	0.552393	-0.201106
70	VSN	-0.19572	-0.708404	-0.599179	-0.239671	-0.399185	-0.180154	-0.761188	-0.193858	-1.12376	0.0322689	0.531623	0.01394	-0.114202	-0.203926	-0.255877	0	-0.668191	-0.576537	-0.919803	0.364432	-0.638417	0.49454	0.53749	0.639155	-0.429178	-0.557095	-0.225441	0.807878	0.0472321	-0.542545	1.01346	-0.439239	0.271489	0.788804	0.615673	0.779222	0.378861	-0.0255735	0.739454	0.174612	1.08099	0.599817	0.971141	-0.628828	-0.719728	0.0117652	-0.126531	0.237388
57	LGN	0.401453	0.517534	0.207678	0.263647	0.373921	0.425818	0.457052	0.240242	0.42702	-0.328087	-0.268286	0.105509	0.229679	0.69481	0.36303	-0.668191	0	0.474438	0.469921	-0.0599641	0.655337	0.0645689	-0.178358	-0.145756	0.176964	0.716047	0.119914	-0.430878	0.0926561	0.466921	-0.363809	0.622797	-0.0750985	-0.348494	0.11403	-0.387275	-0.301658	0.277362	-0.208793	0.145759	-0.350553	-0.116404	-0.428768	0.43178	0.558851	-0.0938095	0.103451	-0.141678
46	LGN	0.395541	0.567713	0.773638	0.601971	0.152001	0.143862	0.768339	0.241314	0.570416	-0.27235	-0.22676	0.483211	0.159329	0.511422	0.95004	-0.576537	0.474438	0	0.531084	-0.174202	0.613729	0.133535	-0.365328	-0.545106	0.0960057	0.539186	-0.0139609	-0.992085	0.0373789	0.545364	-0.360507	0.307414	0.0265125	-0.226052	-0.428681	-0.394013	-0.215954	-0.0567245	-0.376477	-0.370001	-0.819652	-0.437067	-0.594827	0.645716	0.84018	0.321206	0.448261	-0.255607
21	LGN	0.201341	0.532009	0.641912	0.359521	0.479895	0.44581	0.838679	0.0797171	0.589991	-0.210595	-0.403624	0.0366365	0.204	0.227213	0.362241	-0.919803	0.469921	0.531084	0	-0.23367	0.565231	-0.4275	-0.427103	-0.998201	0.292697	0.201587	-0.0647045	-0.828753	-0.40599	0.331448	-0.734749	0.260197	0.129183	-0.514917	-0.556026	-0.5614	-0.176745	0.0356569	-0.727764	-0.322434	-0.930599	-0.577752	-0.731842	0.660854	0.775527	0.00703445	0.356051	-0.374307
34	LGN	-0.151855	-0.555498	-0.157217	-0.372011	0.113717	-0.139367	-0.017209	-0.130879	-0.272432	-0.120929	0.454452	-0.0567546	0.161176	-0.197968	-0.291221	0.364432	-0.0599641	-0.174202	-0.23367	0	0.177602	-0.0345746	0.101806	0.42886	-0.274776	0.0031876	-0.305533	0.357266	-0.0984775	-0.23164	0.354721	-0.0826139	0.432586	0.0697372	0.0738758	0.350715	0.0944163	-0.447312	0.237759	0.0662547	0.313782	-0.064896	0.499414	-0.149063	-0.315955	0.185752	-0.0420139	0.00519727
35	LGN	0.370944	0.554449	0.4458	0.526427	0.399989	0.273614	0.685481	0.196036	0.669096	-0.289316	-0.213921	0.104767	0.109419	0.469098	0.4266	-0.638417	0.655337	0.613729	0.565231	0.177602	0	-0.121761	-0.478294	-0.220847	0.196263	0.69521	0.0317692	-0.525614	0.115015	0.612579	-0.337809	0.445788	0.0416688	-0.20656	-0.132516	-0.383936	-0.217124	-0.0691383	-0.183366	0.0562076	-0.383006	-0.153836	-0.491117	0.790546	0.693619	0.217043	0.169536	-0.182945
79	LECN	0.140893	-0.136825	-0.159944	0.162016	-0.311912	0.049669	-0.205217	-0.135448	-0.312914	-0.226337	0.0300344	0.310237	-0.187565	0.450871	0.408359	0.49454	0.0645689	0.133535	-0.4275	-0.0345746	-0.121761	0	0.412478	0.369914	-0.342768	0.0198889	-0.165419	0.154775	0.531759	0.00326028	0.456487	0.105573	-0.0416963	0.490149	0.307224	0.350262	0.151713	0.285907	0.418027	0.305193	0.374644	0.352067	0.265521	-0.117301	-0.160497	0.089828	0.0226629	0.0910281
87	LECN	-0.138469	-0.367819	-0.192481	-0.0815448	-0.242622	-0.211133	-0.263583	-0.287683	-0.364499	-0.101567	0.394194	-0.0622809	-0.0912708	0.00149603	0.0114415	0.53749	-0.178358	-0.365328	-0.427103	0.101806	-0.478294	0.412478	0	0.512803	-0.274635	-0.284133	0.0363387	0.543767	-0.00715034	-0.429563	0.554657	-0.468708	0.292241	0.323406	0.429483	0.201561	0.180966	0.0615219	0.412707	0.249126	0.480914	0.500377	0.549358	-0.326601	-0.305186	0.0910956	0.00168611	0.132245
59	LECN	-0.256326	-0.533996	-0.45766	-0.342661	-0.195695	-0.239897	-0.658927	-0.0923868	-0.470518	0.0266838	0.260424	-0.275585	-0.185859	-0.144118	-0.330678	0.639155	-0.145756	-0.545106	-0.998201	0.42886	-0.220847	0.369914	0.512803	0	-0.103016	-0.0232162	0.187325	0.727162	0.398573	-0.0682515	0.564547	-0.233602	0.190446	0.483559	0.44322	0.333914	0.0378167	-0.0458189	0.874696	0.261214	0.758115	0.523507	0.720291	-0.437542	-0.554152	0.367523	-0.483142	0.372195
20	DDMN	0.319287	0.618207	-0.000445047	0.283691	0.44541	0.336242	0.168245	0.69273	0.179297	0.189659	-0.28298	0.149627	0.282512	-0.087123	0.0670954	-0.429178	0.176964	0.0960057	0.292697	-0.274776	0.196263	-0.342768	-0.274635	-0.103016	0	0.486427	0.148817	-0.156503	0.118272	0.257777	-0.368294	0.236734	-0.185287	-0.0700567	-0.0766096	-0.0997983	-0.24677	0.321078	-0.120065	0.164289	-0.145018	0.038238	-0.301925	0.136989	0.217662	0.0598111	0.054761	0.160967
22	DDMN	0.56414	0.642991	0.233165	0.507503	0.291452	0.0856794	0.244959	0.408802	0.432223	-0.301777	-0.0912273	0.173213	0.0761483	0.554153	0.454072	-0.557095	0.716047	0.539186	0.201587	0.0031876	0.69521	0.0198889	-0.284133	-0.0232162	0.486427	0	0.267888	-0.236074	0.614865	0.807083	-0.438719	0.731848	-0.281222	0.021597	-0.0361816	-0.285732	-0.173755	0.256107	-0.107942	0.259868	-0.232341	0.0060613	-0.336853	0.571153	0.528031	0.167707	-0.000184359	0.0862244
72	DDMN	0.0777292	0.037019	0.126714	-0.123895	0.0672416	-0.0879084	-0.0335208	0.0455299	0.223925	0.0627579	-0.145466	-0.362932	-0.0230762	-0.0363793	-0.0515423	-0.225441	0.119914	-0.0139609	-0.0647045	-0.305533	0.0317692	-0.165419	0.0363387	0.187325	0.148817	0.267888	0	-0.049086	0.113989	0.352051	-0.252355	0.0565726	-0.134768	-0.282964	0.142462	-0.443602	-0.316941	0.166011	0.0549901	0.103436	-0.137985	0.128405	-0.000463394	0.0206939	0.240769	-0.00590904	-0.281898	0.525701
42	DDMN	-0.364559	-0.688607	-0.745339	-0.634485	-0.137994	-0.214739	-0.822949	-0.243934	-0.654119	0.215236	0.480557	-0.271573	-0.184472	-0.258407	-0.859309	0.807878	-0.430878	-0.992085	-0.828753	0.357266	-0.525614	0.154775	0.543767	0.727162	-0.156503	-0.236074	-0.049086	0	0.162086	-0.348921	0.686553	-0.338619	0.119661	0.481133	0.566502	0.592524	0.410927	0.0931189	0.648128	0.421157	1.09487	0.527223	0.744417	-0.451241	-0.815032	0.0788927	-0.418688	0.235974
31	DDMN	0.272669	0.0381176	-0.0967148	0.195238	0.0138194	-0.0304023	-0.268742	0.0560242	-0.0894694	0.0235458	-0.0527667	0.299882	0.0525365	0.291207	0.162052	0.0472321	0.0926561	0.0373789	-0.40599	-0.0984775	0.115015	0.531759	-0.00715034	0.398573	0.118272	0.614865	0.113989	0.162086	0	0.390147	-0.0157607	0.321024	-0.529057	0.448409	0.244418	0.185382	0.139581	0.465355	0.156965	0.636468	0.228518	0.576545	0.0149908	0.0978349	0.0450453	0.1162	-0.254253	0.124407
73	DDMN	0.382639	0.648463	0.561566	0.443104	0.124844	0.0509244	0.299637	0.322751	0.745236	-0.204899	-0.306611	0.0611842	0.0437376	0.638606	0.465979	-0.542545	0.466921	0.545364	0.331448	-0.23164	0.612579	0.00326028	-0.429563	-0.0682515	0.257777	0.807083	0.352051	-0.348921	0.390147	0	-0.477282	0.243233	-0.28698	-0.211777	-0.332611	-0.354201	-0.319764	0.115635	-0.375151	-0.234921	-0.50267	-0.121701	-0.41179	0.776806	0.818394	0.233553	0.0847258	-0.0458135
80	DDMN	-0.0189252	-0.373781	-0.30987	-0.114757	-0.380644	-0.070064	-0.318453	-0.0819429	-0.777528	0.0282172	0.283802	0.00653555	-0.122341	-0.132498	-0.206753	1.01346	-0.363809	-0.360507	-0.734749	0.354721	-0.337809	0.456487	0.554657	0.564547	-0.368294	-0.438719	-0.252355	0.686553	-0.0157607	-0.477282	0	-0.346438	0.454242	0.593222	0.956617	0.488748	0.208105	0.129128	0.919675	0.229623	0.966187	0.591419	0.70536	-0.44414	-0.537536	0.0548602	0.0465838	0.158206
100	DDMN	0.332002	0.354992	-0.0747452	0.221474	0.135054	0.212386	0.0775075	0.16585	0.26318	-0.209785	-0.239838	0.218024	-0.0063328	0.35862	0.216709	-0.439239	0.622797	0.307414	0.260197	-0.0826139	0.445788	0.105573	-0.468708	-0.233602	0.236734	0.731848	0.0565726	-0.338619	0.321024	0.243233	-0.346438	0	-0.323506	-0.312966	0.0434738	-0.0466398	0.00134297	0.222369	-0.0652902	0.199274	-0.252579	-0.0432921	-0.321526	0.416908	0.316069	-0.156579	-0.11853	0.105794
68	PSN	0.0993162	-0.0135116	0.117525	0.227647	-0.0763025	0.0425514	0.0255753	-0.0343892	-0.110815	-0.195455	0.125056	-0.211438	-0.00400738	-0.100546	0.0636548	0.271489	-0.0750985	0.0265125	0.129183	0.432586	0.0416688	-0.0416963	0.292241	0.190446	-0.185287	-0.281222	-0.134768	0.119661	-0.529057	-0.28698	0.454242	-0.323506	0	0.316815	0.174977	-0.12344	-0.101084	-0.113027	0.32077	-0.308534	0.0697072	-0.0942943	0.165394	-0.176387	-0.11986	0.12831	0.2122	-0.0706464
82	PCN	0.179525	-0.205113	-0.375281	0.21865	0.000463043	-0.0390043	-0.377497	-0.137207	-0.516572	-0.00656767	0.33196	0.217231	-0.116453	-0.140492	-0.046832	0.788804	-0.348494	-0.226052	-0.514917	0.0697372	-0.20656	0.490149	0.323406	0.483559	-0.0700567	0.021597	-0.282964	0.481133	0.448409	-0.211777	0.593222	-0.312966	0.316815	0	0.253088	0.432323	0.314271	0.120496	0.434921	0.336303	0.567782	0.254322	0.394548	-0.332018	-0.355888	0.162585	-0.104756	0.063225
43	PCN	0.261267	-0.133341	-0.346849	-0.0230214	-0.151665	0.109429	-0.270248	0.135655	-0.564013	-0.0650993	-0.105614	-0.118212	-0.21568	0.0515705	-0.228743	0.615673	0.11403	-0.428681	-0.556026	0.0738758	-0.132516	0.307224	0.429483	0.44322	-0.0766096	-0.0361816	0.142462	0.566502	0.244418	-0.332611	0.956617	0.0434738	0.174977	0.253088	0	0.519573	0.000182806	0.658116	0.958458	0.602905	1.09546	1.03946	0.543987	-0.245782	-0.29897	-0.0825605	-0.0567423	0.423713
78	PVN	0.0724872	-0.308303	-0.665349	-0.142684	0.0962179	0.0355527	-0.40347	-0.118114	-0.775798	0.0214073	0.429439	0.289347	-0.0278366	-0.140761	-0.181953	0.779222	-0.387275	-0.394013	-0.5614	0.350715	-0.383936	0.350262	0.201561	0.333914	-0.0997983	-0.285732	-0.443602	0.592524	0.185382	-0.354201	0.488748	-0.0466398	-0.12344	0.432323	0.519573	0	0.596269	-0.00456928	0.332665	0.653728	0.980145	0.586419	0.792928	-0.477594	-0.683916	-0.00612603	0.0652888	0.0759797
53	VDMN	-0.200887	-0.254986	-0.464942	-0.196566	-0.135433	-0.203146	-0.294362	-0.354327	-0.241017	0.0664373	0.562211	0.406345	-0.229798	-0.23925	-0.0394059	0.378861	-0.301658	-0.215954	-0.176745	0.0944163	-0.217124	0.151713	0.180966	0.0378167	-0.24677	-0.173755	-0.316941	0.410927	0.139581	-0.319764	0.208105	0.00134297	-0.101084	0.314271	0.000182806	0.596269	0	-0.121462	0.0625988	0.32248	0.355658	0.167603	0.220416	-0.129042	-0.505093	-0.00715739	-0.0628399	-0.185036
58	VDMN	0.55257	0.310196	0.0619821	0.305937	-0.0264254	0.257045	-0.13781	0.33693	-0.198271	-0.108845	-0.586544	0.132935	-0.0439977	0.283465	0.20401	-0.0255735	0.277362	-0.0567245	0.0356569	-0.447312	-0.0691383	0.285907	0.0615219	-0.0458189	0.321078	0.256107	0.166011	0.0931189	0.465355	0.115635	0.129128	0.222369	-0.113027	0.120496	0.658116	-0.00456928	-0.121462	0	0.310406	0.26253	0.197036	0.499286	-0.0111311	-0.0327516	0.184844	-0.137879	0.0330622	0.34925
76	VDMN	0.128697	-0.284822	-0.410907	-0.0569242	-0.163739	0.163247	-0.474692	0.0493844	-0.674648	-0.0843529	0.135864	-0.228413	-0.309952	-0.236536	-0.197324	0.739454	-0.208793	-0.376477	-0.727764	0.237759	-0.183366	0.418027	0.412707	0.874696	-0.120065	-0.107942	0.0549901	0.648128	0.156965	-0.375151	0.919675	-0.0652902	0.32077	0.434921	0.958458	0.332665	0.0625988	0.310406	0	0.289486	0.796227	0.549675	0.591489	-0.45369	-0.653502	0.154657	-0.232629	0.569484
71	VDMN	0.160579	0.000909095	-0.426727	-0.00931914	0.332121	0.14257	-0.246688	-0.0615873	-0.269895	-0.0921609	0.150183	0.130517	0.0491685	0.130008	-0.165163	0.174612	0.145759	-0.370001	-0.322434	0.0662547	0.0562076	0.305193	0.249126	0.261214	0.164289	0.259868	0.103436	0.421157	0.636468	-0.234921	0.229623	0.199274	-0.308534	0.336303	0.602905	0.653728	0.32248	0.26253	0.289486	0	0.756126	0.695697	0.34621	-0.190339	-0.236207	-0.259623	-0.154154	0.398643
65	VDMN	-0.0664127	-0.456698	-0.737341	-0.236399	-0.135226	-0.0177032	-0.619041	-0.0956295	-0.96523	0.0816241	0.341463	-0.0634495	-0.0816435	-0.253068	-0.49775	1.08099	-0.350553	-0.819652	-0.930599	0.313782	-0.383006	0.374644	0.480914	0.758115	-0.145018	-0.232341	-0.137985	1.09487	0.228518	-0.50267	0.966187	-0.252579	0.0697072	0.567782	1.09546	0.980145	0.355658	0.197036	0.796227	0.756126	0	0.930657	1.02303	-0.518072	-0.782953	-0.04793	-0.143118	0.287121
17	VDMN	0.157477	-0.0645172	-0.339471	0.0312476	-0.230164	-0.0152262	-0.469859	0.16363	-0.45009	-0.121623	-0.0216226	0.182935	-0.221668	0.149377	-0.0356232	0.599817	-0.116404	-0.437067	-0.577752	-0.064896	-0.153836	0.352067	0.500377	0.523507	0.038238	0.0060613	0.128405	0.527223	0.576545	-0.121701	0.591419	-0.0432921	-0.0942943	0.254322	1.03946	0.586419	0.167603	0.499286	0.549675	0.695697	0.930657	0	0.457863	-0.193821	-0.312871	-0.103871	-0.083315	0.362747
67	RECN	-0.207798	-0.54788	-0.521363	-0.418934	-0.188278	-0.121133	-0.584538	-0.144864	-0.904838	-0.0527018	0.469275	-0.217015	-0.225924	-0.387557	-0.479273	0.971141	-0.428768	-0.594827	-0.731842	0.499414	-0.491117	0.265521	0.549358	0.720291	-0.301925	-0.336853	-0.000463394	0.744417	0.0149908	-0.41179	0.70536	-0.321526	0.165394	0.394548	0.543987	0.792928	0.220416	-0.0111311	0.591489	0.34621	1.02303	0.457863	0	-0.634164	-0.878389	-0.0806377	-0.208975	0.493229
30	RECN	0.391826	0.581071	0.568175	0.459025	0.241161	0.282342	0.59777	0.209946	0.746448	-0.279398	-0.139369	0.164239	0.125445	0.471997	0.596605	-0.628828	0.43178	0.645716	0.660854	-0.149063	0.790546	-0.117301	-0.326601	-0.437542	0.136989	0.571153	0.0206939	-0.451241	0.0978349	0.776806	-0.44414	0.416908	-0.176387	-0.332018	-0.245782	-0.477594	-0.129042	-0.0327516	-0.45369	-0.190339	-0.518072	-0.193821	-0.634164	0	0.872729	0.141945	0.310849	-0.311649
32	RECN	0.529765	0.724271	0.823785	0.667883	0.185842	0.279795	0.698498	0.365479	0.806297	-0.318952	-0.521115	0.0709732	0.378044	0.706351	0.733103	-0.719728	0.558851	0.84018	0.775527	-0.315955	0.693619	-0.160497	-0.305186	-0.554152	0.217662	0.528031	0.240769	-0.815032	0.0450453	0.818394	-0.537536	0.316069	-0.11986	-0.355888	-0.29897	-0.683916	-0.505093	0.184844	-0.653502	-0.236207	-0.782953	-0.312871	-0.878389	0.872729	0	0.0347052	0.364965	-0.28031
88	RECN	-0.0340522	-0.0461688	0.139653	0.117292	-0.0301108	-0.147008	0.22778	0.13806	0.0961309	0.00119623	0.000493285	0.160439	0.116333	-0.0592059	0.229401	0.0117652	-0.0938095	0.321206	0.00703445	0.185752	0.217043	0.089828	0.0910956	0.367523	0.0598111	0.167707	-0.00590904	0.0788927	0.1162	0.233553	0.0548602	-0.156579	0.12831	0.162585	-0.0825605	-0.00612603	-0.00715739	-0.137879	0.154657	-0.259623	-0.04793	-0.103871	-0.0806377	0.141945	0.0347052	0	0.0535509	-0.212392
37	RECN	0.648936	0.48726	0.407175	0.736819	0.0537532	0.437741	0.700782	0.297754	0.199675	0.0828935	0.0503989	0.488765	0.193316	0.242923	0.552393	-0.126531	0.103451	0.448261	0.356051	-0.0420139	0.169536	0.0226629	0.00168611	-0.483142	0.054761	-0.000184359	-0.281898	-0.418688	-0.254253	0.0847258	0.0465838	-0.11853	0.2122	-0.104756	-0.0567423	0.0652888	-0.0628399	0.0330622	-0.232629	-0.154154	-0.143118	-0.083315	-0.208975	0.310849	0.364965	0.0535509	0	-0.264334
51	SMN	0.10988	-0.0734452	-0.168353	-0.089379	0.0414595	0.0515385	-0.300684	0.178149	-0.410642	0.088089	0.0227877	-0.189946	-0.265867	-0.128985	-0.201106	0.237388	-0.141678	-0.255607	-0.374307	0.00519727	-0.182945	0.0910281	0.132245	0.372195	0.160967	0.0862244	0.525701	0.235974	0.124407	-0.0458135	0.158206	0.105794	-0.0706464	0.063225	0.423713	0.0759797	-0.185036	0.34925	0.569484	0.398643	0.287121	0.362747	0.493229	-0.311649	-0.28031	-0.212392	-0.264334	0
14	SMN	0.631433	0.541044	0.202742	0.507453	0.202445	0.417682	0.33192	0.21686	0.242101	-0.512508	-0.162405	0.250923	0.254567	0.678443	0.364	-0.241668	0.562109	0.445712	0.211478	-0.173274	0.461899	0.26957	-0.185568	-0.354212	0.0819634	0.504151	0.213839	-0.408544	0.265151	0.283933	-0.0981815	0.393296	-0.0985949	-0.123554	0.341978	0.0876541	-0.126236	0.352055	-0.0236348	0.268107	-0.0165776	0.187501	-0.0821416	0.308484	0.45544	-0.082758	0.240803	-0.224337
12	SMN	-0.160732	0.114312	0.124409	0.0305935	0.474012	0.0628199	0.0119316	0.0708413	0.233034	-0.340901	0.075206	-0.153463	0.570504	0.15874	0.0598519	-0.106765	0.207573	0.187121	0.143844	0.0458764	0.158254	-0.149829	-0.138438	-0.141618	0.190044	0.217069	0.139182	-0.21662	-0.038717	0.184879	-0.327655	0.0698017	0.103301	-0.0713738	-0.350522	-0.0660759	-0.00976205	-0.173027	-0.308813	-0.00222163	-0.252102	-0.169182	-0.145793	0.19581	0.247896	-0.161916	-0.128424	-0.129644
50	SMN	-0.251646	-0.473288	-0.708288	-0.504151	-0.140812	-0.256303	-0.750378	-0.0984159	-0.657668	0.0731363	0.158962	-0.272727	-0.1949	-0.420329	-0.478333	0.654949	-0.319156	-0.753855	-0.837534	0.206643	-0.574638	0.0997566	0.424373	0.780114	-0.0535793	-0.209089	0.23377	0.685439	0.0880969	-0.26447	0.451267	-0.271016	0.0711353	0.281743	0.404726	0.714579	0.212648	0.126996	0.407853	0.48163	0.858866	0.551649	1.03156	-0.6416	-0.696146	-0.0891396	-0.351229	0.486501
	name of IC	26	91	66	64	25	86	44	29	23	7	40	60	49	33	5	70	57	46	21	34	35	79	87	59	20	22	72	42	31	73	80	100	68	82	43	78	53	58	76	71	65	17	67	30	32	88	37	51
	name of ICN	ASN	ASN	ASN	ASN	AUN	AUN	AUN	AGN	AGN	AGN	HVN	HVN	VSN	VSN	VSN	VSN	LGN	LGN	LGN	LGN	LGN	LECN	LECN	LECN	DDMN	DDMN	DDMN	DDMN	DDMN	DDMN	DDMN	DDMN	PSN	PCN	PCN	PVN	VDMN	VDMN	VDMN	VDMN	VDMN	VDMN	RECN	RECN	RECN	RECN	RECN	SMN
[truncated: 3 more columns]

[truncated: 3 more sheets: sham-post-State1, sham-post-State2, sham-post-State3]
